# Supplementary material for: Determinants of COVID-19-related knowledge and preventive behaviours among students in reopened secondary schools: cross-sectional study
Source: PubMed Central journal article supplement — BMJ Open. 2021 Apr 24;11(4):e050189. doi: 10.1136/bmjopen-2021-050189 (PMC8076628; doi:10.1136/bmjopen-2021-050189), 2021-04-24
Supplement: bmjopen-2021-050189.draft_revisions.pdf [file bmjopen-2021-050189.draft_revisions.pdf]

# BMJ Open

BMJ Open is committed to open peer review. As part of this commitment we make the peer review history of every article we publish publicly available.

When an article is published we post the peer reviewers' comments and the authors' responses online. We also post the versions of the paper that were used during peer review. These are the versions that the peer review comments apply to.

The versions of the paper that follow are the versions that were submitted during the peer review process. They are not the versions of record or the final published versions. They should not be cited or distributed as the published version of this manuscript.

BMJ Open is an open access journal and the full, final, typeset and author-corrected version of record of the manuscript is available on our site with no access controls, subscription charges or pay-per-view fees (<http://bmjopen.bmj.com>).

If you have any questions on BMJ Open's open peer review process please email [info.bmjopen@bmj.com](mailto:info.bmjopen@bmj.com)

# BMJ Open

## Is the students' knowledge and preventive behaviors sufficient enough to combat the spread of COVID-19 in re-opened schools?

|                               |                                                                                                                                                                                                                                                                                                                                                                                                   |
|-------------------------------|---------------------------------------------------------------------------------------------------------------------------------------------------------------------------------------------------------------------------------------------------------------------------------------------------------------------------------------------------------------------------------------------------|
| Journal:                      | <i>BMJ Open</i>                                                                                                                                                                                                                                                                                                                                                                                   |
| Manuscript ID                 | bmjopen-2021-050189                                                                                                                                                                                                                                                                                                                                                                               |
| Article Type:                 | Original research                                                                                                                                                                                                                                                                                                                                                                                 |
| Date Submitted by the Author: | 13-Feb-2021                                                                                                                                                                                                                                                                                                                                                                                       |
| Complete List of Authors:     | Berassa, Simegnew; University of Gondar, Department of Health Education and Behavioral Sciences<br>Adugnaw, Asmamaw; University of Gondar, Department of Health Education and Behavioral Sciences<br>Kassie, Ayenew; University of Gondar, Department of Health Education and Behavioral Sciences<br>Shitu, Kegnien; University of Gondar, Department of Health Education and Behavioral Sciences |
| Keywords:                     | COVID-19, PUBLIC HEALTH, PREVENTIVE MEDICINE                                                                                                                                                                                                                                                                                                                                                      |
|                               |                                                                                                                                                                                                                                                                                                                                                                                                   |

SCHOLARONE™  
Manuscripts

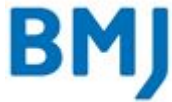

I, the Submitting Author has the right to grant and does grant on behalf of all authors of the Work (as defined in the below author licence), an exclusive licence and/or a non-exclusive licence for contributions from authors who are: i) UK Crown employees; ii) where BMJ has agreed a CC-BY licence shall apply, and/or iii) in accordance with the terms applicable for US Federal Government officers or employees acting as part of their official duties; on a worldwide, perpetual, irrevocable, royalty-free basis to BMJ Publishing Group Ltd ("BMJ") its licensees and where the relevant Journal is co-owned by BMJ to the co-owners of the Journal, to publish the Work in this journal and any other BMJ products and to exploit all rights, as set out in our [licence](#).

The Submitting Author accepts and understands that any supply made under these terms is made by BMJ to the Submitting Author unless you are acting as an employee on behalf of your employer or a postgraduate student of an affiliated institution which is paying any applicable article publishing charge ("APC") for Open Access articles. Where the Submitting Author wishes to make the Work available on an Open Access basis (and intends to pay the relevant APC), the terms of reuse of such Open Access shall be governed by a Creative Commons licence – details of these licences and which [Creative Commons](#) licence will apply to this Work are set out in our licence referred to above.

Other than as permitted in any relevant BMJ Author's Self Archiving Policies, I confirm this Work has not been accepted for publication elsewhere, is not being considered for publication elsewhere and does not duplicate material already published. I confirm all authors consent to publication of this Work and authorise the granting of this licence.

1  
2  
3 **Is the students' knowledge and preventive behaviors sufficient enough to combat the**  
4 **spread of COVID-19 in re-opened schools?**  
5  
6

7 **Simegnew Handebo<sup>1\*</sup> Asmamaw Adugnaw<sup>1</sup> Ayenew Kassie<sup>1</sup> Kegnie Shitu<sup>1</sup>**  
8  
9

10 <sup>1</sup> Department of Health Education and Behavioral Sciences, Institute of public health, College of  
11 Medicine and Health Science, University of Gondar, Gondar, Ethiopia.  
12  
13

14  
15  
16  
17  
18 **Email addresses:**  
19

20 Simegnew Handebo (SH): [hsimegnew@yahoo.com](mailto:hsimegnew@yahoo.com)  
21

22 Asmamaw Adugna (AA): [asmamaw2727@gmail.com](mailto:asmamaw2727@gmail.com)  
23

24 Ayenew Kassie (AK): [kassieayenew@gmail.com](mailto:kassieayenew@gmail.com)  
25

26 Kegnie Shitu (KS): [kegnsh@gmail.com](mailto:kegnsh@gmail.com)  
27  
28  
29  
30  
31

32 **\*Corresponding author (SH)**  
33

34 Email: [hsimegnew@yahoo.com](mailto:hsimegnew@yahoo.com)  
35  
36

37 P.O.Box- 196  
38

39 Telephone: +251-912-490659  
40  
41  
42  
43  
44  
45  
46  
47  
48  
49  
50  
51  
52  
53  
54  
55  
56  
57

## Abstract

**Purpose:** In Ethiopia, more than 26 million students have been out of the classroom for nearly nine months. On September 18th, the Ethiopian Minister of Health advised the Parliament the possibility of reopening schools provided certain conditions were met. Schools are currently reopening in the country for the first time since March.

**Objective:** This study assessed the knowledge and preventive health behaviors toward COVID-19 among secondary school students.

**Design, setting, participants, and outcome measures:** An institution-based cross-sectional study was conducted from October to December, 2020 in Gondar city, Northwest Ethiopia. A total of 370 secondary school students were included. Bivariable and multivariable ordinary logistic regression model were fitted to identify the predictors of knowledge about COVID-19. Whereas, simple and multiple linear regression analysis were done to identify factors associated with preventive behavior. A p-value of less than 0.05 was used to declare statistical significance.

**Results:** Only one fourth (23.5%, 95%CI: 19.5, 28.1) of the participants had a good knowledge about COVID-19. The mean score of preventive behavior was  $22.8 \pm SD 6.2$ . Marital status, religion, father education, living arrangement, and sources of information were significantly associated with knowledge about COVID-19. Being female and using health professionals' as source of information increased the engagement in preventive behaviors. On the other hand, student whose father employed in non-governmental organization and other jobs had decreased engagement in preventive health behaviors.

**Conclusion:** Significant number of the students had inadequate knowledge about COVID-19 and poorly engaged in COVID-19 preventive behavior to tackle the spread of the disease. Thus, it is suggested to include and disseminate about COVID-19 in related academic sessions, using school clubs, and mini-medias. The sources of COVID-19 related information need to strengthen the dissemination of tailored, credible, and timely message to enhance the knowledge and engagement the student in preventive behaviors.

### Strengths and limitations of this study

- We assessed the knowledge and preventive health behaviors toward COVID-19 in re-opened secondary schools.
- The study identified that the knowledge level as well preventive behavior towards COVID-19 of the students is not sufficient enough to combat the spread of the disease.
- The effectiveness of COVID-19 prevention measures needs to be well established among the students.
- School communities need to admit that at the time when access to a vaccine isn't confirmed, adhering to preventive behaviors is the only way of making schools COVID-safe.
- This study has certain limitations to be noted. This is cross sectional study, could not show a cause-and-effect relationship, and the findings represent the situation during the study period. The knowledge and preventive practices among the student may change rapidly. Besides, this study was based on self-report of the participant. There would be social desirability that can bias the findings.

## BACKGROUND

The novel Coronavirus (SARS-CoV-2 or COVID-19) was first reported in December 2019, in Wuhan, Hubei Province, China [1]. The World Health Organization (WHO) declared the coronavirus disease as a global pandemic on March 11, 2020 [2]. The coronavirus COVID-19 is affecting 219 countries and nowadays, it is a public health emergency throughout the world [3]. The fast spread of the disease has taken so many lives and caused massive disruption to families, societies, and economies all over the world [4]. The latest statistics reveal that coronavirus has infected more than 101,457,202 people until 21 January, 2021, and led to the deaths of more than 2,184,619 people worldwide [3].

The Ethiopian Minister of Health announced the first confirmed the first case of COVID-19 in Ethiopia on March 13, 2020 [5, 6]. Then after the government of Ethiopia took different public health measures to prevent the spread of the disease. All primary, secondary and tertiary educational institutions across the country were closed and all public gatherings including sports were banned, impacting more than 26 million students. Hand washing and social distancing were the main preventive measures communicated to the general public [7, 8]. On April 8, 2020 Ethiopian government declared a State of emergency to intensify the control and prevention of the spread of the disease [5]. As of January 27, 2020, there were 134,569 confirmed cases of COVID-19 cases and 2,075 confirmed deaths from the disease [9].

On September 18th, the Ethiopian Minister of Health advised Parliament that it was possible to reopen schools provided certain conditions were met. The ministry adapted the global guidance for reopening school to make the schools safer and established structures to facilitate the process of reopening [10]. The knowledge on mode of disease transmission, basic hygiene principles and other public health measures are important for effective control measures [11]. The government of Ethiopia is using different strategies to enhance the knowledge, attitude and practices towards COVID-19 prevention measures and are not motivating the response to COVID-19 [5, 12].

During such pandemic the WHO advices everybody to take responsibility and adopt protective behaviors [13]. The lack of knowledge about the disease would be one of the most common driving factors for poor adoption of COVID-19 prevention measures and may increase the spread of the disease as well as the number of new cases [14, 15]. Studies conducted in Ethiopian reported contradicting findings regarding knowledge and practices towards COVID-19 preventive

1  
2  
3 measures among different population [16]. Some reported the existence of good knowledge about  
4 COVID-19 and level of prevention practice [17] while others reported poor knowledge and poor  
5 practice related to COVID-19 preventive practice [16-18]. Some studies suggest to consider  
6 individuals risk perception as a major factor to promote the adherence of preventive measures [5,  
7 12, 19].  
8  
9

10  
11  
12 Secondary school students have poor knowledge and healthy preventive practices towards  
13 COVID-19. The exposure to education intervention had improved knowledge, attitude, and  
14 practice of the students [20]. On the other hand, high school students in Ghana had substantial  
15 level of knowledge and positive perception of COVID-19 [21]. A couple studies in Europe  
16 revealed secondary school present a good level of knowledge, shows appropriate practice, and  
17 positive attitude towards COVID-19 at the time of its outbreak [22, 23].  
18  
19  
20  
21  
22

23  
24 The Ethiopian government is using an adopted Risk Communication and Community Engagement  
25 (RCCE) strategic approach to empower people to adopt preventive and health-seeking behaviors  
26 contributing to a reduction in the spread of COVID-19 [5, 24]. The Ethiopian Ministry of Health  
27 and Ethiopian Public Health Institute are proactively working on disseminating prevention  
28 messages on radio and television, at federal and regional levels, reaching a potential audience of  
29 30 million people [25]. In addition, volunteers conducted mobilization activities against COVID-  
30 19 in marketplaces, slums and congested public places [26]. However, the knowledge and practices  
31 towards COVID-19 among the public is not sufficient enough to tackle the rapidly transmitted  
32 disease and undermined the preparedness and responses in the country [5].  
33  
34  
35  
36  
37  
38  
39

40 In Ethiopia Schools are reopening after several months of closure. As schools reopen, strict  
41 precautionary measures are in place to protect students, teachers, non-teaching staff within the  
42 school and community from COVID-19. In such case, the reopening of schools brings an  
43 opportunity to empower students as agents of change to adopt the recommended positive behaviors  
44 to prevent the spread of COVID-19 [27]. Therefore, this study aimed at assessing the knowledge  
45 about COVID-19 and adoption of preventive health behavior among students in the re-opened high  
46 schools.  
47  
48  
49  
50  
51

## 52 **METHODS**

### 53 **Study design and area**



1  
2  
3 An institutional based cross-sectional study design was conducted in Gondar city from November  
4 to December 2020. Gondar city administration is located at about 727 km away from Addis Ababa,  
5 the capital city of Ethiopia, and 180 km away from Bahirdar the capital city of Amhara Regional  
6 State. In the city there are 12 government and 5 private high schools (Grade 9 to Grade 12) with  
7 more than 23,200 students [28].  
8  
9

### 10 11 12 **Sample size and sampling procedure**

13  
14  
15 The sample size was calculated using a single population proportion formula; considering 50%  
16 (since no previous study found) proportion of students who have good preventive health practice  
17 towards COVID-19, 95% confidence interval (CI), marginal error (d) of 5%, and 5% non-response  
18 rate. The final sample size was estimated to be 403 participants.  
19  
20

21  
22 Stratified simple random sampling technique was used to select the study participants. First,  
23 stratification was done based on school ownership into private and governmental schools. Then,  
24 four governmental (Fasiledes, Fasiledes Third, Azezo, and Hidar 11) and two private secondary  
25 schools (Debreselam and Waliya) were selected on random basis. Finally, study participants were  
26 selected randomly based on their class roster using Microsoft excel random number generator.  
27  
28  
29  
30

### 31 32 **Study Variables**

33  
34 **Preventive health behaviors:** Refers to the participant's practice concerning, handwashing,  
35 physical distancing, facemask wearing, so as to prevent COVID-19 infection. It was measured by  
36 eight items having five-point response rate ranging from 1 (Never) to 5 (always). The composite  
37 score of the preventive behaviors ranged from 7 to 35. The higher score indicates compliance  
38 behavior.  
39  
40  
41

42  
43 **Knowledge of COVID-19:** Refers to participant's cognition of symptoms, nature and preventive  
44 measures of COVID-19. It was measured by 17 items having three response categories (1 = True,  
45 2 = False and 3 = I don't know). A correct answer was coded as 1 point whereas, the incorrect and  
46 unknown answer was recoded as zero. The composite score ranged from 0-17 and categorized  
47 using Bloom's cut-off point, as low-level of knowledge (less than 60%; less than 12 score),  
48 moderate level of knowledge (60-80%; 13-14 score) and good level of knowledge (80-100%; 15  
49 and above score) [29].  
50  
51  
52  
53  
54

### 55 56 **Data collection tools and procedures**

1  
2  
3 The data were collected by using pre-tested self-administered questionnaire adapted from different  
4 literatures [15, 17]. The questionnaire was prepared in English, then translated to the local  
5 language, Amharic. Trained four BSc nurses and two Masters of public health professionals  
6 collected the data and supervised the data collection process, respectively. COVID-19 safety  
7 measures (physical distancing, wearing masks, and hand hygiene) were taken during the data  
8 collection process. The questionnaire had five sections including socio demographic, social  
9 support, constructs of Health Belief Model, knowledge, and preventive health behavior. Content  
10 validity and pretest was done with 5 experts panel discussion and 20 students. Data collectors and  
11 supervisors took one day training on the objective of the study, content of the questionnaire, and  
12 ethical issues need to be taken during the data collection process. Each questionnaire was reviewed  
13 for completeness and consistency on daily basis. The internal consistency of the items was checked  
14 by Cronbach's alpha.  
15  
16

### 17 **Data processing and analysis**

18 The collected data entered in to EpiData version 4.6 and exported into to STATA version 14  
19 statistical software for analysis. Multicollinearity among the independent variables was assessed  
20 using variance inflation factors (VIF) and was in the acceptable range. Descriptive statistics was  
21 used to quantify the magnitude of preventive healthy behavior, knowledge and describe the  
22 characteristic of the participant. Bivariable and multivariable ordinary logistic regression model  
23 was fitted to identify the factors associated with knowledge of COVID-19. Those variables with a  
24 p-value of less than 0.25 in the bivariable model were fitted in the multivariable model. The  
25 assumptions of ordinary logistic regression were checked using chi-squared and parallel line tests  
26 (the model was well-fitted with the data). Normality and homogeneity of variances were checked  
27 for preventive health behavior (the variable was normally distributed). Simple linear regression  
28 analysis was computed and all independent variables with p-value less than 0.25 were entered in  
29 multiple linear regression. An unstandardized  $\beta$  coefficient was used to interpret the effect of  
30 predictors to preventive health behavior. Variables with p value less than 0.05 at 95% confidence  
31 interval were considered as statistically significant.  
32  
33

### 34 **Ethical considerations**

35 Ethical clearance was obtained from the Institutional Review Board of the University of Gondar.  
36 Letter of permission was obtained from Gondar city administrative education office. After the  
37  
38

1  
2  
3 purpose and objective of the study have been informed, written consent was obtained from each  
4 study participant. Any identifiers of the study participants were not recorded. Indeed, for the  
5 participants with age less than 18, family/guardian informed consent and an assent from  
6 themselves was taken. Finally, health information was provided for the study participants about  
7 the coronavirus and relative preventive measures.  
8  
9

### 10 11 12 **Patient and public involvement**

13  
14  
15 This research was done without involving patient on the design and implementation. But the  
16 participants and administrative officials were informed about study objectives. The results will be  
17 disseminated to Gondar City Education Office and through open access publication.  
18  
19

## 20 21 **RESULTS**

### 22 23 **Socio demographic characteristics**

24  
25 A total of 370 respondents were participated with a response rate of 91.8%. The non-response was  
26 due to not replying to items on the questionnaire (4.0%), inconsistent responses (2.4%) and not  
27 volunteered without reason (1.8%). More than half of the participant (51.9%) were females. The  
28 higher proportion of the participant were affiliated with Orthodox religion (87.6%), single  
29 (84.6%), and live with their parents (64.1%). The mean age of participants  $18.0 \pm 1.8$  years with the  
30 minimum 15 and maximum 30 years (**Table 1**). With regard to sources of information, television  
31 (55.4%) was the most common source of information about COVID-19 (**Figure 1**).  
32  
33  
34  
35  
36  
37

### 38 39 **Knowledge about COVID-19**

40  
41 The reliability test of the knowledge about COVID-19 items for Cronbach's alpha was 79.0%  
42 According to the Blooms cut-off point nearly half (47.8%) of the participant had low knowledge  
43 about COVID-19. Only one fourth of them (23.5%) had a good knowledge (**Figure 2**). **Table 2**  
44 also presents the details of knowledge about COVID-19.  
45  
46  
47

### 48 49 **Preventive health behavior**

50  
51 The reliability test of the preventive health behavior items for Cronbach's alpha was 78.7%. The  
52 mean of preventive health behavior was 22.8 with standard deviation of 6.2. Two hundred and four  
53 (55.1%, 95% CI: 50.0, 60.2) respondents scored above the mean score of preventive health  
54 behavior.  
55  
56  
57

### Predictors of knowledge about COVID-19

Of the variables satisfied the assumption of proportional odds model, age, marital status, religion, father's educational status, father's occupation, living arrangement, and sources of information for COVID-19 were associated with knowledge of COVID-19 with a p-value of less than 0.25. After controlling the confounding variables, marital status, religion, father's education, living arrangement, and sources of information were significantly associated with knowledge about COVID-19. The odds of having good knowledge (moderate and good) among engaged/married students were nearly half to the odds for single students (AOR=0.47, 95% CI: 0.25, 0.90). The odds of having good knowledge was nearly 7.71 times higher in students affiliated with other religion than those affiliated with Orthodox (AOR=1.78, 95%CI: 1.24, 2.55). Students with father's educational status of diploma and above were 2.56 times higher odds good knowledge than those with uneducated father (AOR=2.56, 95%CI: 1.07, 6.12). The odds of having good knowledge was nearly 0.32 times lower in students living alone than those who lived with their parents (AOR=0.32, 95%CI: 0.15, 0.69). Students who used television (AOR=6.68, 95%CI: 2.73, 16.36), radio (AOR=2.91, 95%CI: 1.04, 8.11), and health profession (AOR=4.15, 95%CI: 1.51, 11.40) as sources of information on COVID-19 were 6.68, 2.91-, and 4.15-times odds of good knowledge than those who used Facebook, respectively (**Table 3**).

### Predictors of COVID-19 preventive health behaviors

In simple linear regression, sex, marital status, grade level, mother's educational status, father's educational status, mother's occupation and father's occupation, living arrangement, source of information about COVID-19, and social support were significant at with a p-value  $\leq 0.25$  and entered in to multiple linear regression. In the multiple linear regression analysis, sex ( $\beta$ :1.35 95% CI: 0.02, 2.68), having father employed in non-governmental organization (NGO) ( $\beta$ : -2.37, 95% CI: -4.71, -0.02), other jobs ( $\beta$ : -3.46, 95% CI: -6.49, -0.43) and health profession as source of information ( $\beta$ :3.00, 95% CI: 0.20, 5.80) were statistically significant at a p-value of less than 0.05. The standardized regression coefficient revealed that source of information was the most important predictor of adoption of COVID-19 preventive measures. The analysis of this study showed that female students were 1.35 times more frequently engaged in preventive health behavior than males. Compared to students with father employed in government institution, engagement in COVID-19 preventive behavior decreased by 2.37 and 3.46 times among those whose father was

1  
2  
3 employed in NGO and other jobs, respectively. Students who used health professionals as sources  
4 of information were three time more engaged in preventive health behavior than those who use  
5 Facebook as source of information provided that other variables are kept constant (**Table 4**).  
6  
7

## 8 9 **DISCUSSION**

10  
11 This study assessed the COVID-19 related knowledge and preventive health behavior of the  
12 student subsequent to the reopening of schools in Ethiopia. Student's adherence to COVID-19  
13 preventive behaviors (physical distancing, wearing a mask, and hand washing) are a key to sustain  
14 the education in the pandemic era. Previous studies addressed the knowledge, attitude, and  
15 practices of COVID-19 immediately after onset of the pandemics in Ethiopia [16-18]. These  
16 studies revealed lack of knowledge, attitude and preventive practice among different populations  
17 [16, 19]. Since the adherence of these behaviors reduce the spread of the disease among the  
18 students, teachers, and community, the current study focused the knowledge of the student and  
19 their level of engagement in preventive behavior.  
20  
21

22  
23 A lack of adequate knowledge is probably the driving force for poor preventive practice as well as  
24 the spread of the disease. In this study only about half (52.2%) of the students had at least moderate  
25 knowledge about COVID-19. This study result is higher than studies done among health science  
26 student in Arbaminch [30] and secondary school student in Egypt (before intervention) [20]. On  
27 the other hands, this finding is lower than studied done among college student in Amhara region,  
28 undergraduate student in Debre Berhan University, undergraduate medical students in Egypt, high  
29 school students in Ghana, Iranian medical students, Libya, Jordan, and Portugal [21-23, 31-36].  
30 The discrepancy is may be due difference in access and use of information sources. The result  
31 highlights the need to address the gap of knowledge timely using tailored and effective approaches.  
32 The authors recommended briefing sessions or including information about the disease is health  
33 related subjects/ lessons may enhance the knowledge of the students.  
34  
35

36  
37 This study showed students had low preventive health behaviors against COVID-19 with 55.1%  
38 respondents scored above the mean score. Contrary to scientific recommendation social distancing,  
39 hand washing, and wearing of a mask were not highly prevalent practices among students. Similar  
40 finding is reported by studies done among university students in Debre Birhan university [32] and  
41 secondary school student in Egypt [20]. Contrary to this study among secondary school students  
42 in in Italy [23] and Portugal [22] reported that students are practicing appropriate preventive  
43  
44  
45  
46  
47  
48  
49  
50  
51  
52  
53  
54  
55  
56  
57

1  
2  
3 behaviors. The difference may be due to difference in COVID-19 related information access, risk  
4 perception, and enforcement of COVID related measures in nations. In addition, college student  
5 in Amhara region, medical students in Egypt, Iran, Libya, Jordan, and University students in  
6 Birzeit (Palestine) [23, 31, 33, 35-37] implemented proper strategies to prevent its spread of the  
7 disease. This may be due too high-risk perception, advanced knowledge about the disease, and  
8 previous experience of infection prevention practice enabled them to properly implement COVID-  
9 19 preventive health behavior. School authorities with respected responsible health authorities  
10 need to identify, meet, and coordinate the implementation of preventive behaviors at schools. The  
11 promotion and awareness creation activities also need to be revised according to the situation  
12 evolution.

13  
14  
15  
16  
17  
18  
19  
20  
21 The analysis of predictors of knowledge about COVID-19 revealed that engaged/married and  
22 students living alone had lower level of knowledge. Similarly, study done among college student  
23 in Amhara region reported single students had good knowledge about COVID-19 [31]. The other  
24 study health science student in Arbaminch reported that married and student living with family  
25 members had good knowledge than their counterparts [30]. Whereas, On the other hand, being  
26 affiliated with other religions, having educated father, and using television, radio, and health  
27 professional as a source of information were positively associated with good knowledge. Health  
28 professionals and electronic medias were the reliable source of information and promote health  
29 awareness and engagement in preventive measures. Study done in Debre Berhan University  
30 reported that source of information about COVID-19 associated with the mean knowledge [32].  
31 Elsewhere study done in Ghana reported that increased access of information from electronic  
32 media and the role of peers and family members in dissemination of COVID-19 related  
33 information [21].

34  
35  
36  
37  
38  
39  
40  
41  
42  
43  
44 The analysis on the predictor of preventive health behavior among the student showed that being  
45 female and health professionals' source of information increased the engagement in preventive  
46 behaviors. We found that females engaged more in preventive health behaviors than males. This  
47 is allied with a tendency of females to be more health-conscious and engaged in preventive  
48 behavior [38]. Moreover, the low preventive behavior in men may be due to their perceptions of  
49 masculinity which reduces their motivation to accept preventive health behavior [24, 39]. Similar  
50 findings were reported by studies done in Portugal, medical students in Egypt, university students

1  
2  
3 in Palestine, and China [22, 33, 37, 40]. Health messages and other health promotion initiatives at  
4 schools need to introduce gender-specific tailor preventive measures in order to enhance their  
5 efficiency. On the other hand, student whose father employed in non-governmental organization  
6 and other jobs had decreased engagement in preventive health behaviors. In this study the level of  
7 knowledge of the participant was not significant predictor for preventive health behavior. This  
8 may be due to knowledge is neither sufficient nor necessary to trigger a behavioral change  
9 (adopting preventive behaviors).  
10  
11  
12  
13  
14

15  
16 This study has certain limitations to be noted. This is cross sectional study, could not show a cause-  
17 and-effect relationship, and the findings represent the situation during the study period. The  
18 knowledge and preventive practices among the student may change rapidly. Besides, this study  
19 was based on self-report of the participant. There would be social desirability that can bias the  
20 findings.  
21  
22  
23  
24

## 25 **CONCLUSIONS**

26  
27 In this study, substantial number of the students had inadequate knowledge about COVID-19 and  
28 poorly engaged in COVID-19 preventive health behavior. The research results indicated that  
29 engaged/married and students living alone had a lower level of knowledge. Being affiliated with  
30 other religions, having educated father, and using television, radio, and health professional as a  
31 source of information were all been associated with good knowledge. Sex, father occupation and  
32 source of information have all contributed to COVID-19 preventive behaviors. Therefore, the  
33 effectiveness of COVID-19 prevention measures needs to be well established among the students.  
34 Interventions that increase the awareness of the students and promote health behaviors need to be  
35 strengthen in secondary schools. It is suggested to introduce COVID-19 related message need to  
36 be disseminated in related academic sessions, using school clubs, and mini-medias. In addition,  
37 the main sources of COVID-19 related information (health professionals, television, and radio)  
38 need to strengthen the dissemination of tailored, credible, and timely message to enhance the  
39 knowledge and engagement the student in preventive health behaviors.  
40  
41  
42  
43  
44  
45  
46  
47  
48  
49

## 50 **Acknowledgements**

51  
52 The authors would like to thank the study participant and data collectors for their cooperation.  
53  
54

## 55 **Contributors**

1  
2  
3 SH AA AK and KS conceived and designed the study. SH AA AK and KS participated in data  
4 processing and management. SH analyzed the data and drafted the manuscript. AK and KS  
5 participated in data analysis and interpretation. SH AA AK and KS reviewed the drafted  
6 manuscript. All authors read and approved the final manuscript.  
7  
8  
9

## 10 **Funding**

11  
12 The author received no specific funding for this work  
13  
14

## 15 **Competing interests**

16  
17 The author declare that he has no conflict of interest  
18  
19

## 20 **Consent for publication**

21  
22 Not applicable  
23

## 24 **Data availability statement**

25  
26 Data will be available from the corresponding author upon reasonable request.  
27  
28

## 29 **REFERENCE**

- 30  
31 1. Zu ZY, Jiang MD, Xu PP, Chen W, Ni QQ, Lu GM, Zhang LJ. Coronavirus disease 2019  
32 (COVID-19): a perspective from China. *Radiology*. 2020 Aug;296(2): E15-25.  
33  
34 2. World health organization: Listings of WHO's response to COVID-19  
35 <https://www.who.int/news/item/29-06-2020-covid-timeline>. Accessed 28 January 2021.  
36  
37 3. Worldometers. Covid-19 coronavirus pandemic; 2020. Available from:  
38 <https://www.worldometers.info/coronavirus/>. Accessed 28 January 2021.  
39  
40 4. COVID-19: One year later – WHO Director-General's new year message  
41 [https://www.who.int/news/item/30-12-2020-covid-19-anniversary-and-looking-forward-](https://www.who.int/news/item/30-12-2020-covid-19-anniversary-and-looking-forward-to-2021)  
42 [to-2021](https://www.who.int/news/item/30-12-2020-covid-19-anniversary-and-looking-forward-to-2021). Accessed 28 January 2021.  
43  
44 5. Zikargae MH. COVID-19 in Ethiopia: Assessment of How the Ethiopian Government has  
45 Executed Administrative Actions and Managed Risk Communications and Community  
46 Engagement. *Risk management and healthcare policy*. 2020; 13:2803.  
47  
48 6. Ministry of Health and Ethiopian Public Health Institute. Ethiopia Confirmed the First Case  
49 of Covid-19 [https://www.ephi.gov.et/images/pictures/pic\\_2011/pic\\_2012/First-English-](https://www.ephi.gov.et/images/pictures/pic_2011/pic_2012/First-English-Press-release-1.pdf)  
50 [Press-release-1.pdf](https://www.ephi.gov.et/images/pictures/pic_2011/pic_2012/First-English-Press-release-1.pdf)  
51  
52  
53  
54  
55  
56  
57



- 1
  - 2
  - 3
  - 4
  - 5
  - 6
  - 7
  - 8
  - 9
  - 10
  - 11
  - 12
  - 13
  - 14
  - 15
  - 16
  - 17
  - 18
  - 19
  - 20
  - 21
  - 22
  - 23
  - 24
  - 25
  - 26
  - 27
  - 28
  - 29
  - 30
  - 31
  - 32
  - 33
  - 34
  - 35
  - 36
  - 37
  - 38
  - 39
  - 40
  - 41
  - 42
  - 43
  - 44
  - 45
  - 46
  - 47
  - 48
  - 49
  - 50
  - 51
  - 52
  - 53
  - 54
  - 55
  - 56
  - 57
  - 58
  - 59
  - 60
7. Ministry of Education. Concept Note for Education Sector COVID 19-Preparedness and Response Plan. Addis Ababa, Ethiopia: 3<sup>rd</sup> April 2020.
8. Baye K. COVID-19 prevention measures in Ethiopia: Current realities and prospects. Intl Food Policy Res Inst; 2020 May 12.
9. WHO Health Emergency Dashboard; Ethiopia. Available at: <https://covid19.who.int/region/afro/country/et>. Accessed 28, January 2021.
10. UNICEF Ethiopia. The case for safely reopening schools in Ethiopia. Available at: <https://www.unicef.org/ethiopia/stories/case-safely-reopening-schools-ethiopia>. Accessed 28, January 2021.
11. Erfani A, Shahriarirad R, Ranjbar K, Mirahmadizadeh A, Moghadami M. Knowledge, attitude and practice toward the novel coronavirus (COVID-19) outbreak: a population-based survey in Iran. Bull World Health Organ. 2020 Mar 30;30(10.2471).
12. Geda NR, Legesse B, Kebede SW, Fikadu B. Perceptions of Risks and Impacts of COVID-19 Among the Public in Ethiopia. Frontier: Insights; 2020.
13. World Health Organization. Managing epidemics: key facts about major deadly diseases. World Health Organization; 2018. <https://apps.who.int/iris/handle/10665/272442>.
14. World Health Organization. RCCE ACTION PLAN GUIDANCE: COVID-19 preparedness & response. <https://www.who.int/docs/default-source/coronaviruse/covid19-rcce-guidance-final-brand.pdf>.
15. Zegarra-Valdivia J, Vilca BN, Guerrero RJ. Knowledge, perception and attitudes in Regard to COVID-19 Pandemic in Peruvian Population, 2020.
16. Teferi SC. A Review on Knowledge, Attitude, and Practice during the COVID-19 Pandemic in Ethiopia. Int J Virol Infect Dis. 2020;5(2): 040-044.
17. Kebede Y, Yitayih Y, Birhanu Z, Mekonen S, Ambelu A. Knowledge, perceptions and preventive practices towards COVID-19 early in the outbreak among Jimma university medical center visitors, Southwest Ethiopia. PloS one. 2020 May 21;15(5):e0233744.
18. Tesfaye ZT, Yismaw MB, Negash Z, Ayele AG. COVID-19-related knowledge, attitude and practice among hospital and community pharmacists in Addis Ababa, Ethiopia. Integrated Pharmacy Research & Practice. 2020; 9:105.

19. Girma S, Agenagnew L, Beressa G, Tesfaye Y, Alenko A. Risk perception and precautionary health behavior toward COVID-19 among health professionals working in selected public university hospitals in Ethiopia. *Plos one*. 2020 Oct 29;15(10):e0241101.
20. Ayed MM, Mahmoud TM, Kamal FE. Impact of Teaching Program Regarding COVID-19 on Knowledge, Attitudes, Practices among Student.
21. IBk L, Apanga PA, Kumbeni MT, Akunvane R, Akparibo R. Knowledge and perceptions on COVID-19 among Senior High School students in Ghana: a cross-sectional study.
22. Alves RF, Samorinha C, Precioso J. Knowledge, attitudes and preventive behaviors toward COVID-19: a study among higher education students in Portugal. *Journal of Health Research*. 2020 Nov 11.
23. Souli D, Dilucca M. Knowledge, attitude and practice of secondary school students toward COVID-19 epidemic in Italy: a cross selectional study. *bioRxiv*. 2020 Jan 1.
24. Ministry of Health and Ethiopian Public Health Institute. Risk Communication and Community Engagement Strategy for COVID-19 Outbreak Response in Ethiopia. RCCE. Addis Ababa, Ethiopia: MoH & EPHI; 2020.
25. UNICEF. Creating awareness about COVID-19 in Ethiopia. Available at: <https://www.unicef.org/ethiopia/media/2716/file/COVID%2019%20Response%20update%20#1.pdf>.
26. UNICEF Ethiopia. Available at: <https://www.unicef.org/ethiopia/stories/youth-volunteers-take-streets-mobilize-against-covid-19-ethiopia-0>. Accessed 28, January 2021.
27. World Health Organization: Ethiopia. News and Press Release. 31 December 2020. Available at: <https://www.who.int/emergencies/diseases/novel-coronavirus-2019/advice>. Accessed 28, January 2021.
28. Gorndar City administration Educational Affairs, Preparatory School students list by sex and school type, 2019/2020.
29. Bloom BS. (1956) *Taxonomy education*. New York: David McKay.
30. Wogayehu B, Taye W, Faraja K. Knowledge regarding 2019 novel coronavirus (2019-nCoV) infection among final year health science students at Arbaminch College of Health Sciences, Southern Ethiopia: a cross-sectional study.

- 1  
2  
3 31. Tadesse AW, Melese N, Eshetie S, Chane M, Ali A. Knowledge, Attitude, and Practice  
4 and Associated Factors towards COVID-19 among College Students in Amhara Region,  
5 Ethiopia; A Cross-Sectional Study.  
6  
7
- 8 32. Aynalem YA, Akalu TY, Gebresellassie B, Sharew NT, Shiferaw WS. Assessment of  
9 undergraduate student knowledge, practices, and attitude towards COVID-19 in Debre  
10 Berhan University, Ethiopia.  
11  
12
- 13 33. Soltan EM, El-Zoghby SM, Salama HM. Knowledge, Risk Perception, and Preventive  
14 Behaviors Related to COVID-19 Pandemic Among Undergraduate Medical Students in  
15 Egypt. *SN comprehensive clinical medicine*. 2020 Dec;2(12):2568-75.  
16  
17
- 18 34. Taghrir MH, Borazjani R, Shiraly R. COVID-19 and Iranian medical students; a survey on  
19 their related-knowledge, preventive behaviors and risk perception. *Archives of Iranian*  
20 *medicine*. 2020 Apr 1;23(4):249-54.  
21  
22
- 23 35. Elhadi M, Mshergahi A, Alsoufi A, Buzreg A, Bouhuwaish A, Khaled A, Alhadi A,  
24 Alameen H, Biala M, Elgherwi A, Elkhafeefi F. Knowledge, preventive behavior and risk  
25 perception regarding COVID-19: a self-reported study on college students. *The Pan*  
26 *African Medical Journal*. 2020 Jun 11;35(75).  
27  
28
- 29 36. Khasawneh AI, Humeidan AA, Alsulaiman JW, Bloukh S, Ramadan M, Al-Shatanawi TN,  
30 Awad HH, Hijazi WY, Al-Kammash KR, Obeidat N, Saleh T. Medical students and  
31 COVID-19: Knowledge, attitudes, and precautionary measures. A descriptive study from  
32 Jordan. *Frontiers in public health*. 2020;8.  
33  
34
- 35 37. Naseef HA, Hadba LS, Humos LA, Shaheen RN, Mitwasi TT, El-Khairi L. Knowledge,  
36 attitudes and practices about Coronavirus disease (COVID-19) among Birzeit University  
37 students: A cross-sectional study.  
38  
39
- 40 38. Hiller J, Schatz K, Drexler H. Gender influence on health and risk behavior in primary  
41 prevention: a systematic review. *Journal of Public Health*. 2017 Aug 1;25(4):339-49.  
42  
43
- 44 39. Vaidya V, Partha G, Karmakar M. Gender differences in utilization of preventive care  
45 services in the United States. *Journal of women's health*. 2012 Feb 1;21(2):140-5.  
46  
47
- 48 40. Peng Y, Pei C, Zheng Y, Wang J, Zhang K, Zheng Z, Zhu P. Knowledge, attitude and  
49 practice associated with COVID-19 among university students: a cross-sectional survey in  
50 China.  
51  
52  
53  
54  
55  
56  
57

## Tables

**Table 1:** Socio-demographic characteristics of secondary school students in Gondar City, Northwest Ethiopia, 2021 (n=370).

| Variables           | Description              | Knowledge about COVID-19 |                |            | Total frequency (%) |
|---------------------|--------------------------|--------------------------|----------------|------------|---------------------|
|                     |                          | Poor n (%)               | Moderate n (%) | Good n (%) |                     |
| Age                 | 15-19                    | 150 (84.7)               | 95 (89.6)      | 77 (88.5)  | 322 (87.0)          |
|                     | 20-30                    | 27 (15.3)                | 11 (10.4)      | 10 (11.5)  | 48 (13.0)           |
| Sex                 | Male                     | 87 (49.2)                | 50 (47.2)      | 41 (47.1)  | 178 (48.1)          |
|                     | Female                   | 90 (50.8)                | 56 (52.8)      | 46 (52.9)  | 192 (51.9)          |
| Marital status      | Single                   | 142 (80.2)               | 96 (90.6)      | 75 (86.2)  | 313 (84.6)          |
|                     | Engaged/married          | 35 (19.8)                | 10 (9.4)       | 12 (13.8)  | 57 (15.4)           |
| Grade               | 10th                     | 80 (45.2)                | 39 (36.8)      | 38 (43.7)  | 157(42.7)           |
|                     | 11th                     | 39 (22.0)                | 33 (31.1)      | 21 (24.1)  | 93 (25.2)           |
|                     | 12th                     | 58 (32.8)                | 34 (32.1)      | 28 (32.2)  | 120 (32.1)          |
| Religion            | Orthodox                 | 161 (90.9)               | 91 (85.8)      | 72 (82.8)  | 324 (87.6)          |
|                     | Muslim                   | 14 (7.9)                 | 13 (12.3)      | 12 (13.8)  | 39 (10.5)           |
|                     | Others                   | 2 (1.2)                  | 2 (1.9)        | 3 (3.4)    | 7 (1.9)             |
| Mother's occupation | Housewife                | 126 (71.2)               | 75 (70.8)      | 61 (70.1)  | 262 (70.8)          |
|                     | Govt employee            | 20 (11.3)                | 15 (14.2)      | 12 (13.8)  | 47 (12.7)           |
|                     | Marchant                 | 17 (9.6)                 | 9 (8.5)        | 7 (8.1)    | 33 (8.9)            |
|                     | NGO employee             | 5 (2.8)                  | 4 (3.8)        | 4 (4.6)    | 13 (3.5)            |
|                     | Farmer                   | 4 (2.3)                  | 1 (0.9)        | 2 (2.3)    | 7 (1.9)             |
|                     | Other                    | 5 (2.8)                  | 2 (1.9)        | 1 (1.2)    | 8 (2.2)             |
| Father's occupation | Government Employee      | 34 (19.2)                | 28 (26.4)      | 30 (34.5)  | 92 (24.9)           |
|                     | NGO employee             | 17 (9.6)                 | 11 (10.4)      | 14 (16.1)  | 42 (11.4)           |
|                     | Merchant                 | 43 (24.3)                | 29 (27.4)      | 21 (24.1)  | 93 (25.1)           |
|                     | Farmer                   | 72 (40.7)                | 31 (29.3)      | 18 (20.7)  | 121 (32.7)          |
|                     | other                    | 11 (6.2)                 | 7 (6.6)        | 4 (4.6)    | 22 (5.9)            |
| Mother's            | Unable to read and write | 71 (40.1)                | 32 (30.2)      | 28 (32.2)  | 131 (35.4)          |

|                             |                          |            |           |           |            |
|-----------------------------|--------------------------|------------|-----------|-----------|------------|
| educational status          | Able to read and write   | 41 (23.2)  | 32 (30.2) | 16 (18.4) | 89 (24.1)  |
|                             | Primary education        | 31 (17.5)  | 12 (11.3) | 16 (18.4) | 59 (15.9)  |
|                             | Secondary education      | 24 (13.6)  | 18 (17.0) | 17 (19.5) | 59 (15.9)  |
|                             | Diploma and above        | 10 (5.7)   | 12 (11.3) | 10 (11.5) | 32 (8.7)   |
| Father's educational status | Unable to read and write | 39 (22.0)  | 10 (9.4)  | 15 (17.2) | 64 (17.3)  |
|                             | Able to read and write   | 59 (33.3)  | 37 (34.9) | 20 (23.0) | 116 (31.4) |
|                             | Primary education        | 27 (15.2)  | 20 (18.9) | 12 (13.8) | 59 (15.9)  |
|                             | Secondary education      | 34 (19.2)  | 23 (21.7) | 13 (14.9) | 70 (18.9)  |
|                             | Diploma and above        | 18 (10.2)  | 16 (15.1) | 27 (31.0) | 61 (16.5)  |
| Living arrangement          | With mother/father       | 103 (58.2) | 70 (66.0) | 64 (73.6) | 237 (64.1) |
|                             | With siblings            | 25 (14.1)  | 13 (12.3) | 11 (12.6) | 49 (13.2)  |
|                             | With relatives           | 14 (7.9)   | 12 (11.3) | 5 (5.8)   | 31 (8.4)   |
|                             | Alone                    | 31 (17.5)  | 8 (7.6)   | 4 (4.6)   | 43 (11.6)  |
|                             | Other                    | 4 (2.3)    | 3 (2.8)   | 3 (3.5)   | 10 (2.7)   |

**Table 2:** Knowledge about COVID-19 among secondary school students in Gondar City, Northwest Ethiopia, 2021 (N= 370).

| S.no | Knowledge Items                                                                                                                                                            | Frequency (%) |            |
|------|----------------------------------------------------------------------------------------------------------------------------------------------------------------------------|---------------|------------|
|      |                                                                                                                                                                            | Wrong         | Correct    |
| K1   | Main clinical symptoms of COVID-19 are fever, cough, shortness of breath, and fatigue                                                                                      | 45 (12.2)     | 325 (87.8) |
| K2   | Unlike the common cold, stuffy nose, runny nose, and sneezing are less common in persons infected with the COVID-19 virus                                                  | 221(59.7)     | 149 (40.3) |
| K3   | COVID-19 symptoms appear within 2–14 days                                                                                                                                  | 120 (32.4)    | 250 (67.6) |
| K4   | Currently, there is no effective treatment or vaccine for COVID-2019, but early symptomatic and supportive treatment can help most patients to recover from the infection. | 160 (43.2)    | 210 (56.8) |
| K5   | Not all persons with COVID-19 will develop severe cases. Those who are elderly, have chronic illnesses, and with suppressed immunity are more likely to be severe cases    | 184 (49.7)    | 186 (50.3) |
| K6   | The corona virus can infect children and adolescents.                                                                                                                      | 136 (36.8)    | 234 (63.2) |
| K7   | Touching or shaking hands of an infected person would result in the infection by the COVID-19 virus.                                                                       | 108 (29.2)    | 262 (70.8) |
| K8   | Touching an object or surface with the virus on it, then touching your mouth, nose, or eyes with the unwashed hand would result in the infection by the COVID-19 virus     | 63 (17.0)     | 307 (83.0) |
| K9   | The COVID-19 virus spreads via respiratory droplets of infected individuals through the air during sneezing or coughing of infected patients.                              | 75 (20.3)     | 295 (79.7) |
| K10  | Persons with COVID-19 cannot infect the virus to others if he has no any symptom of COVID-19                                                                               | 97 (26.2)     | 273 (73.8) |
| K11  | Wearing masks when moving out of home is important to prevent the infection with COVID-19 virus                                                                            | 126 (34.1)    | 244 (65.9) |
| K12  | Children and young adults do not need to take measures to prevent the infection by the COVID-19 virus                                                                      | 101 (27.3)    | 269 (72.7) |
| K13  | To prevent the COVID-19 infection, individuals should avoid going to crowded places such as public transportations, religious places, Hospitals and Workplaces             | 100 (27.0)    | 270 (73.0) |
| K14  | Washing hands frequently with soap and water for at least 20 seconds or use an alcohol-based hand sanitizer (60%) is important to prevent infection with COVID-19          | 123 (33.2)    | 247(66.8)  |
| K15  | Traveling to an infectious area or having contact with someone traveled to an area where the infection present is a risk for developing an infection                       | 98 (26.5)     | 272 (73.5) |

1  
2  
3  
4  
5  
6  
7  
8  
9  
10  
11  
12  
13  
14  
15  
16  
17  
18  
19  
20  
21  
22  
23  
24  
25  
26  
27  
28  
29  
30  
31  
32  
33  
34  
35  
36  
37  
38  
39  
40  
41  
42  
43  
44  
45  
46  
47  
48  
49  
50  
51  
52  
53  
54  
55  
56  
57  
58  
59  
60

|     |                                                                                                                                 |           |            |
|-----|---------------------------------------------------------------------------------------------------------------------------------|-----------|------------|
| K16 | Isolation and treatment of people who are infected with the COVID-19 virus are effective ways to reduce the spread of the virus | 78 (21.1) | 292 (78.9) |
| K17 | People who have contact with someone infected with the COVID-19 virus should be immediately isolated in a proper place.         | 85 (23.0) | 285 (77.0) |

For peer review only

**Table 3:** Predictors of knowledge about COVID-19 among secondary school students in Gondar City, North West Ethiopia, 2021 (n=370)

| Variable                                    |                                               | Regression coefficient | Standard error | p-value | Adjusted Odds ratio | 95% CI for AOR |
|---------------------------------------------|-----------------------------------------------|------------------------|----------------|---------|---------------------|----------------|
| <b>Age</b>                                  | 15-19 (ref.)                                  |                        |                |         |                     |                |
|                                             | 20-30                                         | 0.19                   | .34            | 0.58    | 1.21                | 0.62, 2.37     |
| <b>Marital status</b>                       | Single (ref.)                                 |                        |                |         |                     |                |
|                                             | Engaged/married                               | -0.75                  | 0.33           | 0.02    | 0.47                | 0.25, 0.90     |
| <b>Religion</b>                             | Orthodox (ref.)                               |                        |                |         |                     |                |
|                                             | Muslim                                        | 0.40                   | 0.35           | 0.25    | 1.46                | 0.74, 2.89     |
|                                             | Other*                                        | 2.04                   | 0.84           | 0.01    | 7.71                | 1.50, 39.66    |
| <b>Father's educational status</b>          | Unable to read and write (ref.)               |                        |                |         |                     |                |
|                                             | Able to read and write                        | 0.28                   | 0.33           | 0.39    | 1.33                | 0.69, 2.55     |
|                                             | Completed primary school                      | 0.22                   | 0.39           | 0.57    | 1.24                | 0.58, 2.66     |
|                                             | Completed secondary school                    | 0.06                   | 0.39           | 0.89    | 1.06                | 0.49, 2.30     |
| <b>Father's occupation</b>                  | Diploma and higher Government Employee (ref.) | 0.94                   | 0.44           | 0.03    | 2.56                | 1.07, 6.12     |
|                                             | NGO employee                                  | 0.29                   | 0.38           | 0.44    | 1.34                | 0.64, 2.80     |
|                                             | Merchant                                      | -0.44                  | 0.33           | 0.18    | 0.64                | 0.34, 1.23     |
|                                             | Farmer                                        | -0.41                  | 0.37           | 0.27    | 0.67                | 0.32, 1.38     |
|                                             | Other                                         | -0.75                  | 0.48           | 0.12    | 0.47                | 0.18, 1.20     |
| <b>Living arrangement</b>                   | Parents (ref.)                                |                        |                |         |                     |                |
|                                             | Siblings                                      | -0.26                  | 0.33           | 0.44    | 0.77                | 0.41, 1.47     |
|                                             | Relatives                                     | -0.30                  | 0.38           | 0.44    | 0.74                | 0.35, 1.57     |
|                                             | Alone                                         | -1.14                  | 0.40           | 0.00    | 0.32                | 0.15, 0.69     |
| <b>Source of information about COVID-19</b> | Others                                        | -0.27                  | 0.66           | 0.69    | 0.77                | 0.21, 2.77     |
|                                             | Facebook (ref.)                               |                        |                |         |                     |                |
|                                             | Telegram                                      | 0.81                   | 0.59           | 0.17    | 2.24                | 0.70, 7.13     |
|                                             | Television                                    | 1.89                   | 0.46           | 0.00    | 6.68                | 2.73, 16.36    |
|                                             | Radio                                         | 1.07                   | 0.52           | 0.04    | 2.91                | 1.04, 8.11     |
|                                             | Health professionals                          | 1.42                   | 0.52           | 0.01    | 4.15                | 1.51, 11.40    |
| <b>Cut 1</b>                                |                                               | 1.21                   | 0.60           |         |                     | 0.04, 2.38     |
| <b>Cut 2</b>                                |                                               | 2.67                   | 0.61           |         |                     | 1.48, 3.86     |

\*Other: Catholic and Protestant



**Table 4:** Predictors of COVID-19 preventive health behaviors among secondary school students in Gondar City, North West Ethiopia, 2021 (n=370)

| Variable                                                | Unstandardize<br>d B            | Standardize<br>d $\beta$ | 95% CI for B |
|---------------------------------------------------------|---------------------------------|--------------------------|--------------|
| <b>Sex</b>                                              | Male (ref.)                     |                          |              |
|                                                         | Female                          | 1.35*                    | 0.11         |
| <b>Age</b>                                              | 15-19 (ref.)                    |                          |              |
|                                                         | 20-30                           | 0.73                     | 0.04         |
| <b>Marital<br/>status</b>                               | Single (ref.)                   |                          |              |
|                                                         | Engaged/married                 | 1.64                     | 0.10         |
| <b>Grade</b>                                            | 10 <sup>th</sup> (ref.)         |                          |              |
|                                                         | 11 <sup>th</sup>                | -0.61                    | -0.04        |
|                                                         | 12 <sup>th</sup>                | 0.17                     | 0.01         |
| <b>Mother's<br/>educational<br/>status</b>              | Unable to read and write (ref.) |                          |              |
|                                                         | Able to read and write          | -1.16                    | -0.08        |
|                                                         | Completed primary school        | -0.98                    | -0.06        |
|                                                         | Completed secondary school      | -1.33                    | -0.08        |
|                                                         | Diploma and higher              | -1.82                    | -0.08        |
| <b>Father's<br/>educational<br/>status</b>              | Unable to read and write (ref.) |                          |              |
|                                                         | Able to read and write          | 0.18                     | 0.01         |
|                                                         | Completed primary school        | 0.46                     | 0.03         |
|                                                         | Completed secondary school      | -0.90                    | -0.06        |
|                                                         | Diploma and higher              | -1.20                    | -0.07        |
| <b>Mother's<br/>occupation</b>                          | Housewife (ref.)                |                          |              |
|                                                         | Govt employee                   | -0.72                    | -0.04        |
|                                                         | Marchant                        | -1.17                    | -0.05        |
|                                                         | NGO employee                    | 2.14                     | 0.06         |
|                                                         | Farmer                          | 0.52                     | 0.01         |
|                                                         | Other                           | 1.07                     | 0.03         |
| <b>Father's<br/>occupation</b>                          | Government Employee (ref.)      |                          |              |
|                                                         | NGO employee                    | -2.37*                   | -0.12        |
|                                                         | Merchant                        | -0.25                    | -0.02        |
|                                                         | Farmer                          | -0.59                    | -0.04        |
|                                                         | Other                           | -3.46*                   | -0.13        |
| <b>Living<br/>arrangement</b>                           | Parents (ref.)                  |                          |              |
|                                                         | Siblings                        | 0.60                     | 0.03         |
|                                                         | Relatives                       | -0.53                    | -0.02        |
|                                                         | Alone                           | 0.02                     | 0.01         |
|                                                         | Others                          | 2.42                     | 0.06         |
| <b>Source of<br/>information<br/>about<br/>COVID-19</b> | Facebook (ref.)                 |                          |              |
|                                                         | Telegram                        | -0.41                    | -0.02        |
|                                                         | Television                      | 0.92                     | 0.07         |
|                                                         | Radio                           | -0.12                    | -0.01        |
|                                                         | Health professionals            | 3.00*                    | 0.17         |

|   |                 |            |       |              |
|---|-----------------|------------|-------|--------------|
| 1 |                 |            |       |              |
| 2 |                 |            |       |              |
| 3 |                 |            |       |              |
| 4 | <b>Social</b>   | 10.32±2.30 | 0.29  | 0.11         |
| 5 | <b>support</b>  |            |       | -0.01, 0.58  |
| 6 | <b>Constant</b> |            | 19.84 | 15.16, 24.53 |

7 \*p<0.05, ref. =reference

8

9

10

11

12

13

14

15

16

17

18

19

20

21

22

23

24

25

26

27

28

29

30

31

32

33

34

35

36

37

38

39

40

41

42

43

44

45

46

47

48

49

50

51

52

53

54

55

56

57

58

59

60

For peer review only

1  
2  
3 **Figures legends**  
4

5 **Figure 1:** Source of information about COVID-19 among secondary school students in Gondar  
6 City, Northwest Ethiopia, 2021 (N=370).  
7

8 **Figure 2:** Knowledge status about COVID-19 among secondary school students in Gondar City,  
9 Northwest Ethiopia, 2021 (N= 370).  
10  
11  
12  
13  
14  
15  
16  
17  
18  
19  
20  
21  
22  
23  
24  
25  
26  
27  
28  
29  
30  
31  
32  
33  
34  
35  
36  
37  
38  
39  
40  
41  
42  
43  
44  
45  
46  
47  
48  
49  
50  
51  
52  
53  
54  
55  
56  
57

**Figures**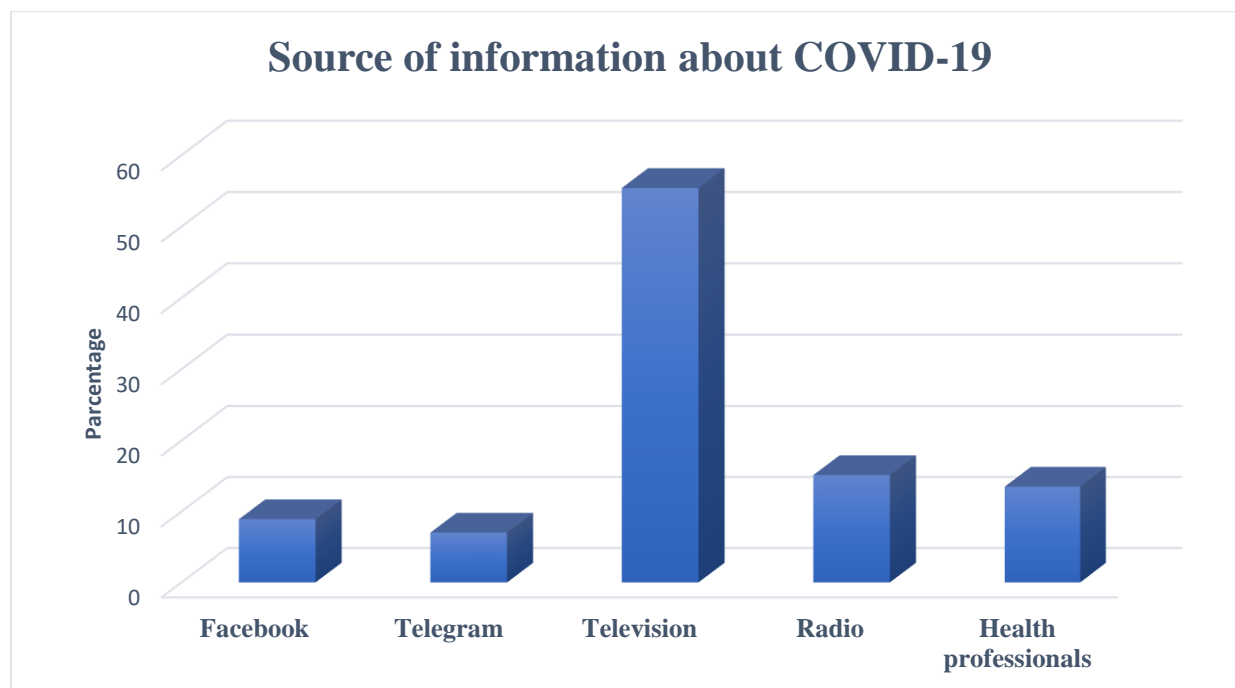

**Figure 1:** Source of information about COVID-19 among secondary school students in Gondar City, Northwest Ethiopia, 2021 (N=370).

1  
2  
3  
4  
5  
6  
7  
8  
9  
10  
11  
12  
13  
14  
15  
16  
17  
18  
19  
20  
21  
22  
23  
24  
25  
26  
27  
28  
29  
30  
31  
32  
33  
34  
35  
36  
37  
38  
39  
40  
41  
42  
43  
44  
45  
46  
47  
48  
49  
50  
51  
52  
53  
54  
55  
56  
57  
58  
59  
60

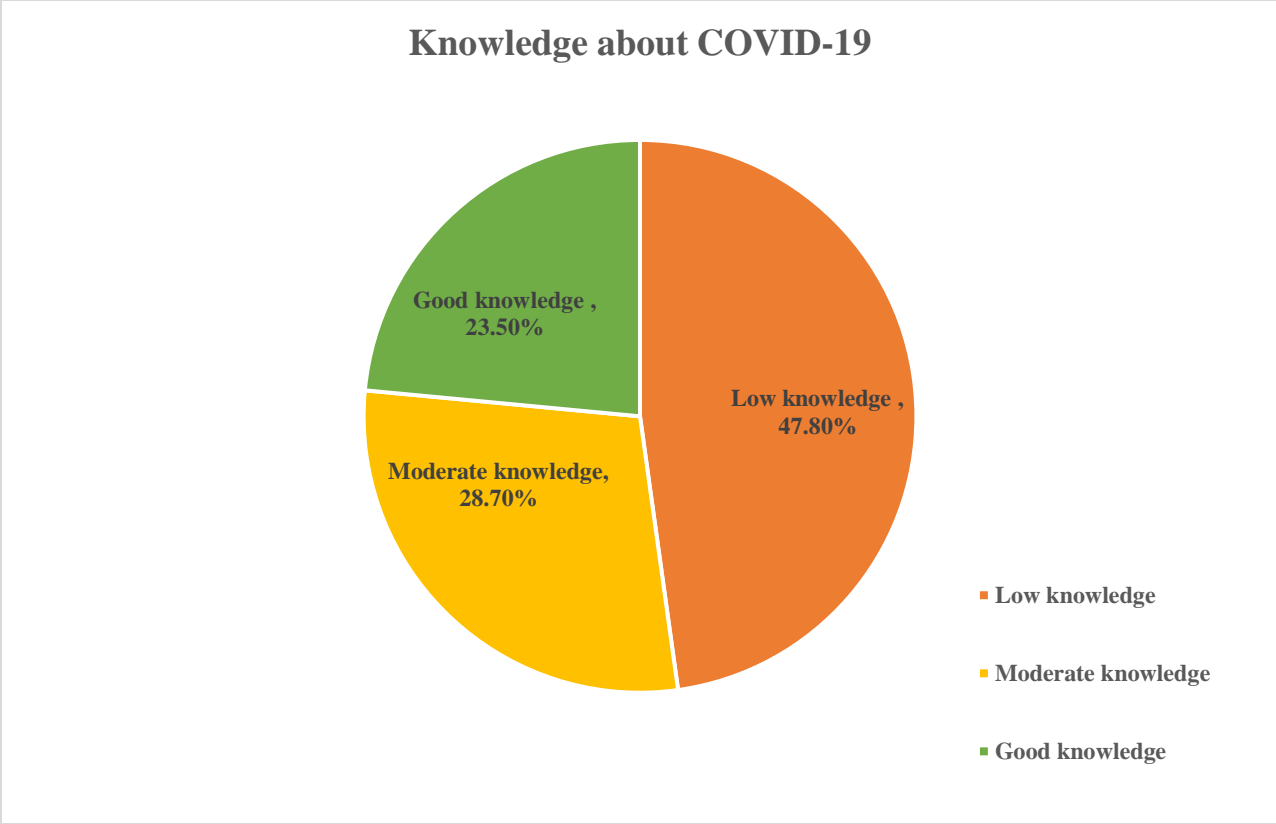

**Figure 2:** Knowledge status about COVID-19 among secondary school students in Gondar City, Northwest Ethiopia, 2021 (N= 370).

## STROBE Statement—checklist of items that should be included in reports of observational studies

|                           | Item No. | Recommendation                                                                                                                                                                                    | Page No. |
|---------------------------|----------|---------------------------------------------------------------------------------------------------------------------------------------------------------------------------------------------------|----------|
| <b>Title and abstract</b> | 1        | (a) Indicate the study's design with a commonly used term in the title or the abstract                                                                                                            | 2        |
|                           |          | (b) Provide in the abstract an informative and balanced summary of what was done and what was found                                                                                               | 2        |
| <b>Introduction</b>       |          |                                                                                                                                                                                                   |          |
| Background/rationale      | 2        | Explain the scientific background and rationale for the investigation being reported                                                                                                              | 4, 5     |
| Objectives                | 3        | State specific objectives, including any pre-specified hypotheses                                                                                                                                 | 5        |
| <b>Methods</b>            |          |                                                                                                                                                                                                   |          |
| Study design              | 4        | Present key elements of study design early in the paper                                                                                                                                           | 6        |
| Setting                   | 5        | Describe the setting, locations, and relevant dates, including periods of recruitment, exposure, follow-up, and data collection                                                                   | 6        |
| Participants              | 6        | (a) Give the eligibility criteria, and the sources and methods of selection of participants                                                                                                       | 6        |
| Variables                 | 7        | Clearly define all outcomes, exposures, predictors, potential confounders, and effect modifiers. Give diagnostic criteria, if applicable                                                          | 6        |
| Data sources/measurement  | 8*       | For each variable of interest, give sources of data and details of methods of assessment (measurement). Describe comparability of assessment methods if there is more than one group              | 6, 7     |
| Bias                      | 9        | Describe any efforts to address potential sources of bias                                                                                                                                         | 7        |
| Study size                | 10       | Explain how the study size was arrived at                                                                                                                                                         | 6        |
| Quantitative variables    | 11       | Explain how quantitative variables were handled in the analyses. If applicable, describe which groupings were chosen and why                                                                      | 7        |
| Statistical methods       | 12       | (a) Describe all statistical methods, including those used to control for confounding                                                                                                             | 7        |
|                           |          | (b) Describe any methods used to examine subgroups and interactions                                                                                                                               | N/A      |
|                           |          | (c) Explain how missing data were addressed                                                                                                                                                       | N/A      |
|                           |          | (d) If applicable, describe analytical methods taking account of sampling strategy                                                                                                                | N/A      |
|                           |          | (e) Describe any sensitivity analyses                                                                                                                                                             | N/A      |
| <b>Results</b>            |          |                                                                                                                                                                                                   |          |
| Participants              | 13*      | (a) Report numbers of individuals at each stage of study—eg numbers potentially eligible, examined for eligibility, confirmed eligible, included in the study, completing follow-up, and analysed | 8        |
|                           |          | (b) Give reasons for non-participation at each stage                                                                                                                                              | 8        |
|                           |          | (c) Consider use of a flow diagram                                                                                                                                                                | N/A      |
| Descriptive data          | 14*      | (a) Give characteristics of study participants (eg demographic, clinical, social) and information on exposures and potential confounders                                                          | 8        |
|                           |          | (b) Indicate number of participants with missing data for each variable of interest                                                                                                               | N/A      |
| Outcome data              | 15*      | Report numbers of outcome events or summary measures                                                                                                                                              | 8        |

|    |                          |    |                                                                                                                                                                                                              |        |
|----|--------------------------|----|--------------------------------------------------------------------------------------------------------------------------------------------------------------------------------------------------------------|--------|
| 1  |                          |    |                                                                                                                                                                                                              |        |
| 2  |                          |    |                                                                                                                                                                                                              |        |
| 3  |                          |    |                                                                                                                                                                                                              |        |
| 4  |                          |    |                                                                                                                                                                                                              |        |
| 5  |                          |    |                                                                                                                                                                                                              |        |
| 6  |                          |    |                                                                                                                                                                                                              |        |
| 7  |                          |    |                                                                                                                                                                                                              |        |
| 8  |                          |    |                                                                                                                                                                                                              |        |
| 9  |                          |    |                                                                                                                                                                                                              |        |
| 10 |                          |    |                                                                                                                                                                                                              |        |
| 11 |                          |    |                                                                                                                                                                                                              |        |
| 12 |                          |    |                                                                                                                                                                                                              |        |
| 13 |                          |    |                                                                                                                                                                                                              |        |
| 14 |                          |    |                                                                                                                                                                                                              |        |
| 15 |                          |    |                                                                                                                                                                                                              |        |
| 16 |                          |    |                                                                                                                                                                                                              |        |
| 17 |                          |    |                                                                                                                                                                                                              |        |
| 18 |                          |    |                                                                                                                                                                                                              |        |
| 19 |                          |    |                                                                                                                                                                                                              |        |
| 20 |                          |    |                                                                                                                                                                                                              |        |
| 21 |                          |    |                                                                                                                                                                                                              |        |
| 22 |                          |    |                                                                                                                                                                                                              |        |
| 23 |                          |    |                                                                                                                                                                                                              |        |
| 24 |                          |    |                                                                                                                                                                                                              |        |
| 25 |                          |    |                                                                                                                                                                                                              |        |
| 26 |                          |    |                                                                                                                                                                                                              |        |
| 27 |                          |    |                                                                                                                                                                                                              |        |
| 28 |                          |    |                                                                                                                                                                                                              |        |
| 29 |                          |    |                                                                                                                                                                                                              |        |
| 30 |                          |    |                                                                                                                                                                                                              |        |
| 31 |                          |    |                                                                                                                                                                                                              |        |
| 32 |                          |    |                                                                                                                                                                                                              |        |
| 33 |                          |    |                                                                                                                                                                                                              |        |
| 34 |                          |    |                                                                                                                                                                                                              |        |
| 35 |                          |    |                                                                                                                                                                                                              |        |
| 36 |                          |    |                                                                                                                                                                                                              |        |
| 37 |                          |    |                                                                                                                                                                                                              |        |
| 38 |                          |    |                                                                                                                                                                                                              |        |
| 39 |                          |    |                                                                                                                                                                                                              |        |
| 40 |                          |    |                                                                                                                                                                                                              |        |
| 41 |                          |    |                                                                                                                                                                                                              |        |
| 42 |                          |    |                                                                                                                                                                                                              |        |
| 43 |                          |    |                                                                                                                                                                                                              |        |
| 44 |                          |    |                                                                                                                                                                                                              |        |
| 45 |                          |    |                                                                                                                                                                                                              |        |
| 46 |                          |    |                                                                                                                                                                                                              |        |
| 47 |                          |    |                                                                                                                                                                                                              |        |
| 48 |                          |    |                                                                                                                                                                                                              |        |
| 49 |                          |    |                                                                                                                                                                                                              |        |
| 50 |                          |    |                                                                                                                                                                                                              |        |
| 51 |                          |    |                                                                                                                                                                                                              |        |
| 52 |                          |    |                                                                                                                                                                                                              |        |
| 53 |                          |    |                                                                                                                                                                                                              |        |
| 54 |                          |    |                                                                                                                                                                                                              |        |
| 55 |                          |    |                                                                                                                                                                                                              |        |
| 56 |                          |    |                                                                                                                                                                                                              |        |
| 57 |                          |    |                                                                                                                                                                                                              |        |
| 58 |                          |    |                                                                                                                                                                                                              |        |
| 59 |                          |    |                                                                                                                                                                                                              |        |
| 60 |                          |    |                                                                                                                                                                                                              |        |
|    | Main results             | 16 | (a) Give unadjusted estimates and, if applicable, confounder-adjusted estimates and their precision (eg, 95% confidence interval). Make clear which confounders were adjusted for and why they were included | 9      |
|    |                          |    | (b) Report category boundaries when continuous variables were categorized                                                                                                                                    | 8      |
|    |                          |    | (c) If relevant, consider translating estimates of relative risk into absolute risk for a meaningful time period                                                                                             | N/A    |
|    | Other analyses           | 17 | Report other analyses done—eg analyses of subgroups and interactions, and sensitivity analyses                                                                                                               | 8, 9   |
|    | <b>Discussion</b>        |    |                                                                                                                                                                                                              |        |
|    | Key results              | 18 | Summarise key results with reference to study objectives                                                                                                                                                     | 10     |
|    | Limitations              | 19 | Discuss limitations of the study, taking into account sources of potential bias or imprecision. Discuss both direction and magnitude of any potential bias                                                   | 12     |
|    | Interpretation           | 20 | Give a cautious overall interpretation of results considering objectives, limitations, multiplicity of analyses, results from similar studies, and other relevant evidence                                   | 10, 11 |
|    | Generalisability         | 21 | Discuss the generalisability (external validity) of the study results                                                                                                                                        | 10, 11 |
|    | <b>Other information</b> |    |                                                                                                                                                                                                              |        |
|    | Funding                  | 22 | Give the source of funding and the role of the funders for the present study and, if applicable, for the original study on which the present article is based                                                | 13     |

# BMJ Open

## Determinants of COVID-19 related knowledge and preventive behaviors among students in re-opened secondary schools: cross-sectional study

|                                 |                                                                                                                                                                                                                                                                                                                                                                                                    |
|---------------------------------|----------------------------------------------------------------------------------------------------------------------------------------------------------------------------------------------------------------------------------------------------------------------------------------------------------------------------------------------------------------------------------------------------|
| Journal:                        | <i>BMJ Open</i>                                                                                                                                                                                                                                                                                                                                                                                    |
| Manuscript ID                   | bmjopen-2021-050189.R1                                                                                                                                                                                                                                                                                                                                                                             |
| Article Type:                   | Original research                                                                                                                                                                                                                                                                                                                                                                                  |
| Date Submitted by the Author:   | 25-Mar-2021                                                                                                                                                                                                                                                                                                                                                                                        |
| Complete List of Authors:       | Handebo, Simegnaw; University of Gondar, Department of Health Education and Behavioral Sciences<br>Adugnaw, Asmamaw; University of Gondar, Department of Health Education and Behavioral Sciences<br>Kassie, Ayenew; University of Gondar, Department of Health Education and Behavioral Sciences<br>Shitu, Kegnigie; University of Gondar, Department of Health Education and Behavioral Sciences |
| <b>Primary Subject Heading</b>: | Public health                                                                                                                                                                                                                                                                                                                                                                                      |
| Secondary Subject Heading:      | Global health, Infectious diseases                                                                                                                                                                                                                                                                                                                                                                 |
| Keywords:                       | COVID-19, PUBLIC HEALTH, PREVENTIVE MEDICINE                                                                                                                                                                                                                                                                                                                                                       |
|                                 |                                                                                                                                                                                                                                                                                                                                                                                                    |

SCHOLARONE™  
Manuscripts





I, the Submitting Author has the right to grant and does grant on behalf of all authors of the Work (as defined in the below author licence), an exclusive licence and/or a non-exclusive licence for contributions from authors who are: i) UK Crown employees; ii) where BMJ has agreed a CC-BY licence shall apply, and/or iii) in accordance with the terms applicable for US Federal Government officers or employees acting as part of their official duties; on a worldwide, perpetual, irrevocable, royalty-free basis to BMJ Publishing Group Ltd ("BMJ") its licensees and where the relevant Journal is co-owned by BMJ to the co-owners of the Journal, to publish the Work in this journal and any other BMJ products and to exploit all rights, as set out in our [licence](#).

The Submitting Author accepts and understands that any supply made under these terms is made by BMJ to the Submitting Author unless you are acting as an employee on behalf of your employer or a postgraduate student of an affiliated institution which is paying any applicable article publishing charge ("APC") for Open Access articles. Where the Submitting Author wishes to make the Work available on an Open Access basis (and intends to pay the relevant APC), the terms of reuse of such Open Access shall be governed by a Creative Commons licence – details of these licences and which [Creative Commons](#) licence will apply to this Work are set out in our licence referred to above.

Other than as permitted in any relevant BMJ Author's Self Archiving Policies, I confirm this Work has not been accepted for publication elsewhere, is not being considered for publication elsewhere and does not duplicate material already published. I confirm all authors consent to publication of this Work and authorise the granting of this licence.

1  
2  
3 1 **Determinants of COVID-19 related knowledge and preventive behaviors among**  
4 **students in re-opened secondary schools: cross-sectional study**  
5  
6

7  
8 3 **Simegnew Handebo <sup>1\*</sup> Asmamaw Adugnaw<sup>1</sup> Ayenew Kassie<sup>1</sup> Kegnie Shitu<sup>1</sup>**  
9

10 4 <sup>1</sup> Department of Health Education and Behavioral Sciences, Institute of public health, College of  
11 Medicine and Health Science, University of Gondar, Gondar, Ethiopia.  
12  
13

14 6

15 7

16 8

17  
18  
19 9 **Email addresses:**

20 10 Simegnew Handebo (SH): [hsimegnew@yahoo.com](mailto:hsimegnew@yahoo.com)

21 11 Asmamaw Adugna (AA): [asmamaw2727@gmail.com](mailto:asmamaw2727@gmail.com)

22 12 Ayenew Kassie (AK): [kassieayenew@gmail.com](mailto:kassieayenew@gmail.com)

23 13 Kegnie Shitu (KS): [kegnsh@gmail.com](mailto:kegnsh@gmail.com)  
24  
25  
26  
27  
28  
29  
30  
31  
32  
33  
34

35 17 **\*Corresponding author (SH)**

36 18 Email: [hsimegnew@yahoo.com](mailto:hsimegnew@yahoo.com)

37 19 P.O.Box- 196

38 20 Telephone: +251-912-490659  
39  
40  
41  
42  
43  
44  
45  
46  
47  
48  
49  
50  
51  
52  
53  
54  
55  
56  
57  
58  
59  
60

## 1 Abstract

2 **Purpose:** In Ethiopia, more than 26 million students have been out of the classroom for nearly  
3 nine months. On September 18th, the Ethiopian Minister of Health advised the Parliament the  
4 possibility of reopening schools provided certain conditions were met. Schools are currently  
5 reopening in the country for the first time since March, 2020.

6 **Objective:** This study assessed the knowledge and preventive health behaviors toward COVID-  
7 19 and associated factors among secondary school students.

8 **Design, setting, participants, and outcome measures:** An institution-based cross-sectional  
9 study was conducted from October to December, 2020 in Gondar city, Northwest Ethiopia. A total  
10 of 370 secondary school students were included. Bivariable and multivariable ordinal logistic  
11 regression model were fitted to identify the predictors of knowledge about COVID-19. Simple and  
12 multiple linear regression analysis were done to identify factors associated with preventive  
13 behavior. A p-value of less than 0.05 was used to declare statistical significance.

14 **Results:** Only one fourth (23.5%, 95%CI: 19.5, 28.1) of the participants had a good knowledge  
15 about COVID-19. The mean score of preventive behavior was  $22.8 \pm SD 6.2$ . Marital status,  
16 religion, father education, living arrangement, and sources of information were significantly  
17 associated with knowledge about COVID-19. Being female and using health professionals as  
18 source of information increased the engagement in preventive behaviors. On the other hand,  
19 student whose father employed in non-governmental organization and other jobs had decreased  
20 engagement in preventive health behaviors.

21 **Conclusion:** Significant number of the students had inadequate knowledge about COVID-19 and  
22 poorly engaged in COVID-19 preventive behavior. Thus, it is suggested to include and disseminate  
23 about COVID-19 in related academic sessions, using school clubs, and mini-medias. The sources  
24 of COVID-19 related information need to strengthen the dissemination of tailored, credible, and  
25 timely message to enhance the knowledge and engagement the student in preventive behaviors.

26

27

28

## 1 **Strengths and limitations of this study**

- 2 • This study assessed the knowledge and preventive health behaviors toward COVID-19 in  
3 re-opened secondary schools.
- 4 • We suggested that the effectiveness of COVID-19 prevention measures need to be  
5 established well-enough among the students.
- 6 • School communities need to admit that at the time when access to a vaccine isn't  
7 confirmed, adhering to preventive behaviors is the only way of making schools COVID-  
8 safe.
- 9 • Our study may be limited by social desirability bias due to self-report of the participants.
- 10 • Besides, the study could not show a cause-and-effect relationship, and the findings  
11 represent the situation during the study period.

## 1 BACKGROUND

2 The novel Coronavirus (SARS-CoV-2 or COVID-19) was first reported in December 2019, in  
3 Wuhan, Hubei Province, China [1]. The World Health Organization (WHO) declared the  
4 coronavirus disease as a global pandemic on March 11, 2020 [2]. The coronavirus COVID-19 is  
5 affecting 219 countries and nowadays, it is a public health emergency throughout the world [3].  
6 The fast spread of the disease has taken so many lives and caused massive disruption to families,  
7 societies, and economies all over the world [4]. The latest statistics reveal that coronavirus has  
8 infected more than 101,457,202 people until 21 January, 2021, and led to the deaths of more than  
9 2,184,619 people worldwide [3].

10 The Ethiopian Minister of Health announced the first confirmed the first case of COVID-19 in  
11 Ethiopia on March 13, 2020 [5, 6]. Then after the government of Ethiopia took different public  
12 health measures to prevent the spread of the disease. All primary, secondary and tertiary  
13 educational institutions across the country were closed and all public gatherings including sports  
14 were banned, impacting more than 26 million students. Hand washing and social distancing were  
15 the main preventive measures communicated to the general public [7, 8]. On April 8, 2020  
16 Ethiopian government declared a State of emergency to intensify the control and prevention of the  
17 spread of the disease [5]. As of January 27, 2020, there were 134,569 confirmed cases of COVID-  
18 19 cases and 2,075 confirmed deaths from the disease [9].

19 On September 18th, the Ethiopian Minister of Health advised Parliament that it was possible to  
20 reopen schools provided certain conditions were met. The ministry adapted the global guidance  
21 for reopening school to make the schools safer and established structures to facilitate the process  
22 of reopening [10]. The knowledge on mode of disease transmission, basic hygiene principles and  
23 other public health measures are important for effective control measures [11]. The government of  
24 Ethiopia is using different strategies to enhance the knowledge, attitude and practices towards  
25 COVID-19 prevention measures and are not motivating the response to COVID-19 [5, 12].

26 During such pandemic the WHO advices everybody to take responsibility and adopt protective  
27 behaviors [13]. The lack of knowledge about the disease would be one of the most common driving  
28 factors for poor adoption of COVID-19 prevention measures and may increase the spread of the  
29 disease as well as the number of new cases [14, 15]. Studies conducted in Ethiopian reported  
30 contradicting findings regarding knowledge and practices towards COVID-19 preventive

1  
2  
3 1 measures among different population [16]. Some reported the existence of good knowledge about  
4  
5 2 COVID-19 and level of prevention practice [17] while others reported poor knowledge and poor  
6  
7 3 practice related to COVID-19 preventive practice [16-18]. Some studies suggest to consider  
8  
9 4 individuals risk perception as a major factor to promote the adherence of preventive measures [5,  
10  
11 5 12, 19].

12  
13 6 Secondary school students have poor knowledge and healthy preventive practices towards  
14  
15 7 COVID-19. The exposure to education intervention had improved knowledge, attitude, and  
16  
17 8 practice of the students [20]. On the other hand, high school students in Ghana had substantial  
18  
19 9 level of knowledge and positive perception of COVID-19 [21]. A couple studies in Europe  
20  
21 10 revealed secondary school present a good level of knowledge, shows appropriate practice, and  
22  
23 11 positive attitude towards COVID-19 at the time of its outbreak [22, 23].

24  
25 12 The Ethiopian government is using an adopted Risk Communication and Community Engagement  
26  
27 13 (RCCE) strategic approach to empower people to adopt preventive and health-seeking behaviors  
28  
29 14 contributing to a reduction in the spread of COVID-19 [5, 24]. The Ethiopian Ministry of Health  
30  
31 15 and Ethiopian Public Health Institute are proactively working on disseminating prevention  
32  
33 16 messages on radio and television, at federal and regional levels, reaching a potential audience of  
34  
35 17 30 million people [25]. In addition, volunteers conducted mobilization activities against COVID-  
36  
37 18 19 in marketplaces, slums and congested public places [26]. However, the knowledge and practices  
38  
39 19 towards COVID-19 among the public is not sufficient enough to tackle the rapidly transmitted  
40  
41 20 disease and undermined the preparedness and responses in the country [5].

42  
43 21 In Ethiopia Schools are reopening after several months of closure. As schools reopen, strict  
44  
45 22 precautionary measures are in place to protect students, teachers, non-teaching staff within the  
46  
47 23 school and community from COVID-19. In such case, the reopening of schools brings an  
48  
49 24 opportunity to empower students as agents of change to adopt the recommended positive behaviors  
50  
51 25 to prevent the spread of COVID-19 [27]. Improved awareness and adaption of preventive  
52  
53 26 behaviors among students facilitate positive changes in the general population thru health  
54  
55 27 messages and observation learning. Therefore, we need to understand the magnitude of COVID-  
56  
57 28 19 related knowledge and preventive practice among students in the re-opened high schools. In  
58  
59 29 addition, we also assessed whether socio demographic, social support, and source of COVID-19

1  
2  
3 1 related information were associated with the knowledge, and preventive health behavior towards  
4  
5 2 COVID-19.

### 6 7 3 **METHODS**

#### 8 9 10 4 **Study design and area**

11  
12 5 An institutional based cross-sectional study design was conducted in Gondar city from November  
13  
14 6 to December 2020. Gondar city administration is located at about 727 km away from Addis Ababa,  
15  
16 7 the capital city of Ethiopia, and 180 km away from Bahirdar the capital city of Amhara Regional  
17  
18 8 State. In the city there are 12 governments and 5 private high schools (Grade 9 to Grade 12) with  
19  
20 9 more than 23,200 students [28].

#### 21 22 10 **Sample size and sampling procedure**

23  
24 11 The sample size was calculated using a single population proportion formula; considering 50%  
25  
26 12 (since no previous study found) proportion of students who have good preventive health practice  
27  
28 13 towards COVID-19, 95% confidence interval (CI), marginal error (d) of 5%, and 5% non-response  
29  
30 14 rate. The final sample size was estimated to be 403 participants. The adequacy of the sample size  
31  
32 15 for identifying the predictors of COVID-19 related knowledge preventive behavior was evaluated  
33  
34 16 using post-hoc power analysis.

35  
36 17 Stratified simple random sampling technique was used to select the study participants. First,  
37  
38 18 stratification was done based on school ownership into private and governmental schools. Then,  
39  
40 19 four governmental (Fasiledes, Fasiledes Third, Azezo, and Hidar 11) and two private secondary  
41  
42 20 schools (Debreselam and Waliya) were selected on random basis. Finally, study participants were  
43  
44 21 selected randomly based on their class roster using Microsoft excel random number generator.

#### 45 46 22 **Study Variables**

47  
48 23 **Preventive health behaviors:** Refers to the participant's practice concerning, handwashing,  
49  
50 24 physical distancing, facemask wearing, so as to prevent COVID-19 infection. It was measured by  
51  
52 25 eight items having five-point response rate ranging from 1 (Never) to 5 (always). The composite  
53  
54 26 score of the preventive behaviors ranged from 7 to 35. The higher score indicates compliance  
55  
56 27 behavior.

1  
2  
3 1 **Knowledge of COVID-19:** Refers to participant's cognition of symptoms, nature and preventive  
4 measures of COVID-19. It was measured by 17 items having three response categories (1 = True,  
5 2 = False and 3 = I don't know). A correct answer was coded as 1 point whereas, the incorrect and  
6 unknown answer was recoded as zero. The composite score ranged from 0-17 and categorized  
7 using Bloom's cut-off point, as low-level of knowledge (less than 60%; less than 12 score),  
8 moderate level of knowledge (60-80%; 13-14 score) and good level of knowledge (80-100%; 15  
9 and above score) [29].

## 10 **Data collection tools and procedures**

11 The data were collected by using pre-tested self-administered questionnaire adapted from different  
12 literatures [15, 17]. The questionnaire was prepared in English, then translated to the local  
13 language, Amharic. Trained four BSc nurses and two Masters of public health professionals  
14 collected the data and supervised the data collection process, respectively. COVID-19 safety  
15 measures (physical distancing, wearing masks, and hand hygiene) were taken during the data  
16 collection process. The questionnaire had five sections including socio demographic, social  
17 support, source of COVID-19 related information, knowledge, and preventive health behavior.  
18 Content validity and pretest was done with 6 experts panel discussion and 20 students. It was  
19 determined by Item level Content Validity Index (I-CVI) of 0.78 or higher, Scale level Content  
20 Validity Index by Universal Agreement (S-CVI/UA) of 0.8 or higher and Scale level Content  
21 Validity Index by Average (S-CVI/Ave) 0.9 or higher. Data collectors and supervisors took one-  
22 day training on the objective of the study, content of the questionnaire, and ethical issues need to  
23 be taken during the data collection process (See the research tool at **Supplementary file**).

## 24 **Data processing and analysis**

25 Each questionnaire was reviewed for completeness and consistency on daily basis. The internal  
26 consistency of the items was checked by Cronbach's alpha. The collected data entered in to  
27 EpiData version 4.6 and exported into to STATA version 14 statistical software for analysis.  
28 Multicollinearity among the independent variables was assessed using variance inflation factors  
29 (VIF) and was in the acceptable range. Descriptive statistics was used to quantify the magnitude  
30 of preventive healthy behavior, knowledge and describe the characteristic of the participant.  
31 Bivariable and multivariable ordinal logistic regression model was fitted to identify the factors  
32 associated with knowledge of COVID-19. Those variables with a p-value of less than 0.25 in the



1  
2  
3 1 bivariable model were fitted in the multivariable model. The assumptions of ordinary logistic  
4 regression were checked using chi-squared and parallel line tests (the model was well-fitted with  
5 the data). Normality and homogeneity of variances were checked for preventive health behavior  
6 (the variable was normally distributed). Simple linear regression analysis was computed and all  
7 independent variables with p-value less than 0.25 were entered in multiple linear regression. An  
8 unstandardized  $\beta$  coefficient was used to interpret the effect of predictors to preventive health  
9 behavior. Variables with p value less than 0.05 at 95% confidence interval were considered as  
10 statistically significant.

### 11 **Patient and public involvement**

12 This research was done without involving patient on the design and implementation. But the  
13 participants and administrative officials were informed about study objectives. The results will be  
14 disseminated to Gondar City Education Office and through open access publication.

## 15 **RESULTS**

### 16 **Socio demographic characteristics**

17 A total of 370 respondents were participated with a response rate of 91.8%. The non-response was  
18 due to not replying to items on the questionnaire (4.0%), inconsistent responses (2.4%) and not  
19 volunteered without reason (1.8%). More than half of the participant (51.9%) were females. The  
20 higher proportion of the participant were affiliated with Orthodox religion (87.6%), single  
21 (84.6%), and live with their parents (64.1%). The mean age of participants  $18.0 \pm 1.8$  years with the  
22 minimum 15 and maximum 30 years (**Table 1**). With regard to sources of information, television  
23 (55.4%) was the most common source of information about COVID-19 (**Figure 1**).

### 24 **Knowledge about COVID-19**

25 The reliability test of the knowledge about COVID-19 items for Cronbach's alpha was 0.79  
26 According to the Blooms cut-off point nearly half (47.8%) of the participant had low knowledge  
27 about COVID-19. Only one fourth of them (23.5%) had a good knowledge (**Figure 2**). **Table 2**  
28 also presents the details of knowledge about COVID-19.

### 29 **Preventive health behavior**

1 The reliability test of the preventive health behavior items for Cronbach's alpha was 0.79. The  
2 mean of preventive health behavior was 22.8 with standard deviation of 6.2. Two hundred and four  
3 (55.1%, 95% CI: 50.0, 60.2) respondents scored above the mean score of preventive health  
4 behavior (**Table 3**).

### 5 **Predictors of knowledge about COVID-19**

6 Of the variables satisfied the assumption of proportional odds model, age, marital status, religion,  
7 father's educational status, father's occupation, living arrangement, and sources of information for  
8 COVID-19 were associated with knowledge of COVID-19 with a p-value of less than 0.25. After  
9 controlling the confounding variables, marital status, religion, father's education, living  
10 arrangement, and sources of information were significantly associated with knowledge about  
11 COVID-19. The result of ordinal logistic regression analysis showed that the odds of having good  
12 knowledge (verses medium or poor knowledge) were 0.47 times lower for engaged/married  
13 students as compared to single students (AOR=0.47, 95% CI: 0.25, 0.90). The odds of having good  
14 knowledge was nearly 7.71 times higher for students affiliated with other religion as compared to  
15 those affiliated with Orthodox (AOR=1.78, 95%CI: 1.24, 2.55). Students belong to fathers with  
16 diploma and above education were 2.56 times higher odds of good knowledge than students belong  
17 to father with no education (AOR=2.56, 95%CI: 1.07, 6.12). The odds of having good knowledge  
18 was nearly 0.32 times lower for students living alone than those who lived with their parents  
19 (AOR=0.32, 95%CI: 0.15, 0.69). Students who used television (AOR=6.68, 95%CI: 2.73, 16.36),  
20 radio (AOR=2.91, 95%CI: 1.04, 8.11), and health profession (AOR=4.15, 95%CI: 1.51, 11.40) as  
21 sources of information on COVID-19 were 6.68, 2.91, and 4.15 times higher odds of good  
22 knowledge than those who used Facebook, respectively (**Table 4**).

### 23 **Predictors of COVID-19 preventive health behaviors**

24 In simple linear regression, sex, marital status, grade level, mother's educational status, father's  
25 educational status, mother's occupation and father's occupation, living arrangement, source of  
26 information about COVID-19, and social support were significant at with a p-value  $\leq 0.25$  and  
27 entered in to multiple linear regression. In the multiple linear regression analysis, sex ( $\beta$ :1.35 95%  
28 CI: 0.02, 2.68), having father employed in non-governmental organization (NGO) ( $\beta$ : -2.37, 95%  
29 CI: -4.71, -0.02), other jobs ( $\beta$ : -3.46, 95% CI: -6.49, -0.43) and health profession as source of  
30 information ( $\beta$ :3.00, 95% CI: 0.20, 5.80) were statistically significant at a p-value of less than 0.05.

1  
2  
3 1 The standardized regression coefficient revealed that source of information was the most important  
4 predictor of adoption of COVID-19 preventive measures. The analysis of this study showed that  
5 2 female students were 1.35 times more frequently engaged in preventive health behavior than  
6 3 males. Compared to students with father employed in government institution, engagement in  
7 4 COVID-19 preventive behavior decreased by 2.37 and 3.46 times among those whose father was  
8 5 employed in NGO and other jobs, respectively. Students who used health professionals as sources  
9 6 of information were three time more engaged in preventive health behavior than those who use  
10 7 Facebook as source of information provided that other variables are kept constant (**Table 5**).

## 11 9 **DISCUSSION**

12 10 This study assessed the COVID-19 related knowledge and preventive health behavior of the  
13 11 student and associated factors in the reopened schools, Northwest Ethiopia. Student's adherence  
14 12 to COVID-19 preventive behaviors (physical distancing, wearing a mask, and hand washing) are  
15 13 a key to sustain the education in the pandemic era. Previous studies addressed the knowledge,  
16 14 attitude, and practices of COVID-19 immediately after onset of the pandemics in Ethiopia [16-18].  
17 15 These studies revealed lack of knowledge, attitude and preventive practice among different  
18 16 populations [16, 19]. Since the adherence of these behaviors reduce the spread of the disease  
19 17 among the students, teachers, and community, the current study focused the knowledge of the  
20 18 student and their level of engagement in preventive behavior.

21 19 A lack of adequate knowledge is probably the driving force for poor preventive practice as well as  
22 20 the spread of the disease. In this study only about half (52.2%) of the students had at least moderate  
23 21 knowledge about COVID-19. This study result is higher than studies done among health science  
24 22 student in Arbaminch [30] and secondary school student in Egypt (before intervention) [20]. On  
25 23 the other hands, this finding is lower than studied done among college student in Amhara region,  
26 24 undergraduate student in Debre Berhan University, undergraduate medical students in Egypt, high  
27 25 school students in Ghana, Iranian medical students, Libya, Jordan, and Portugal [21-23, 31-36].  
28 26 The discrepancy is may be due difference in access and use of information sources. The result  
29 27 highlights the need to address the gap of knowledge timely using tailored and effective approaches.  
30 28 The authors recommended briefing sessions or including information about the disease is health  
31 29 related subjects/ lessons may enhance the knowledge of the students.

1  
2  
3 1 This study showed students had low preventive health behaviors against COVID-19 with 55.1%  
4  
5 2 respondents scored above the mean score. Contrary to scientific recommendation social distancing,  
6  
7 3 hand washing, and wearing of a mask were not highly prevalent practices among students. Similar  
8  
9 4 finding is reported by studies done among university students in Debre Birhan university [32] and  
10  
11 5 secondary school student in Egypt [20]. Contrary to this study among secondary school students  
12  
13 6 in in Italy [23] and Portugal [22] reported that students are practicing appropriate preventive  
14  
15 7 behaviors. The difference may be due to difference in COVID-19 related information access, risk  
16  
17 8 perception, and enforcement of COVID related measures in nations. In addition, college student  
18  
19 9 in Amhara region, medical students in Egypt, Iran, Libya, Jordan, and University students in  
20  
21 10 Birzeit (Palestine) [23, 31, 33, 35-37] implemented proper strategies to prevent its spread of the  
22  
23 11 disease. This may be due too high-risk perception, advanced knowledge about the disease, and  
24  
25 12 previous experience of infection prevention practice enabled them to properly implement COVID-  
26  
27 13 19 preventive health behavior. School authorities with respected responsible health authorities  
28  
29 14 need to identify, meet, and coordinate the implementation of preventive behaviors at schools. The  
30  
31 15 promotion and awareness creation activities also need to be revised according to the situation  
32  
33 16 evolution.

34  
35 17 The analysis of predictors of knowledge about COVID-19 revealed that engaged/married and  
36  
37 18 students living alone had lower level of knowledge. Similarly, study done among college student  
38  
39 19 in Amhara region reported single students had good knowledge about COVID-19 [31]. The other  
40  
41 20 study health science student in Arbaminch reported that married and student living with family  
42  
43 21 members had good knowledge than their counterparts [30]. Whereas, On the other hand, being  
44  
45 22 affiliated with other religions, having educated father, and using television, radio, and health  
46  
47 23 professional as a source of information were positively associated with good knowledge. Health  
48  
49 24 professionals and electronic medias were the reliable source of information and promote health  
50  
51 25 awareness and engagement in preventive measures. Study done in Debre Berhan University  
52  
53 26 reported that source of information about COVID-19 associated with the mean knowledge [32].  
54  
55 27 Elsewhere study done in Ghana reported that increased access of information from electronic  
56  
57 28 media and the role of peers and family members in dissemination of COVID-19 related  
58  
59 29 information [21].

1  
2  
3 1 The analysis on the predictor of preventive health behavior among the student showed that being  
4 2 female and health professionals' source of information increased the engagement in preventive  
5 3 behaviors. Although those who had increased exposure to electronic medias seemed to be more  
6 4 aware of preventive measures to avoid COVID-19 spread, there is still the possibility that  
7 5 misinformation on the internet can have produced the opposite. We found that females engaged  
8 6 more in preventive health behaviors than males. This is allied with a tendency of females to be  
9 7 more health-conscious and engaged in preventive behavior [38]. Moreover, the low preventive  
10 8 behavior in men may be due to their perceptions of masculinity which reduces their motivation to  
11 9 accept preventive health behavior [24, 39]. Similar findings were reported by studies done in  
12 10 Portugal, medical students in Egypt, university students in Palestine, and China [22, 33, 37, 40].  
13 11 Health messages and other health promotion initiatives at schools need to introduce gender-  
14 12 specific tailor preventive measures in order to enhance their efficiency. On the other hand, student  
15 13 whose father employed in non-governmental organization and other jobs had decreased  
16 14 engagement in preventive health behaviors. In this study the level of knowledge of the participant  
17 15 was not significant predictor for preventive health behavior. This may be due to knowledge is  
18 16 neither sufficient nor necessary to trigger a behavioral change (adopting preventive behaviors).

19 17 This study has certain limitations to be noted. This is cross sectional study, could not show a cause-  
20 18 and-effect relationship, and the findings represent the situation during the study period. The  
21 19 knowledge and preventive practices among the student may change rapidly. Besides, this study  
22 20 was based on self-report of the participant. There would be recall and social desirability that can  
23 21 bias the findings.

## 22 CONCLUSIONS

23 23 In this study, substantial number of the students had inadequate knowledge about COVID-19 and  
24 24 poorly engaged in COVID-19 preventive health behavior. The research results indicated that  
25 25 engaged/married and students living alone had a lower level of knowledge. Being affiliated with  
26 26 other religions, having educated father, and using television, radio, and health professional as a  
27 27 source of information were all been associated with good knowledge. Sex, father occupation and  
28 28 source of information have all contributed to COVID-19 preventive behaviors. Therefore, the  
29 29 effectiveness of COVID-19 prevention measures needs to be well established among the students.  
30 30 Interventions that increase the awareness of the students and promote health behaviors need to be

1  
2  
3 1 strengthen in secondary schools. It is suggested to introduce COVID-19 related message need to  
4 be disseminated in related academic sessions, using school clubs, and mini-medias. In addition,  
5 2 the main sources of COVID-19 related information (health professionals, television, and radio)  
6 3 need to strengthen the dissemination of tailored, credible, and timely message to enhance the  
7 4 knowledge and engagement the student in preventive health behaviors.  
8 5  
9 6

## 6 **Acknowledgements**

7 The authors would like to thank the study participant and data collectors for their cooperation.

## 8 **Contributors**

9 SH AA AK and KS conceived and designed the study. SH AA AK and KS participated in data  
10 processing and management. SH analyzed the data and drafted the manuscript. AK and KS  
11 participated in data analysis and interpretation. SH AA AK and KS reviewed the drafted  
12 manuscript. All authors read and approved the final manuscript.

## 13 **Funding**

14 The author received no specific funding for this work

## 15 **Competing interests**

16 The author declare that he has no conflict of interest

## 17 **Consent for publication**

18 Not applicable

## 19 **Data availability statement**

20 Data will be available from the corresponding author upon reasonable request.

## 21 **Ethics Statement**

22 Ethical clearance was obtained from the Institutional Review Board of the University of Gondar  
23 with a reference number of V/P/RCS/05/588/2020. Letter of permission was obtained from Gondar  
24 city administrative education office. After the purpose and objective of the study have been  
25 informed, written consent was obtained from each study participant. Any identifiers of the study  
26 participants were not recorded. Indeed, for the participants with age less than 18, family/guardian

1 informed consent and an assent from themselves was taken. Finally, health information was  
2 provided for the study participants about the coronavirus and relative preventive measures.

### 3 **References**

- 4 1. Zu ZY, Jiang MD, Xu PP, Chen W, Ni QQ, Lu GM, Zhang LJ. Coronavirus disease 2019  
5 (COVID-19): a perspective from China. *Radiology*. 2020 Aug;296(2): E15-25.
- 6 2. World health organization: Listings of WHO's response to COVID-19  
7 <https://www.who.int/news/item/29-06-2020-covid-timeline>. Accessed 28 January 2021.
- 8 3. Worldometers. Covid-19 coronavirus pandemic; 2020. Available from:  
9 <https://www.worldometers.info/coronavirus/>. Accessed 28 January 2021.
- 10 4. COVID-19: One year later – WHO Director-General's new year message  
11 [https://www.who.int/news/item/30-12-2020-covid-19-anniversary-and-looking-forward-](https://www.who.int/news/item/30-12-2020-covid-19-anniversary-and-looking-forward-to-2021)  
12 [to-2021](https://www.who.int/news/item/30-12-2020-covid-19-anniversary-and-looking-forward-to-2021). Accessed 28 January 2021.
- 13 5. Zikargae MH. COVID-19 in Ethiopia: Assessment of How the Ethiopian Government has  
14 Executed Administrative Actions and Managed Risk Communications and Community  
15 Engagement. *Risk management and healthcare policy*. 2020; 13:2803.
- 16 6. Ministry of Health and Ethiopian Public Health Institute. Ethiopia Confirmed the First Case  
17 of Covid-19 [https://www.ephi.gov.et/images/pictures/pic\\_2011/pic\\_2012/First-English-](https://www.ephi.gov.et/images/pictures/pic_2011/pic_2012/First-English-Press-release-1.pdf)  
18 [Press-release-1.pdf](https://www.ephi.gov.et/images/pictures/pic_2011/pic_2012/First-English-Press-release-1.pdf)
- 19 7. Ministry of Education. Concept Note for Education Sector COVID 19-Preparedness and  
20 Response Plan. Addis Ababa, Ethiopia: 3<sup>rd</sup> April 2020.
- 21 8. Baye K. COVID-19 prevention measures in Ethiopia: Current realities and prospects. *Intl*  
22 *Food Policy Res Inst*; 2020 May 12.
- 23 9. WHO Health Emergency Dashboard; Ethiopia. Available at:  
24 <https://covid19.who.int/region/afro/country/et>. Accessed 28, January 2021.
- 25 10. UNICEF Ethiopia. The case for safely reopening schools in Ethiopia. Available at:  
26 <https://www.unicef.org/ethiopia/stories/case-safely-reopening-schools-ethiopia>. Accessed  
27 28, January 2021.
- 28 11. Erfani A, Shahriarirad R, Ranjbar K, Mirahmadizadeh A, Moghadami M. Knowledge,  
29 attitude and practice toward the novel coronavirus (COVID-19) outbreak: a population-  
30 based survey in Iran. *Bull World Health Organ*. 2020 Mar 30;30(10.2471).

12. Geda NR, Legesse B, Kebede SW, Fikadu B. Perceptions of Risks and Impacts of COVID-19 Among the Public in Ethiopia. *Frontier: Insights*; 2020.
13. World Health Organization. *Managing epidemics: key facts about major deadly diseases*. World Health Organization; 2018. <https://apps.who.int/iris/handle/10665/272442>.
14. World Health Organization. *RCCE ACTION PLAN GUIDANCE: COVID-19 preparedness & response*. <https://www.who.int/docs/default-source/coronaviruse/covid19-rcce-guidance-final-brand.pdf>.
15. Zegarra-Valdivia J, Vilca BN, Guerrero RJ. Knowledge, perception and attitudes in Regard to COVID-19 Pandemic in Peruvian Population, 2020.
16. Teferi SC. A Review on Knowledge, Attitude, and Practice during the COVID-19 Pandemic in Ethiopia. *Int J Virol Infect Dis*. 2020;5(2): 040-044.
17. Kebede Y, Yitayih Y, Birhanu Z, Mekonen S, Ambelu A. Knowledge, perceptions and preventive practices towards COVID-19 early in the outbreak among Jimma university medical center visitors, Southwest Ethiopia. *PloS one*. 2020 May 21;15(5):e0233744.
18. Tesfaye ZT, Yismaw MB, Negash Z, Ayele AG. COVID-19-related knowledge, attitude and practice among hospital and community pharmacists in Addis Ababa, Ethiopia. *Integrated Pharmacy Research & Practice*. 2020; 9:105.
19. Girma S, Agenagnew L, Beressa G, Tesfaye Y, Alenko A. Risk perception and precautionary health behavior toward COVID-19 among health professionals working in selected public university hospitals in Ethiopia. *Plos one*. 2020 Oct 29;15(10):e0241101.
20. Ayed MM, Mahmoud TM, Kamal FE. Impact of Teaching Program Regarding COVID-19 on Knowledge, Attitudes, Practices among Student.
21. IBk L, Apanga PA, Kumbeni MT, Akunvane R, Akparibo R. Knowledge and perceptions on COVID-19 among Senior High School students in Ghana: a cross-sectional study.
22. Alves RF, Samorinha C, Precioso J. Knowledge, attitudes and preventive behaviors toward COVID-19: a study among higher education students in Portugal. *Journal of Health Research*. 2020 Nov 11.
23. Souli D, Dilucca M. Knowledge, attitude and practice of secondary school students toward COVID-19 epidemic in Italy: a cross selectional study. *bioRxiv*. 2020 Jan 1.



- 1 24. Ministry of Health and Ethiopian Public Health Institute. Risk Communication and  
2 Community Engagement Strategy for COVID-19 Outbreak Response in Ethiopia. RCCE.  
3 Addis Ababa, Ethiopia: MoH & EPHI; 2020.
- 4 25. UNICEF. Creating awareness about COVID-19 in Ethiopia. Available at:  
5 [https://www.unicef.org/ethiopia/media/2716/file/COVID%2019%20Response%20update](https://www.unicef.org/ethiopia/media/2716/file/COVID%2019%20Response%20update%20#1.pdf)  
6 [%20#1.pdf](https://www.unicef.org/ethiopia/media/2716/file/COVID%2019%20Response%20update%20#1.pdf).
- 7 26. UNICEF Ethiopia. Available at: [https://www.unicef.org/ethiopia/stories/youth-volunteers-](https://www.unicef.org/ethiopia/stories/youth-volunteers-take-streets-mobilize-against-covid-19-ethiopia-0)  
8 [take-streets-mobilize-against-covid-19-ethiopia-0](https://www.unicef.org/ethiopia/stories/youth-volunteers-take-streets-mobilize-against-covid-19-ethiopia-0). Accessed 28, January 2021.
- 9 27. World Health Organization: Ethiopia. News and Press Release. 31 December 2020.  
10 Available at: <https://www.who.int/emergencies/diseases/novel-coronavirus-2019/advice>.  
11 Accessed 28, January 2021.
- 12 28. Gorndar City administration Educational Affairs, Preparatory School students list by sex  
13 and school type, 2019/2020.
- 14 29. Bloom BS. (1956) Taxonomy education. New York: David McKay.
- 15 30. Wogayehu B, Taye W, Faraja K. Knowledge regarding 2019 novel coronavirus (2019-  
16 nCoV) infection among final year health science students at Arbaminch College of Health  
17 Sciences, Southern Ethiopia: a cross-sectional study.
- 18 31. Tadesse AW, Melese N, Eshetie S, Chane M, Ali A. Knowledge, Attitude, and Practice  
19 and Associated Factors towards COVID-19 among College Students in Amhara Region,  
20 Ethiopia; A Cross-Sectional Study.
- 21 32. Aynalem YA, Akalu TY, Gebresellassie B, Sharew NT, Shiferaw WS. Assessment of  
22 undergraduate student knowledge, practices, and attitude towards COVID-19 in Debre  
23 Berhan University, Ethiopia.
- 24 33. Soltan EM, El-Zoghby SM, Salama HM. Knowledge, Risk Perception, and Preventive  
25 Behaviors Related to COVID-19 Pandemic Among Undergraduate Medical Students in  
26 Egypt. SN comprehensive clinical medicine. 2020 Dec;2(12):2568-75.
- 27 34. Taghrir MH, Borazjani R, Shiraly R. COVID-19 and Iranian medical students; a survey on  
28 their related-knowledge, preventive behaviors and risk perception. Archives of Iranian  
29 medicine. 2020 Apr 1;23(4):249-54.
- 30 35. Elhadi M, Msherghi A, Alsoufi A, Buzreg A, Bouhuwaish A, Khaled A, Alhadi A,  
31 Alameen H, Biala M, Elgherwi A, Elkhafeefi F. Knowledge, preventive behavior and risk

- 1 perception regarding COVID-19: a self-reported study on college students. The Pan  
2 African Medical Journal. 2020 Jun 11;35(75).
- 3 36. Khasawneh AI, Humeidan AA, Alsulaiman JW, Bloukh S, Ramadan M, Al-Shatanawi TN,  
4 Awad HH, Hijazi WY, Al-Kammash KR, Obeidat N, Saleh T. Medical students and  
5 COVID-19: Knowledge, attitudes, and precautionary measures. A descriptive study from  
6 Jordan. *Frontiers in public health*. 2020;8.
- 7 37. Naseef HA, Hadba LS, Humos LA, Shaheen RN, Mitwasi TT, El-Khairi L. Knowledge,  
8 attitudes and practices about Coronavirus disease (COVID-19) among Birzeit University  
9 students: A cross-sectional study.
- 10 38. Hiller J, Schatz K, Drexler H. Gender influence on health and risk behavior in primary  
11 prevention: a systematic review. *Journal of Public Health*. 2017 Aug 1;25(4):339-49.
- 12 39. Vaidya V, Partha G, Karmakar M. Gender differences in utilization of preventive care  
13 services in the United States. *Journal of women's health*. 2012 Feb 1;21(2):140-5.
- 14 40. Peng Y, Pei C, Zheng Y, Wang J, Zhang K, Zheng Z, Zhu P. Knowledge, attitude and  
15 practice associated with COVID-19 among university students: a cross-sectional survey in  
16 China.

1 **Tables**

2 **Table 1:** Socio-demographic characteristics of secondary school students in Gondar City,  
 3 Northwest Ethiopia, 2021 (n=370).

| Variables            | Description              | Knowledge about COVID-19 |                |            | p-value |
|----------------------|--------------------------|--------------------------|----------------|------------|---------|
|                      |                          | Poor n (%)               | Moderate n (%) | Good n (%) |         |
| Age                  | 15-19                    | 150 (84.7)               | 95 (89.6)      | 77 (88.5)  | 0.446   |
|                      | 20-30                    | 27 (15.3)                | 11 (10.4)      | 10 (11.5)  |         |
| Sex                  | Male                     | 86 (49.2)                | 51 (47.2)      | 41 (47.1)  | 0.0499  |
|                      | Female                   | 90 (50.8)                | 56 (52.8)      | 46 (52.9)  |         |
| Marital status       | Single                   | 142 (80.2)               | 96 (90.6)      | 75 (86.2)  | 0.059   |
|                      | Engaged/married          | 35 (19.8)                | 10 (9.4)       | 12 (13.8)  |         |
| Grade                | 10th                     | 80 (45.2)                | 39 (36.8)      | 38 (43.7)  | 0.495   |
|                      | 11th                     | 39 (22.0)                | 33 (31.1)      | 21 (24.1)  |         |
|                      | 12th                     | 58 (32.8)                | 34 (32.1)      | 28 (32.2)  |         |
| Religion             | Orthodox                 | 161 (90.9)               | 91 (85.8)      | 72 (82.8)  | 0.344   |
|                      | Muslim                   | 14 (7.9)                 | 13 (12.3)      | 12 (13.8)  |         |
|                      | Others                   | 2 (1.2)                  | 2 (1.9)        | 3 (3.4)    |         |
| Mother's occupation  | Housewife                | 126 (71.2)               | 75 (70.8)      | 61 (70.1)  | 0.986   |
|                      | Government employee      | 20 (11.3)                | 15 (14.2)      | 12 (13.8)  |         |
|                      | Marchant                 | 17 (9.6)                 | 9 (8.5)        | 7 (8.1)    |         |
|                      | NGO employee             | 5 (2.8)                  | 4 (3.8)        | 4 (4.6)    |         |
|                      | Farmer                   | 4 (2.3)                  | 1 (0.9)        | 2 (2.3)    |         |
|                      | Other                    | 5 (2.8)                  | 2 (1.9)        | 1 (1.2)    |         |
| Father's occupation  | Government Employee      | 34 (19.2)                | 28 (26.4)      | 30 (34.5)  | 0.039   |
|                      | NGO employee             | 17 (9.6)                 | 11 (10.4)      | 14 (16.1)  |         |
|                      | Merchant                 | 43 (24.3)                | 29 (27.4)      | 21 (24.1)  |         |
|                      | Farmer                   | 72 (40.7)                | 31 (29.3)      | 18 (20.7)  |         |
|                      | other                    | 11 (6.2)                 | 7 (6.6)        | 4 (4.6)    |         |
| Mother's educational | Unable to read and write | 71 (40.1)                | 32 (30.2)      | 28 (32.2)  | 0.151   |
|                      | Able to read and write   | 41 (23.2)                | 32 (30.2)      | 16 (18.4)  |         |

|                             |                          |            |           |           |       |
|-----------------------------|--------------------------|------------|-----------|-----------|-------|
| status                      | Primary education        | 31 (17.5)  | 12 (11.3) | 16 (18.4) |       |
|                             | Secondary education      | 24 (13.6)  | 18 (17.0) | 17 (19.5) |       |
|                             | Diploma and above        | 10 (5.7)   | 12 (11.3) | 10 (11.5) |       |
| Father's educational status | Unable to read and write | 39 (22.0)  | 10 (9.4)  | 15 (17.2) | 0.001 |
|                             | Able to read and write   | 59 (33.3)  | 37 (34.9) | 20 (23.0) |       |
|                             | Primary education        | 27 (15.2)  | 20 (18.9) | 12 (13.8) |       |
|                             | Secondary education      | 34 (19.2)  | 23 (21.7) | 13 (14.9) |       |
|                             | Diploma and above        | 18 (10.2)  | 16 (15.1) | 27 (31.0) |       |
| Living arrangement          | With mother/father       | 103 (58.2) | 70 (66.0) | 64 (73.6) | 0.057 |
|                             | With siblings            | 25 (14.1)  | 13 (12.3) | 11 (12.6) |       |
|                             | With relatives           | 14 (7.9)   | 12 (11.3) | 5 (5.8)   |       |
|                             | Alone                    | 31 (17.5)  | 8 (7.6)   | 4 (4.6)   |       |
|                             | Other                    | 4 (2.3)    | 3 (2.8)   | 3 (3.5)   |       |

1  
2  
3  
4  
5  
6  
7  
8  
9  
10  
11  
12  
13  
14  
15  
16  
17  
18  
19  
20  
21  
22  
23  
24  
25  
26  
27  
28  
29  
30  
31  
32  
33  
34  
35  
36  
37  
38  
39  
40  
41  
42  
43  
44  
45  
46  
47  
48  
49  
50  
51  
52  
53  
54  
55  
56  
57  
58  
59  
60

**Table 2:** Knowledge about COVID-19 among secondary school students in Gondar City, Northwest Ethiopia, 2021 (N= 370).

| S.no | Knowledge Items                                                                                                                                                            | Frequency (%) |            |
|------|----------------------------------------------------------------------------------------------------------------------------------------------------------------------------|---------------|------------|
|      |                                                                                                                                                                            | Wrong         | Correct    |
| K1   | Main clinical symptoms of COVID-19 are fever, cough, shortness of breath, and fatigue                                                                                      | 45 (12.2)     | 325 (87.8) |
| K2   | Unlike the common cold, stuffy nose, runny nose, and sneezing are less common in persons infected with the COVID-19 virus                                                  | 221(59.7)     | 149 (40.3) |
| K3   | COVID-19 symptoms appear within 2–14 days                                                                                                                                  | 120 (32.4)    | 250 (67.6) |
| K4   | Currently, there is no effective treatment or vaccine for COVID-2019, but early symptomatic and supportive treatment can help most patients to recover from the infection. | 160 (43.2)    | 210 (56.8) |
| K5   | Not all persons with COVID-19 will develop severe cases. Those who are elderly, have chronic illnesses, and with suppressed immunity are more likely to be severe cases    | 184 (49.7)    | 186 (50.3) |
| K6   | The corona virus can infect children and adolescents.                                                                                                                      | 136 (36.8)    | 234 (63.2) |
| K7   | Touching or shaking hands of an infected person would result in the infection by the COVID-19 virus.                                                                       | 108 (29.2)    | 262 (70.8) |
| K8   | Touching an object or surface with the virus on it, then touching your mouth, nose, or eyes with the unwashed hand would result in the infection by the COVID-19 virus     | 63 (17.0)     | 307 (83.0) |
| K9   | The COVID-19 virus spreads via respiratory droplets of infected individuals through the air during sneezing or coughing of infected patients.                              | 75 (20.3)     | 295 (79.7) |
| K10  | Persons with COVID-19 cannot infect the virus to others if he has no any symptom of COVID-19                                                                               | 97 (26.2)     | 273 (73.8) |
| K11  | Wearing masks when moving out of home is important to prevent the infection with COVID-19 virus                                                                            | 126 (34.1)    | 244 (65.9) |
| K12  | Children and young adults do not need to take measures to prevent the infection by the COVID-19 virus                                                                      | 101 (27.3)    | 269 (72.7) |
| K13  | To prevent the COVID-19 infection, individuals should avoid going to crowded places such as public transportations, religious places, Hospitals and Workplaces             | 100 (27.0)    | 270 (73.0) |
| K14  | Washing hands frequently with soap and water for at least 20 seconds or use an alcohol-based hand sanitizer (60%) is important to prevent infection with COVID-19          | 123 (33.2)    | 247(66.8)  |
| K15  | Traveling to an infectious area or having contact with someone traveled to an area where the infection present is a risk for developing an infection                       | 98 (26.5)     | 272 (73.5) |

|     |                                                                                                                                 |           |            |
|-----|---------------------------------------------------------------------------------------------------------------------------------|-----------|------------|
| K16 | Isolation and treatment of people who are infected with the COVID-19 virus are effective ways to reduce the spread of the virus | 78 (21.1) | 292 (78.9) |
| K17 | People who have contact with someone infected with the COVID-19 virus should be immediately isolated in a proper place.         | 85 (23.0) | 285 (77.0) |

For peer review only

**Table 3:** COVID-19 preventive behaviors among secondary school students in Gondar city, Northwest Ethiopia, 2021 (n =370)

| S. No | Items                                                                                            | Mean | Standard deviation |
|-------|--------------------------------------------------------------------------------------------------|------|--------------------|
| PH1   | I keep a distance of at least two meters from others.                                            | 2.66 | 1.28               |
| PH2   | I place a tissue paper or bending elbow in front of my mouth and nose when coughing or sneezing. | 3.26 | 1.33               |
| PH3   | I don't shake hands with others and don't kiss them.                                             | 2.92 | 1.30               |
| PH4   | I don't leave the house unless absolutely necessary                                              | 2.66 | 1.32               |
| PH5   | I wash my hands regularly with soap and water for at least 20 seconds every hour.                | 2.85 | 1.28               |
| PH6   | I do not touch my eyes, nose and mouth by hands.                                                 | 2.76 | 1.32               |
| PH7   | I wash my hands with soap and water before touching anything while entering home.                | 2.98 | 1.44               |
| PH8   | I wear facemask consistently whenever I go out to my home.                                       | 2.69 | 1.39               |
|       | Overall preventive behavior standard score                                                       | 2.85 | 0.77               |

**Table 4:** Predictors of knowledge about COVID-19 among secondary school students in Gondar City, North West Ethiopia, 2021 (n=370)

| Variable                                    | Regression coefficient                        | Standard error | p-value | Adjusted Odds ratio | 95% CI for AOR |             |
|---------------------------------------------|-----------------------------------------------|----------------|---------|---------------------|----------------|-------------|
| <b>Age</b>                                  | 15-19 (ref.)                                  |                |         |                     |                |             |
|                                             | 20-30                                         | 0.19           | .34     | 0.58                | 1.21           | 0.62, 2.37  |
| <b>Marital status</b>                       | Single (ref.)                                 |                |         |                     |                |             |
|                                             | Engaged/married                               | -0.75          | 0.33    | 0.02                | 0.47           | 0.25, 0.90  |
| <b>Religion</b>                             | Orthodox (ref.)                               |                |         |                     |                |             |
|                                             | Muslim                                        | 0.40           | 0.35    | 0.25                | 1.46           | 0.74, 2.89  |
|                                             | Other*                                        | 2.04           | 0.84    | 0.01                | 7.71           | 1.50, 39.66 |
| <b>Father's educational status</b>          | Unable to read and write (ref.)               |                |         |                     |                |             |
|                                             | Able to read and write                        | 0.28           | 0.33    | 0.39                | 1.33           | 0.69, 2.55  |
|                                             | Completed primary school                      | 0.22           | 0.39    | 0.57                | 1.24           | 0.58, 2.66  |
|                                             | Completed secondary school                    | 0.06           | 0.39    | 0.89                | 1.06           | 0.49, 2.30  |
| <b>Father's occupation</b>                  | Diploma and higher Government Employee (ref.) | 0.94           | 0.44    | 0.03                | 2.56           | 1.07, 6.12  |
|                                             | NGO employee                                  | 0.29           | 0.38    | 0.44                | 1.34           | 0.64, 2.80  |
|                                             | Merchant                                      | -0.44          | 0.33    | 0.18                | 0.64           | 0.34, 1.23  |
|                                             | Farmer                                        | -0.41          | 0.37    | 0.27                | 0.67           | 0.32, 1.38  |
|                                             | Other                                         | -0.75          | 0.48    | 0.12                | 0.47           | 0.18, 1.20  |
| <b>Living arrangement</b>                   | Parents (ref.)                                |                |         |                     |                |             |
|                                             | Siblings                                      | -0.26          | 0.33    | 0.44                | 0.77           | 0.41, 1.47  |
|                                             | Relatives                                     | -0.30          | 0.38    | 0.44                | 0.74           | 0.35, 1.57  |
|                                             | Alone                                         | -1.14          | 0.40    | 0.00                | 0.32           | 0.15, 0.69  |
| <b>Source of information about COVID-19</b> | Others                                        | -0.27          | 0.66    | 0.69                | 0.77           | 0.21, 2.77  |
|                                             | Facebook (ref.)                               |                |         |                     |                |             |
|                                             | Telegram                                      | 0.81           | 0.59    | 0.17                | 2.24           | 0.70, 7.13  |
|                                             | Television                                    | 1.89           | 0.46    | 0.00                | 6.68           | 2.73, 16.36 |
|                                             | Radio                                         | 1.07           | 0.52    | 0.04                | 2.91           | 1.04, 8.11  |
| <b>Cut 1</b>                                | Health professionals                          | 1.42           | 0.52    | 0.01                | 4.15           | 1.51, 11.40 |
|                                             |                                               | 1.21           | 0.60    |                     |                | 0.04, 2.38  |
| <b>Cut 2</b>                                |                                               | 2.67           | 0.61    |                     |                | 1.48, 3.86  |

\*Other: Catholic and Protestant



**Table 5:** Predictors of COVID-19 preventive health behaviors among secondary school students in Gondar City, North West Ethiopia, 2021 (n=370)

| Variable                                    | Unstandardize<br>d B            | Standardize<br>d $\beta$ | 95% CI for B |
|---------------------------------------------|---------------------------------|--------------------------|--------------|
| <b>Sex</b>                                  | Male (ref.)                     |                          |              |
|                                             | Female                          | 1.35*                    | 0.11         |
| <b>Age</b>                                  | 15-19 (ref.)                    |                          |              |
|                                             | 20-30                           | 0.73                     | 0.04         |
| <b>Marital status</b>                       | Single (ref.)                   |                          |              |
|                                             | Engaged/married                 | 1.64                     | 0.10         |
| <b>Grade</b>                                | 10 <sup>th</sup> (ref.)         |                          |              |
|                                             | 11 <sup>th</sup>                | -0.61                    | -0.04        |
|                                             | 12 <sup>th</sup>                | 0.17                     | 0.01         |
| <b>Mother's educational status</b>          | Unable to read and write (ref.) |                          |              |
|                                             | Able to read and write          | -1.16                    | -0.08        |
|                                             | Completed primary school        | -0.98                    | -0.06        |
|                                             | Completed secondary school      | -1.33                    | -0.08        |
|                                             | Diploma and higher              | -1.82                    | -0.08        |
| <b>Father's educational status</b>          | Unable to read and write (ref.) |                          |              |
|                                             | Able to read and write          | 0.18                     | 0.01         |
|                                             | Completed primary school        | 0.46                     | 0.03         |
|                                             | Completed secondary school      | -0.90                    | -0.06        |
|                                             | Diploma and higher              | -1.20                    | -0.07        |
| <b>Mother's occupation</b>                  | Housewife (ref.)                |                          |              |
|                                             | Government employee             | -0.72                    | -0.04        |
|                                             | Merchant                        | -1.17                    | -0.05        |
|                                             | NGO employee                    | 2.14                     | 0.06         |
|                                             | Farmer                          | 0.52                     | 0.01         |
|                                             | Other                           | 1.07                     | 0.03         |
| <b>Father's occupation</b>                  | Government Employee (ref.)      |                          |              |
|                                             | NGO employee                    | -2.37*                   | -0.12        |
|                                             | Merchant                        | -0.25                    | -0.02        |
|                                             | Farmer                          | -0.59                    | -0.04        |
|                                             | Other                           | -3.46*                   | -0.13        |
| <b>Living arrangement</b>                   | Parents (ref.)                  |                          |              |
|                                             | Siblings                        | 0.60                     | 0.03         |
|                                             | Relatives                       | -0.53                    | -0.02        |
|                                             | Alone                           | 0.02                     | 0.01         |
|                                             | Others                          | 2.42                     | 0.06         |
| <b>Source of information about COVID-19</b> | Facebook (ref.)                 |                          |              |
|                                             | Telegram                        | -0.41                    | -0.02        |
|                                             | Television                      | 0.92                     | 0.07         |
|                                             | Radio                           | -0.12                    | -0.01        |
|                                             | Health professionals            | 3.00*                    | 0.17         |

|                       |            |       |      |              |
|-----------------------|------------|-------|------|--------------|
| <b>Social support</b> | 10.32±2.30 | 0.29  | 0.11 | -0.01, 0.58  |
| <b>Constant</b>       |            | 19.84 |      | 15.16, 24.53 |

\*p<0.05, ref. =reference

For peer review only

1  
2  
3  
4  
5  
6  
7  
8  
9  
10  
11  
12  
13  
14  
15  
16  
17  
18  
19  
20  
21  
22  
23  
24  
25  
26  
27  
28  
29  
30  
31  
32  
33  
34  
35  
36  
37  
38  
39  
40  
41  
42  
43  
44  
45  
46  
47  
48  
49  
50  
51  
52  
53  
54  
55  
56  
57  
58  
59  
60

1 **Figure's legends**

2 **Figure 1:** Source of information about COVID-19 among secondary school students in Gondar  
3 City, Northwest Ethiopia, 2021 (N=370).

4 **Figure 2:** Knowledge status about COVID-19 among secondary school students in Gondar City,  
5 Northwest Ethiopia, 2021 (N= 370).

For peer review only

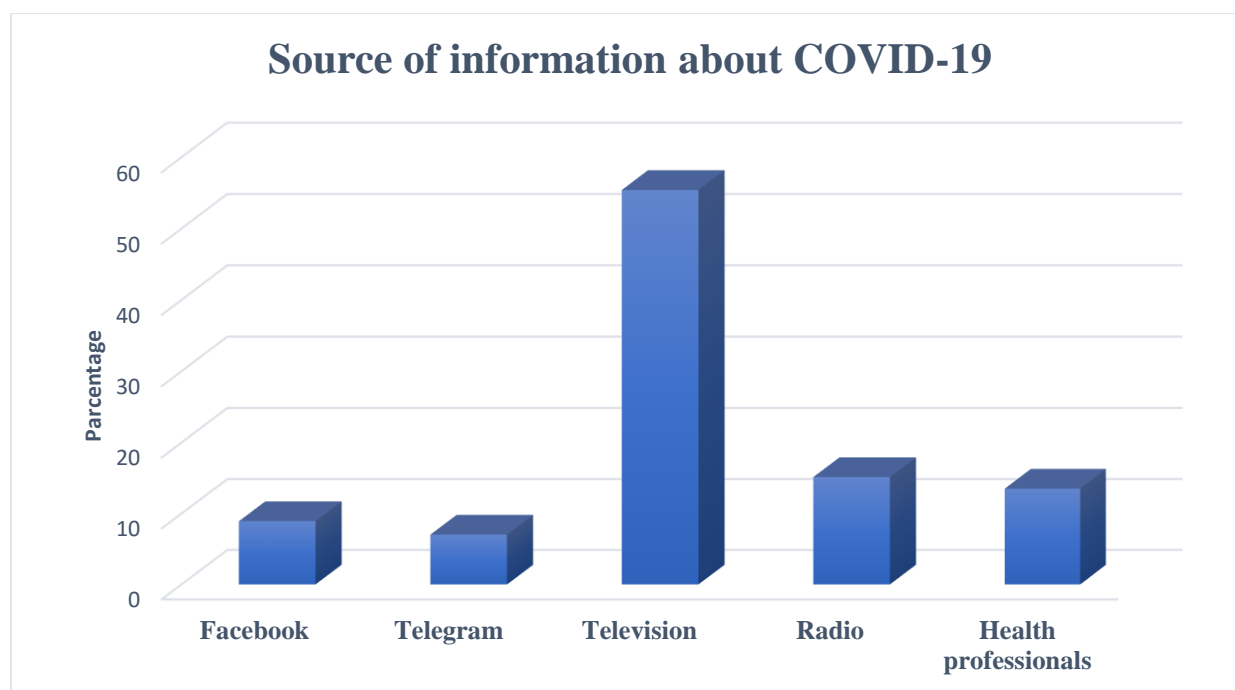

29 **Figure 1:** Source of information about COVID-19 among secondary school students in Gondar  
30 City, Northwest Ethiopia, 2021 (N=370).  
31  
32  
33  
34  
35  
36  
37  
38  
39  
40  
41  
42  
43  
44  
45  
46  
47  
48  
49  
50  
51  
52  
53  
54  
55  
56  
57  
58  
59  
60

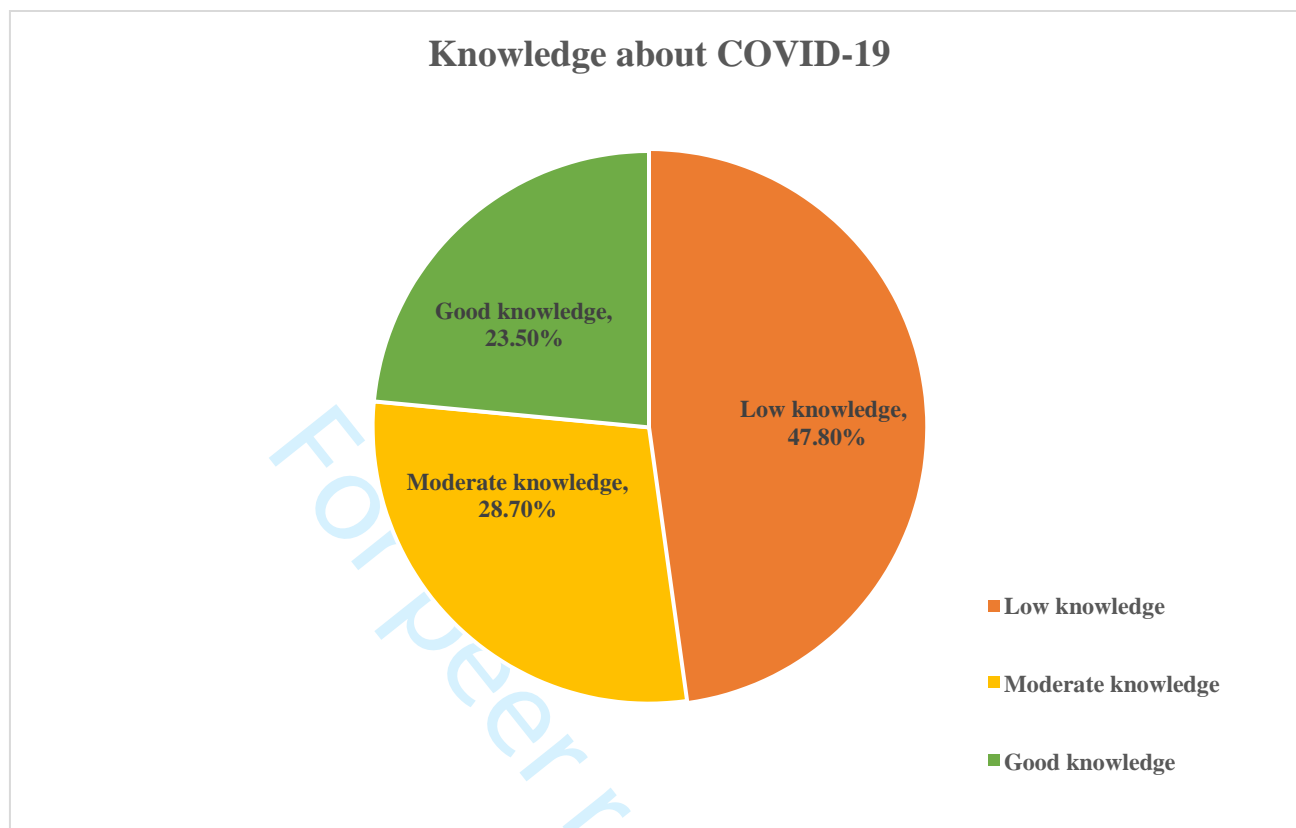

32 **Figure 2:** Knowledge status about COVID-19 among secondary school students in Gondar City,  
33 Northwest Ethiopia, 2021 (N= 370).  
34

## English Version Questionnaire

**Title of the Research:** COVID-19 related knowledge and preventive behaviors among students in re-opened secondary schools in Gondar City, Northwest Ethiopia: cross-sectional study

**Name of the Organization:** University of Gondar

### Introduction

This information sheet is prepared for secondary school students of Gondar town, North West, Ethiopia. The aim of the form is to make the above concerned students clear about the purpose of research, data collection procedures and get consent to conduct the research

### Purpose of the Research Project

The aim of this study is to assess knowledge and preventive health behaviors towards COVID-19 school students in Gondar city, Northwest Ethiopia 2020

### Procedure

You are randomly selected to be one of the study participants. If you are willing to participate in this study, you will be requested to sign the consent form after you clearly understand the aim of this study. Finally, you are kindly requested to give your genuine response in the questionnaire.

### Risk and /or Discomfort

By participating in this research project, there is no risk or discomfort otherwise you will take time about 30 minutes to fill the questionnaire.

### Benefits of being in the study

There may not be direct benefits to you following your participation on this study but your participation is likely to help us in preventive health behaviors and associated factors. Ultimately this will help us to provide information for planners to consume to design and implement interventions.

### Confidentiality and Privacy Protections:

You do not need to write your name to the questionnaire. All your responses and the results obtained will be kept confidentially by using coding system whereby no one will have access to your responses.

### **Incentives/Payments for Participating**

You will not be provided any incentives or payment to take part in this project.

### **Right to Refusal or Withdraw**

You have the full right to refuse from participating in this research if you feel discomfort with it.

You have also the full right to withdraw from this study at any time if you wish.

### **Contacts and Questions:**

If you have any questions about the study please ask now. If you have questions later, want additional information, or wish to withdraw call the researcher conducting the study.

## **Annex 2: English Version Consent form**

I have been informed that the purpose of this study is to assess preventive health behaviors and its predictors of oral hygiene behavior among secondary school students. I have understood that participation in this study is entirely voluntarily. I have been told that my answers to the questions will not be given to anyone else and no reports of this study ever identify me in any way. I have also been informed that my participation or non-participation or my refusal to answer questions will have no effect on me. I understood that participation in this study does not involve risks.

Your signature below indicates that you have read or has been read to you the information provided above and have decided to participate in the study. If you later decide that you wish to withdraw from the study, simply tell me, you may discontinue your participation at any time.

Signature of the participant: \_\_\_\_\_ Date\_\_\_\_\_

Data collector's Name: \_\_\_\_\_ Signature: \_\_\_\_\_ Date\_\_\_\_\_

Supervisor's Name: \_\_\_\_\_ Signature: \_\_\_\_\_ Date\_\_\_\_\_

**Part 1: Socio demographic characteristics of a patient**

| Code | Question            | Response                                                                                          |
|------|---------------------|---------------------------------------------------------------------------------------------------|
| 1.   | Age (in years)      | _____                                                                                             |
| 2.   | Sex                 | 1. male<br>2. female                                                                              |
| 3.   | Marital status      | 1. Single<br>2. Married<br>3. Divorced<br>4. Widowed                                              |
| 4.   | Religion            | 1. Orthodox<br>2. Muslim<br>3. protestant<br>4. other                                             |
| 5.   | Place of residence  | 1. Rural<br>2. Urban                                                                              |
| 6.   | Educational status  | 1. 10th<br>2. 11th<br>3. 12th                                                                     |
| 7.   | Mothers' occupation | 1. Government employee<br>2. NGO employee<br>3. Marchant<br>4. Farmer<br>5. If other specify_____ |
| 8.   | Fathers' occupation | 1. Government employee<br>2. NGO employee<br>3. Marchant<br>4. Farmer<br>5. If other specify_____ |



|                               |                                                                                                     |                                                                                                                                                                                                         |
|-------------------------------|-----------------------------------------------------------------------------------------------------|---------------------------------------------------------------------------------------------------------------------------------------------------------------------------------------------------------|
| 9.                            | Mothers' educational status                                                                         | <ol style="list-style-type: none"> <li>1. No formal education</li> <li>2. Grade 1-8</li> <li>3. Grade 9-12</li> <li>4. Diploma &amp; above</li> </ol>                                                   |
| 10.                           | Fathers' educational status                                                                         | <ol style="list-style-type: none"> <li>1. No formal education</li> <li>2. Grade 1-8</li> <li>3. Grade 9-12</li> <li>4. Diploma &amp; above</li> </ol>                                                   |
| 11.                           | Where do you usually get information about COVID-19? (Multiple selection is possible)               | <ol style="list-style-type: none"> <li>1. Facebook</li> <li>2. Telegram</li> <li>3. Television</li> <li>4. Radio</li> <li>5. Magazine</li> <li>6. Newspaper</li> <li>7. Other (specify)-----</li> </ol> |
| <b>Part 3: Social Support</b> |                                                                                                     |                                                                                                                                                                                                         |
| 12.                           | How many people are so close to you that you can count on them if you have great personal problems? | <ol style="list-style-type: none"> <li>1. None</li> <li>2. 1-2</li> <li>3. 3-5</li> <li>4. 5+</li> </ol>                                                                                                |
| 13.                           | How much interest and concern do people show in what you do?                                        | <ol style="list-style-type: none"> <li>1. None</li> <li>2. Little</li> <li>3. Uncertain</li> <li>4. Some</li> <li>5. A lot</li> </ol>                                                                   |
| 14.                           | How easy is it to get practical help from neighbors if you should need it?                          | <ol style="list-style-type: none"> <li>1. Very difficult</li> <li>2. Difficult</li> <li>3. Possible</li> <li>4. Easy</li> <li>5. Very easy</li> </ol>                                                   |

| <b>Preventive Health Behaviors to COVID-19</b> |                                                                                                  |                                                                          |  |
|------------------------------------------------|--------------------------------------------------------------------------------------------------|--------------------------------------------------------------------------|--|
| 15.                                            | I keep a distance of at least two meters from others.                                            | 1. Not at all<br>2. Rarely<br>3. Sometimes<br>4. Many times<br>5. Always |  |
| 16.                                            | I place a tissue paper or bending elbow in front of my mouth and nose when coughing or sneezing. | 1. Not at all<br>2. Rarely<br>3. Sometimes<br>4. Many times<br>5. Always |  |
| 17.                                            | I don't shake hands with others and don't kiss them.                                             | 1. Not at all<br>2. Rarely<br>3. Sometimes<br>4. Many times<br>5. Always |  |
| 18.                                            | I don't leave the house unless absolutely necessary                                              | 1. Not at all<br>2. Rarely<br>3. Sometimes<br>4. Many times<br>5. Always |  |
| 19.                                            | I wash my hands regularly with soap and water for at least 20 seconds every hour.                | 1. Not at all<br>2. Rarely<br>3. Sometimes<br>4. Many times<br>5. Always |  |
| 20.                                            | I do not touch my eyes, nose and mouth by hands.                                                 | 1. Not at all<br>2. Rarely<br>3. Sometimes                               |  |

|                                 |                                                                                                                                                                            |                                                                          |  |
|---------------------------------|----------------------------------------------------------------------------------------------------------------------------------------------------------------------------|--------------------------------------------------------------------------|--|
|                                 |                                                                                                                                                                            | 4. Many times<br>5. Always                                               |  |
| 21.                             | I wash my hands with soap and water without touching anything after entering home.                                                                                         | 1. Not at all<br>2. Rarely<br>3. Sometimes<br>4. Many times<br>5. Always |  |
| 22.                             | I wear facemask consistently whenever I go out to my home.                                                                                                                 | 1. Not at all<br>2. Rarely<br>3. Sometimes<br>4. Many times<br>5. Always |  |
| <b>Knowledge about COVID-19</b> |                                                                                                                                                                            |                                                                          |  |
| 23.                             | Main clinical symptoms of COVID-19 are fever, cough, shortness of breath, and fatigue                                                                                      | 1. True<br>2. False<br>3. I don't know                                   |  |
| 24.                             | Unlike the common cold, stuffy nose, runny nose, and sneezing are less common in persons infected with the COVID-19 virus                                                  | 1. True<br>2. False<br>3. I don't know                                   |  |
| 25.                             | COVID-19 symptoms appear within 2–14 days                                                                                                                                  | 1. True<br>2. False<br>3. I don't know                                   |  |
| 26.                             | Currently, there is no effective treatment or vaccine for COVID-2019, but early symptomatic and supportive treatment can help most patients to recover from the infection. | 1. True<br>2. False<br>3. I don't know                                   |  |
| 27.                             | Not all persons with COVID-19 will develop severe cases. Those who are elderly, have chronic                                                                               | 1. True<br>2. False<br>3. I don't know                                   |  |

|     |                                                                                                                                                                        |                                                                                                      |
|-----|------------------------------------------------------------------------------------------------------------------------------------------------------------------------|------------------------------------------------------------------------------------------------------|
|     | illnesses, and with suppressed immunity are more likely to be severe cases                                                                                             |                                                                                                      |
| 28. | Touching or shaking hands of an infected person would result in the infection by the COVID-19 virus.                                                                   | <ol style="list-style-type: none"> <li>1. True</li> <li>2. False</li> <li>3. I don't know</li> </ol> |
| 29. | Touching an object or surface with the virus on it, then touching your mouth, nose, or eyes with the unwashed hand would result in the infection by the COVID-19 virus | <ol style="list-style-type: none"> <li>1. True</li> <li>2. False</li> <li>3. I don't know</li> </ol> |
| 30. | The COVID-19 virus spreads via respiratory droplets of infected individuals through the air during sneezing or coughing of infected patients.                          | <ol style="list-style-type: none"> <li>1. True</li> <li>2. False</li> <li>3. I don't know</li> </ol> |
| 31. | Persons with COVID-19 cannot infect the virus to others if he has no any symptom of COVID-19                                                                           | <ol style="list-style-type: none"> <li>1. True</li> <li>2. False</li> <li>3. I don't know</li> </ol> |
| 32. | Wearing masks when moving out of home is important to prevent the infection with COVID-19 virus                                                                        | <ol style="list-style-type: none"> <li>1. True</li> <li>2. False</li> <li>3. I don't know</li> </ol> |
| 33. | Children and young adults do not need to take measures to prevent the infection by the COVID-19 virus                                                                  | <ol style="list-style-type: none"> <li>1. True</li> <li>2. False</li> <li>3. I don't know</li> </ol> |
| 34. | To prevent the COVID-19 infection, individuals should avoid going to crowded places such as public transportations, religious places, Hospitals and Workplaces         | <ol style="list-style-type: none"> <li>1. True</li> <li>2. False</li> <li>3. I don't know</li> </ol> |
| 35. | Washing hands frequently with soap and water for at least 20 seconds or use an alcohol-based hand                                                                      | <ol style="list-style-type: none"> <li>1. True</li> <li>2. False</li> <li>3. I don't know</li> </ol> |

|     |                                                                                                                                                      |                                                                                                  |
|-----|------------------------------------------------------------------------------------------------------------------------------------------------------|--------------------------------------------------------------------------------------------------|
|     | sanitizer (60%) is important to prevent infection with COVID-19                                                                                      |                                                                                                  |
| 36. | Traveling to an infectious area or having contact with someone traveled to an area where the infection present is a risk for developing an infection | <ol style="list-style-type: none"><li>1. True</li><li>2. False</li><li>3. I don't know</li></ol> |
| 37. | Isolation and treatment of people who are infected with the COVID-19 virus are effective ways to reduce the spread of the virus                      | <ol style="list-style-type: none"><li>1. True</li><li>2. False</li><li>3. I don't know</li></ol> |
| 38. | People who have contact with someone infected with the COVID-19 virus should be immediately isolated in a proper place.                              | <ol style="list-style-type: none"><li>1. True</li><li>2. False</li><li>3. I don't know</li></ol> |

## STROBE Statement—checklist of items that should be included in reports of observational studies

|                           | Item No. | Recommendation                                                                                                                                                                                    | Page No. |
|---------------------------|----------|---------------------------------------------------------------------------------------------------------------------------------------------------------------------------------------------------|----------|
| <b>Title and abstract</b> | 1        | (a) Indicate the study's design with a commonly used term in the title or the abstract                                                                                                            | 2        |
|                           |          | (b) Provide in the abstract an informative and balanced summary of what was done and what was found                                                                                               | 2        |
| <b>Introduction</b>       |          |                                                                                                                                                                                                   |          |
| Background/rationale      | 2        | Explain the scientific background and rationale for the investigation being reported                                                                                                              | 4, 5     |
| Objectives                | 3        | State specific objectives, including any pre-specified hypotheses                                                                                                                                 | 5        |
| <b>Methods</b>            |          |                                                                                                                                                                                                   |          |
| Study design              | 4        | Present key elements of study design early in the paper                                                                                                                                           | 6        |
| Setting                   | 5        | Describe the setting, locations, and relevant dates, including periods of recruitment, exposure, follow-up, and data collection                                                                   | 6        |
| Participants              | 6        | (a) Give the eligibility criteria, and the sources and methods of selection of participants                                                                                                       | 6        |
| Variables                 | 7        | Clearly define all outcomes, exposures, predictors, potential confounders, and effect modifiers. Give diagnostic criteria, if applicable                                                          | 6        |
| Data sources/measurement  | 8*       | For each variable of interest, give sources of data and details of methods of assessment (measurement). Describe comparability of assessment methods if there is more than one group              | 6, 7     |
| Bias                      | 9        | Describe any efforts to address potential sources of bias                                                                                                                                         | 7        |
| Study size                | 10       | Explain how the study size was arrived at                                                                                                                                                         | 6        |
| Quantitative variables    | 11       | Explain how quantitative variables were handled in the analyses. If applicable, describe which groupings were chosen and why                                                                      | 7        |
| Statistical methods       | 12       | (a) Describe all statistical methods, including those used to control for confounding                                                                                                             | 7        |
|                           |          | (b) Describe any methods used to examine subgroups and interactions                                                                                                                               | N/A      |
|                           |          | (c) Explain how missing data were addressed                                                                                                                                                       | N/A      |
|                           |          | (d) If applicable, describe analytical methods taking account of sampling strategy                                                                                                                | N/A      |
|                           |          | (e) Describe any sensitivity analyses                                                                                                                                                             | N/A      |
| <b>Results</b>            |          |                                                                                                                                                                                                   |          |
| Participants              | 13*      | (a) Report numbers of individuals at each stage of study—eg numbers potentially eligible, examined for eligibility, confirmed eligible, included in the study, completing follow-up, and analysed | 8        |
|                           |          | (b) Give reasons for non-participation at each stage                                                                                                                                              | 8        |
|                           |          | (c) Consider use of a flow diagram                                                                                                                                                                | N/A      |
| Descriptive data          | 14*      | (a) Give characteristics of study participants (eg demographic, clinical, social) and information on exposures and potential confounders                                                          | 8        |
|                           |          | (b) Indicate number of participants with missing data for each variable of interest                                                                                                               | N/A      |
| Outcome data              | 15*      | Report numbers of outcome events or summary measures                                                                                                                                              | 8        |

|    |                          |    |                                                                                                                                                                                                              |        |
|----|--------------------------|----|--------------------------------------------------------------------------------------------------------------------------------------------------------------------------------------------------------------|--------|
| 1  |                          |    |                                                                                                                                                                                                              |        |
| 2  |                          |    |                                                                                                                                                                                                              |        |
| 3  |                          |    |                                                                                                                                                                                                              |        |
| 4  |                          |    |                                                                                                                                                                                                              |        |
| 5  |                          |    |                                                                                                                                                                                                              |        |
| 6  |                          |    |                                                                                                                                                                                                              |        |
| 7  |                          |    |                                                                                                                                                                                                              |        |
| 8  |                          |    |                                                                                                                                                                                                              |        |
| 9  |                          |    |                                                                                                                                                                                                              |        |
| 10 |                          |    |                                                                                                                                                                                                              |        |
| 11 |                          |    |                                                                                                                                                                                                              |        |
| 12 |                          |    |                                                                                                                                                                                                              |        |
| 13 |                          |    |                                                                                                                                                                                                              |        |
| 14 |                          |    |                                                                                                                                                                                                              |        |
| 15 |                          |    |                                                                                                                                                                                                              |        |
| 16 |                          |    |                                                                                                                                                                                                              |        |
| 17 |                          |    |                                                                                                                                                                                                              |        |
| 18 |                          |    |                                                                                                                                                                                                              |        |
| 19 |                          |    |                                                                                                                                                                                                              |        |
| 20 |                          |    |                                                                                                                                                                                                              |        |
| 21 |                          |    |                                                                                                                                                                                                              |        |
| 22 |                          |    |                                                                                                                                                                                                              |        |
| 23 |                          |    |                                                                                                                                                                                                              |        |
| 24 |                          |    |                                                                                                                                                                                                              |        |
| 25 |                          |    |                                                                                                                                                                                                              |        |
| 26 |                          |    |                                                                                                                                                                                                              |        |
| 27 |                          |    |                                                                                                                                                                                                              |        |
| 28 |                          |    |                                                                                                                                                                                                              |        |
| 29 |                          |    |                                                                                                                                                                                                              |        |
| 30 |                          |    |                                                                                                                                                                                                              |        |
| 31 |                          |    |                                                                                                                                                                                                              |        |
| 32 |                          |    |                                                                                                                                                                                                              |        |
| 33 |                          |    |                                                                                                                                                                                                              |        |
| 34 |                          |    |                                                                                                                                                                                                              |        |
| 35 |                          |    |                                                                                                                                                                                                              |        |
| 36 |                          |    |                                                                                                                                                                                                              |        |
| 37 |                          |    |                                                                                                                                                                                                              |        |
| 38 |                          |    |                                                                                                                                                                                                              |        |
| 39 |                          |    |                                                                                                                                                                                                              |        |
| 40 |                          |    |                                                                                                                                                                                                              |        |
| 41 |                          |    |                                                                                                                                                                                                              |        |
| 42 |                          |    |                                                                                                                                                                                                              |        |
| 43 |                          |    |                                                                                                                                                                                                              |        |
| 44 |                          |    |                                                                                                                                                                                                              |        |
| 45 |                          |    |                                                                                                                                                                                                              |        |
| 46 |                          |    |                                                                                                                                                                                                              |        |
| 47 |                          |    |                                                                                                                                                                                                              |        |
| 48 |                          |    |                                                                                                                                                                                                              |        |
| 49 |                          |    |                                                                                                                                                                                                              |        |
| 50 |                          |    |                                                                                                                                                                                                              |        |
| 51 |                          |    |                                                                                                                                                                                                              |        |
| 52 |                          |    |                                                                                                                                                                                                              |        |
| 53 |                          |    |                                                                                                                                                                                                              |        |
| 54 |                          |    |                                                                                                                                                                                                              |        |
| 55 |                          |    |                                                                                                                                                                                                              |        |
| 56 |                          |    |                                                                                                                                                                                                              |        |
| 57 |                          |    |                                                                                                                                                                                                              |        |
| 58 |                          |    |                                                                                                                                                                                                              |        |
| 59 |                          |    |                                                                                                                                                                                                              |        |
| 60 |                          |    |                                                                                                                                                                                                              |        |
|    | Main results             | 16 | (a) Give unadjusted estimates and, if applicable, confounder-adjusted estimates and their precision (eg, 95% confidence interval). Make clear which confounders were adjusted for and why they were included | 9      |
|    |                          |    | (b) Report category boundaries when continuous variables were categorized                                                                                                                                    | 8      |
|    |                          |    | (c) If relevant, consider translating estimates of relative risk into absolute risk for a meaningful time period                                                                                             | N/A    |
|    | Other analyses           | 17 | Report other analyses done—eg analyses of subgroups and interactions, and sensitivity analyses                                                                                                               | 8, 9   |
|    | <b>Discussion</b>        |    |                                                                                                                                                                                                              |        |
|    | Key results              | 18 | Summarise key results with reference to study objectives                                                                                                                                                     | 10     |
|    | Limitations              | 19 | Discuss limitations of the study, taking into account sources of potential bias or imprecision. Discuss both direction and magnitude of any potential bias                                                   | 12     |
|    | Interpretation           | 20 | Give a cautious overall interpretation of results considering objectives, limitations, multiplicity of analyses, results from similar studies, and other relevant evidence                                   | 10, 11 |
|    | Generalisability         | 21 | Discuss the generalisability (external validity) of the study results                                                                                                                                        | 10, 11 |
|    | <b>Other information</b> |    |                                                                                                                                                                                                              |        |
|    | Funding                  | 22 | Give the source of funding and the role of the funders for the present study and, if applicable, for the original study on which the present article is based                                                | 13     |

# BMJ Open

## Determinants of COVID-19 related knowledge and preventive behaviors among students in re-opened secondary schools: cross-sectional study

|                                 |                                                                                                                                                                                                                                                                                                                                                                                                    |
|---------------------------------|----------------------------------------------------------------------------------------------------------------------------------------------------------------------------------------------------------------------------------------------------------------------------------------------------------------------------------------------------------------------------------------------------|
| Journal:                        | <i>BMJ Open</i>                                                                                                                                                                                                                                                                                                                                                                                    |
| Manuscript ID                   | bmjopen-2021-050189.R2                                                                                                                                                                                                                                                                                                                                                                             |
| Article Type:                   | Original research                                                                                                                                                                                                                                                                                                                                                                                  |
| Date Submitted by the Author:   | 13-Apr-2021                                                                                                                                                                                                                                                                                                                                                                                        |
| Complete List of Authors:       | Handebo, Simegnaw; University of Gondar, Department of Health Education and Behavioral Sciences<br>Adugnaw, Asmamaw; University of Gondar, Department of Health Education and Behavioral Sciences<br>Kassie, Ayenew; University of Gondar, Department of Health Education and Behavioral Sciences<br>Shitu, Kegnigie; University of Gondar, Department of Health Education and Behavioral Sciences |
| <b>Primary Subject Heading</b>: | Public health                                                                                                                                                                                                                                                                                                                                                                                      |
| Secondary Subject Heading:      | Global health, Infectious diseases                                                                                                                                                                                                                                                                                                                                                                 |
| Keywords:                       | COVID-19, PUBLIC HEALTH, PREVENTIVE MEDICINE                                                                                                                                                                                                                                                                                                                                                       |
|                                 |                                                                                                                                                                                                                                                                                                                                                                                                    |

SCHOLARONE™  
Manuscripts





I, the Submitting Author has the right to grant and does grant on behalf of all authors of the Work (as defined in the below author licence), an exclusive licence and/or a non-exclusive licence for contributions from authors who are: i) UK Crown employees; ii) where BMJ has agreed a CC-BY licence shall apply, and/or iii) in accordance with the terms applicable for US Federal Government officers or employees acting as part of their official duties; on a worldwide, perpetual, irrevocable, royalty-free basis to BMJ Publishing Group Ltd ("BMJ") its licensees and where the relevant Journal is co-owned by BMJ to the co-owners of the Journal, to publish the Work in this journal and any other BMJ products and to exploit all rights, as set out in our [licence](#).

The Submitting Author accepts and understands that any supply made under these terms is made by BMJ to the Submitting Author unless you are acting as an employee on behalf of your employer or a postgraduate student of an affiliated institution which is paying any applicable article publishing charge ("APC") for Open Access articles. Where the Submitting Author wishes to make the Work available on an Open Access basis (and intends to pay the relevant APC), the terms of reuse of such Open Access shall be governed by a Creative Commons licence – details of these licences and which [Creative Commons](#) licence will apply to this Work are set out in our licence referred to above.

Other than as permitted in any relevant BMJ Author's Self Archiving Policies, I confirm this Work has not been accepted for publication elsewhere, is not being considered for publication elsewhere and does not duplicate material already published. I confirm all authors consent to publication of this Work and authorise the granting of this licence.

1  
2  
3 1 **Determinants of COVID-19 related knowledge and preventive behaviors among**  
4 **students in re-opened secondary schools: cross-sectional study**

5  
6  
7  
8 3 **Simegnew Handebo <sup>1\*</sup> Asmamaw Adugnaw<sup>1</sup> Ayenew Kassie<sup>1</sup> Kegnie Shitu<sup>1</sup>**

9  
10 4 <sup>1</sup> Department of Health Education and Behavioral Sciences, Institute of public health, College of  
11 Medicine and Health Sciences, University of Gondar, Gondar, Ethiopia.  
12  
13

14 6

15 7

16 8

17  
18  
19 9 **Email addresses:**

20 10 Simegnew Handebo (SH): [hsimegnew@yahoo.com](mailto:hsimegnew@yahoo.com)

21 11 Asmamaw Adugna (AA): [asmamaw2727@gmail.com](mailto:asmamaw2727@gmail.com)

22 12 Ayenew Kassie (AK): [kassieayenew@gmail.com](mailto:kassieayenew@gmail.com)

23 13 Kegnie Shitu (KS): [kegnsh@gmail.com](mailto:kegnsh@gmail.com)  
24  
25  
26  
27  
28  
29  
30  
31  
32  
33  
34

35 17 **\*Corresponding author (SH)**

36 18 Email: [hsimegnew@yahoo.com](mailto:hsimegnew@yahoo.com)

37 19 P.O.Box- 196

38 20 Telephone: +251-912-490659  
39  
40  
41  
42  
43  
44  
45  
46  
47  
48  
49  
50  
51  
52  
53  
54  
55  
56  
57  
58  
59  
60

## 1     2     3     4     5     6     7     8     9     10     11     12     13     14     15     16     17     18     19     20     21     22     23     24     25     26     27     28     29     30     31     32     33     34     35     36     37     38     39     40     41     42     43     44     45     46     47     48     49     50     51     52     53     54     55     56     57     58     59     60

### 1     **Abstract**

2     **Purpose:** In Ethiopia, more than 26 million students have been out of the classroom for nearly  
3     nine months. On September 18th, the Ethiopian Minister of Health advised the Parliament the  
4     possibility of reopening schools provided certain conditions were met. Schools are currently  
5     reopening in the country for the first time since March, 2020.

6     **Objective:** This study assessed the knowledge and preventive health behaviors toward COVID-  
7     19 and associated factors among secondary school students.

8     **Design, setting, participants, and outcome measures:** An institution-based cross-sectional  
9     study was conducted from October to December, 2020 in Gondar city, Northwest Ethiopia. A total  
10    of 370 secondary school students were included. Bivariable and multivariable ordinal logistic  
11    regression model were fitted to identify the predictors of knowledge about COVID-19. Simple and  
12    multiple linear regression analysis were done to identify factors associated with preventive  
13    behavior. A p-value less than 0.05 was used to declare statistical significance.

14    **Results:** Only one fourth (23.5%, 95%CI: 19.5, 28.1) of the participants had a good knowledge  
15    about COVID-19. The mean score of preventive behavior was  $22.8 \pm SD 6.2$ . Marital status,  
16    religion, father education, living arrangement, and sources of information were significantly  
17    associated with knowledge about COVID-19. Being female and using health professionals as  
18    source of information increased the engagement in preventive behaviors. On the other hand,  
19    student whose father employed in non-governmental organization and other jobs had decreased  
20    engagement in preventive health behaviors.

21    **Conclusion:** Significant number of the students had inadequate knowledge about COVID-19 and  
22    poorly engaged in COVID-19 preventive behavior. Thus, it is suggested to include and disseminate  
23    about COVID-19 in related academic sessions, using school clubs, and mini-medias. The sources  
24    of COVID-19 related information need to strengthen the dissemination of tailored, credible, and  
25    timely message to enhance the knowledge and engagement of the students in preventive behaviors.

## 1 Strengths and limitations of this study

- 2 • Unlike other studies, this study used self-administered approach with COVID-19 safety  
3 precautions taken during questionnaire distribution.
- 4 • A standardized questionnaire with high validity and reliability was used in the study.
- 5 • Study provides an insight into students' knowledge and perspectives on COVID-19  
6 preventive behaviors in re-opened schools.
- 7 • Our study may be limited by social desirability bias due to self-report of the participants.
- 8 • Besides, the study could not show a cause-and-effect relationship, and the findings  
9 represent the situation during the study period.

## 1 BACKGROUND

2 The novel Coronavirus (SARS-CoV-2 or COVID-19) was first reported in December 2019, in  
3 Wuhan, Hubei Province, China [1]. The World Health Organization (WHO) declared the  
4 coronavirus disease as a global pandemic on March 11, 2020 [2]. The coronavirus COVID-19 is  
5 affecting 219 countries and nowadays, it is a public health emergency throughout the world [3].  
6 The fast spread of the disease has taken so many lives and caused massive disruption to families,  
7 societies, and economies all over the world [4]. The latest statistics reveal that coronavirus has  
8 infected more than 101,457,202 people until 21 January, 2021, and led to the deaths of more than  
9 2,184,619 people worldwide [3].

10 The Ethiopian Minister of Health announced the first confirmed the first case of COVID-19 in  
11 Ethiopia on March 13, 2020 [5, 6]. Then after the government of Ethiopia took different public  
12 health measures to prevent the spread of the disease. All primary, secondary and tertiary  
13 educational institutions across the country were closed and all public gatherings were banned,  
14 impacting more than 26 million students. Hand washing and social distancing were the main  
15 preventive measures communicated to the general public [7, 8]. On April 8, 2020 Ethiopian  
16 government declared a State of emergency to intensify the control and prevention of the spread of  
17 the disease [5]. As of January 27, 2021, there were 134,569 confirmed COVID-19 cases and 2,075  
18 deaths from the disease [9].

19 On September 18th, the Ethiopian Minister of Health advised Parliament that it was possible to  
20 reopen schools provided certain conditions were met. The ministry adapted the global guidance  
21 for reopening schools to make them safer and established structures to facilitate the process of  
22 reopening [10]. The knowledge on mode of disease transmission, basic hygiene principles and  
23 other public health measures are important for effective control measures [11]. The government of  
24 Ethiopia is using different strategies to enhance the knowledge, attitude and practices towards  
25 COVID-19 prevention measures and are not motivating the response to COVID-19 [5, 12].

26 During such pandemic the WHO advices everybody to take responsibility and adopt protective  
27 behaviors [13]. The lack of knowledge about the disease would be one of the most common driving  
28 factors for poor adoption of COVID-19 prevention measures and may increase the spread of the  
29 disease as well as the number of new cases [14, 15]. Studies conducted in Ethiopian reported  
30 contradicting findings regarding knowledge and practices towards COVID-19 preventive

1  
2  
3 1 measures among different population [16]. Some reported the existence of good knowledge about  
4  
5 2 COVID-19 and level of prevention practice [17] while others reported poor knowledge and poor  
6  
7 3 practice related to COVID-19 preventive practice [16-18]. Some studies suggested to consider  
8  
9 4 individuals risk perception as a major factor to promote the adherence of preventive measures [5,  
10  
11 5 12, 19].

12  
13 6 Secondary school students have poor knowledge and healthy preventive practices towards  
14  
15 7 COVID-19. The exposure to education intervention had improved knowledge, attitude, and  
16  
17 8 practice of the students [20]. On the other hand, high school students in Ghana had substantial  
18  
19 9 level of knowledge and positive perception of COVID-19 [21]. A couple studies in Europe  
20  
21 10 revealed secondary school present a good level of knowledge, shows appropriate practice, and  
22  
23 11 positive attitude towards COVID-19 at the time of its outbreak [22, 23].

24  
25 12 The Ethiopian government is using an adopted Risk Communication and Community Engagement  
26  
27 13 (RCCE) strategic approach to empower people to adopt preventive and health-seeking behaviors  
28  
29 14 contributing to a reduction in the spread of COVID-19 [5, 24]. The Ethiopian Ministry of Health  
30  
31 15 and Ethiopian Public Health Institute are proactively working on disseminating prevention  
32  
33 16 messages on radio and television, at federal and regional levels, reaching a potential audience of  
34  
35 17 30 million people [25]. In addition, volunteers conducted mobilization activities against COVID-  
36  
37 18 19 in marketplaces, slums and congested public places [26]. However, the knowledge and practices  
38  
39 19 towards COVID-19 among the public is not sufficient enough to tackle the rapidly transmitted  
40  
41 20 disease and undermined the preparedness and responses in the country [5].

42  
43 21 In Ethiopia Schools are reopening after several months of closure. As schools reopen, strict  
44  
45 22 precautionary measures are in place to protect students, teachers, non-teaching staff within the  
46  
47 23 school and community from COVID-19. In such case, the reopening of schools brings an  
48  
49 24 opportunity to empower students as agents of change to adopt the recommended positive behaviors  
50  
51 25 to prevent the spread of COVID-19 [27]. Improved awareness and adaption of preventive  
52  
53 26 behaviors among students facilitate positive changes in the general population through health  
54  
55 27 messages and observation learning. Therefore, we need to understand the magnitude of COVID-  
56  
57 28 19 related knowledge and preventive practice among students in the re-opened high schools. In  
58  
59 29 addition, we also assessed whether socio demographic, social support, and source of COVID-19

1  
2  
3 1 related information were associated with the knowledge, and preventive health behavior towards  
4  
5 2 COVID-19.

### 6 7 3 **METHODS**

#### 8 9 10 4 **Study design and area**

11  
12 5 An institutional based cross-sectional study design was conducted in Gondar city from November  
13  
14 6 to December 2020. Gondar city administration is located at about 727 km away from Addis Ababa,  
15  
16 7 the capital city of Ethiopia, and 180 km away from Bahirdar the capital city of Amhara Regional  
17  
18 8 State. In the city there are 12 governments and 5 private high schools (Grade 9 to Grade 12) with  
19  
20 9 more than 23,200 students [28].

#### 21 22 10 **Sample size and sampling procedure**

23  
24 11 The sample size was calculated using a single population proportion formula; considering 50%  
25  
26 12 (since no previous study found) proportion of students who have good preventive health practice  
27  
28 13 towards COVID-19, 95% confidence interval (CI), marginal error (d) of 5%, and 5% non-response  
29  
30 14 rate. The final sample size was estimated to be 403 participants. The adequacy of the sample size  
31  
32 15 for identifying the predictors of COVID-19 related knowledge preventive behavior was evaluated  
33  
34 16 using power analysis.

35  
36 17 Stratified simple random sampling technique was used to select the study participants. First,  
37  
38 18 stratification was done based on school ownership into private and governmental schools. Then,  
39  
40 19 four governmental (Fasiledes, Fasiledes Third, Azezo, and Hidar 11) and two private secondary  
41  
42 20 schools (Debreselam and Waliya) were selected on random basis. Finally, study participants were  
43  
44 21 selected randomly based on their class roster using Microsoft excel random number generator.

#### 45 46 22 **Study Variables**

47  
48 23 **Preventive health behaviors:** Refers to the participant's practice concerning, handwashing,  
49  
50 24 physical distancing, facemask wearing, so as to prevent COVID-19 infection. It was measured by  
51  
52 25 eight items having five-point response rate ranging from 1 (Never) to 5 (always). The composite  
53  
54 26 score of the preventive behaviors ranged from 7 to 35. The higher score indicates compliance  
55  
56 27 behavior.

1  
2  
3 1 **Knowledge of COVID-19:** Refers to participant's cognition of symptoms, nature and preventive  
4 measures of COVID-19. It was measured by 17 items having three response categories (1 = True,  
5 2 = False and 3 = I don't know). A correct answer was coded as 1 point whereas, the incorrect and  
6 3 unknown answer was recoded as zero. The composite score ranged from 0-17 and categorized  
7 4 using Bloom's cut-off point, as low-level of knowledge (less than 60%; less than 12 score),  
8 5 moderate level of knowledge (60-80%; 13-14 score) and good level of knowledge (80-100%; 15  
9 6 and above score) [29].

## 15 8 **Data collection tools and procedures**

17  
18 9 The data were collected by using pre-tested self-administered questionnaire adapted from different  
19 10 literatures [15, 17]. The questionnaire was prepared in English, then translated to the local  
20 11 language, Amharic. Trained four BSc nurses and two Masters of public health professionals  
21 12 collected the data and supervised the data collection process, respectively. COVID-19 safety  
22 13 measures (physical distancing, wearing masks, and hand hygiene) were taken during the data  
23 14 collection process. The questionnaire had five sections including socio demographic, social  
24 15 support, source of COVID-19 related information, knowledge, and preventive health behavior.  
25 16 Content validity and pretest was done with 6 experts panel discussion and 20 students. It was  
26 17 determined by Item level Content Validity Index (I-CVI) of 0.78 or higher, Scale level Content  
27 18 Validity Index by Universal Agreement (S-CVI/UA) of 0.8 or higher and Scale level Content  
28 19 Validity Index by Average (S-CVI/Ave) 0.9 or higher. Data collectors and supervisors took one-  
29 20 day training on the objective of the study, content of the questionnaire, and ethical issues need to  
30 21 be taken during the data collection process (See the research tool at **Supplementary file**).

## 41 22 **Data processing and analysis**

42  
43 23 Each questionnaire was reviewed for completeness and consistency on daily basis. The internal  
44 24 consistency of the items was checked by Cronbach's alpha. The collected data entered in to  
45 25 EpiData version 4.6 and exported into to STATA version 14 statistical software for analysis.  
46 26 Multicollinearity among the independent variables was assessed using variance inflation factors  
47 27 (VIF) and was in the acceptable range. Descriptive statistics was used to quantify the magnitude  
48 28 of preventive healthy behavior, knowledge and describe the characteristic of the participant.  
49 29 Bivariable and multivariable ordinal logistic regression model was fitted to identify the factors  
50 30 associated with knowledge of COVID-19. Those variables with a p-value of less than 0.25 in the



1 bivariable model were fitted in the multivariable model. The assumptions of ordinal logistic  
2 regression were checked using chi-squared and parallel line tests (the model was well-fitted with  
3 the data). Normality and homogeneity of variances were checked for preventive health behavior  
4 (the variable was normally distributed). Simple linear regression analysis was computed and all  
5 independent variables with p-value less than 0.25 were entered in multiple linear regression. An  
6 unstandardized  $\beta$  coefficient was used to interpret the effect of predictors to preventive health  
7 behavior. Variables with p value less than 0.05 at 95% confidence interval were considered as  
8 statistically significant.

### 9 **Patient and public involvement**

10 This research was done without involving patient on the design and implementation. But the  
11 participants and administrative officials were informed about study objectives. The results will be  
12 disseminated to Gondar City Education Office and through open access publication.

## 13 **RESULTS**

### 14 **Socio demographic characteristics**

15 A total of 370 respondents were participated with a response rate of 91.8%. The non-response was  
16 due to not replying to items on the questionnaire (4.0%), inconsistent responses (2.4%) and not  
17 volunteered without reason (1.8%). More than half of the participant (51.9%) were females. The  
18 higher proportion of the participant were affiliated with Orthodox religion (87.6%), single  
19 (84.6%), and live with their parents (64.1%). The mean age of participants  $18.0 \pm 1.8$  years with the  
20 minimum 15 and maximum 30 years (**Table 1**). With regard to sources of information, television  
21 (55.4%) was the most common source of information about COVID-19 (**Figure 1**).

### 22 **Knowledge about COVID-19**

23 The reliability test of the knowledge about COVID-19 items for Cronbach's alpha was 0.79  
24 According to the Blooms cut-off point nearly half (47.8%) of the participant had low knowledge  
25 about COVID-19. Only one fourth of them (23.5%) had a good knowledge (**Figure 2**). **Table 2**  
26 also presents the details of knowledge about COVID-19.

### 27 **Preventive health behavior**

1 The reliability test of the preventive health behavior items for Cronbach's alpha was 0.79. The  
2 mean of preventive health behavior was 22.8 with standard deviation of 6.2. Two hundred and four  
3 (55.1%, 95% CI: 50.0, 60.2) respondents scored above the mean score of preventive health  
4 behavior (**Table 3**).

### 5 **Predictors of knowledge about COVID-19**

6 Of the variables satisfied the assumption of proportional odds model, age, marital status, religion,  
7 father's educational status, father's occupation, living arrangement, and sources of information for  
8 COVID-19 were associated with knowledge of COVID-19 with a p-value of less than 0.25. After  
9 controlling the confounding variables, marital status, religion, father's education, living  
10 arrangement, and sources of information were significantly associated with knowledge about  
11 COVID-19. The result of ordinal logistic regression analysis showed that the odds of having good  
12 knowledge (verses medium or poor knowledge) were 0.47 times lower for engaged/married  
13 students as compared to single students (AOR=0.47, 95% CI: 0.25, 0.90). The odds of having good  
14 knowledge was nearly 7.71 times higher for students affiliated with other religion as compared to  
15 those affiliated with Orthodox (AOR=1.78, 95%CI: 1.24, 2.55). Students belong to fathers with  
16 diploma and above education were 2.56 times higher odds of good knowledge than students belong  
17 to father with no education (AOR=2.56, 95%CI: 1.07, 6.12). The odds of having good knowledge  
18 was nearly 0.32 times lower for students living alone than those who lived with their parents  
19 (AOR=0.32, 95%CI: 0.15, 0.69). Students who used television (AOR=6.68, 95%CI: 2.73, 16.36),  
20 radio (AOR=2.91, 95%CI: 1.04, 8.11), and health profession (AOR=4.15, 95%CI: 1.51, 11.40) as  
21 sources of information on COVID-19 were 6.68, 2.91, and 4.15 times higher odds of good  
22 knowledge than those who used Facebook, respectively (**Table 4**).

### 23 **Predictors of COVID-19 preventive health behaviors**

24 In simple linear regression, sex, marital status, grade level, mother's educational status, father's  
25 educational status, mother's occupation and father's occupation, living arrangement, source of  
26 information about COVID-19, and social support were significant at with a p-value  $\leq 0.25$  and  
27 entered in to multiple linear regression. In the multiple linear regression analysis, sex ( $\beta$ :1.35 95%  
28 CI: 0.02, 2.68), having father employed in non-governmental organization (NGO) ( $\beta$ : -2.37, 95%  
29 CI: -4.71, -0.02), other jobs ( $\beta$ : -3.46, 95% CI: -6.49, -0.43) and health profession as source of  
30 information ( $\beta$ :3.00, 95% CI: 0.20, 5.80) were statistically significant at a p-value of less than 0.05.

1  
2  
3 1 The standardized regression coefficient revealed that source of information was the most important  
4 predictor of adoption of COVID-19 preventive measures. The analysis of this study showed that  
5 2 female students were 1.35 times more frequently engaged in preventive health behavior than  
6 3 males. Compared to students with father employed in government institution, engagement in  
7 4 COVID-19 preventive behavior decreased by 2.37 and 3.46 times among those whose father was  
8 5 employed in NGO and other jobs, respectively. Students who used health professionals as sources  
9 6 of information were three time more engaged in preventive health behavior than those who use  
10 7 Facebook as source of information provided that other variables are kept constant (**Table 5**).

## 11 9 **DISCUSSION**

12 10 This study assessed the COVID-19 related knowledge and preventive health behavior of the  
13 11 student and associated factors in the reopened schools, Northwest Ethiopia. Student's adherence  
14 12 to COVID-19 preventive behaviors (physical distancing, wearing a mask, and hand washing) are  
15 13 a key to sustain the education in the pandemic era. Previous studies addressed the knowledge,  
16 14 attitude, and practices of COVID-19 immediately after onset of the pandemics in Ethiopia [16-18].  
17 15 These studies revealed lack of knowledge, attitude and preventive practice among different  
18 16 populations [16, 19]. Since the adherence of these behaviors reduce the spread of the disease  
19 17 among the students, teachers, and community, the current study focused the knowledge of the  
20 18 student and their level of engagement in preventive behavior.

21 19 A lack of adequate knowledge is probably the driving force for poor preventive practice as well as  
22 20 the spread of the disease. In this study only about half (52.2%) of the students had at least moderate  
23 21 knowledge about COVID-19. This study result is higher than studies done among health science  
24 22 student in Arbaminch [30] and secondary school student in Egypt (before intervention) [20]. On  
25 23 the other hands, this finding is lower than studied done among college student in Amhara region,  
26 24 undergraduate student in Debre Berhan University, undergraduate medical students in Egypt, high  
27 25 school students in Ghana, Iranian medical students, Libya, Jordan, and Portugal [21-23, 31-36].  
28 26 The discrepancy is may be due difference in access and use of information sources. The result  
29 27 highlights the need to address the gap of knowledge timely using tailored and effective approaches.  
30 28 The authors recommended briefing sessions or including information about the disease is health  
31 29 related subjects/ lessons may enhance the knowledge of the students.

1  
2  
3 1 This study showed students had low preventive health behaviors against COVID-19 with 55.1%  
4  
5 2 respondents scored above the mean score. Contrary to scientific recommendation social distancing,  
6  
7 3 hand washing, and wearing of a mask were not highly prevalent practices among students. Similar  
8  
9 4 finding is reported by studies done among university students in Debre Birhan university [32] and  
10  
11 5 secondary school student in Egypt [20]. Contrary to this study among secondary school students  
12  
13 6 in in Italy [23] and Portugal [22] reported that students are practicing appropriate preventive  
14  
15 7 behaviors. The difference may be due to difference in COVID-19 related information access, risk  
16  
17 8 perception, and enforcement of COVID related measures in nations. In addition, college student  
18  
19 9 in Amhara region, medical students in Egypt, Iran, Libya, Jordan, and University students in  
20  
21 10 Birzeit (Palestine) [23, 31, 33, 35-37] implemented proper strategies to prevent its spread of the  
22  
23 11 disease. This may be due too high-risk perception, advanced knowledge about the disease, and  
24  
25 12 previous experience of infection prevention practice enabled them to properly implement COVID-  
26  
27 13 19 preventive health behavior. School authorities with respected responsible health authorities  
28  
29 14 need to identify, meet, and coordinate the implementation of preventive behaviors at schools. The  
30  
31 15 promotion and awareness creation activities also need to be revised according to the situation  
32  
33 16 evolution.

34  
35 17 The analysis of predictors of knowledge about COVID-19 revealed that engaged/married and  
36  
37 18 students living alone had lower level of knowledge. Similarly, study done among college student  
38  
39 19 in Amhara region reported single students had good knowledge about COVID-19 [31]. The other  
40  
41 20 study health science student in Arbaminch reported that married and student living with family  
42  
43 21 members had good knowledge than their counterparts [30]. Whereas, On the other hand, being  
44  
45 22 affiliated with other religions, having educated father, and using television, radio, and health  
46  
47 23 professional as a source of information were positively associated with good knowledge. Health  
48  
49 24 professionals and electronic medias were the reliable source of information and promote health  
50  
51 25 awareness and engagement in preventive measures. Study done in Debre Berhan University  
52  
53 26 reported that source of information about COVID-19 associated with the mean knowledge [32].  
54  
55 27 Elsewhere study done in Ghana reported that increased access of information from electronic  
56  
57 28 media and the role of peers and family members in dissemination of COVID-19 related  
58  
59 29 information [21].

1  
2  
3 1 The analysis on the predictor of preventive health behavior among the student showed that being  
4 2 female and health professionals' source of information increased the engagement in preventive  
5 3 behaviors. Although those who had increased exposure to electronic medias seemed to be more  
6 4 aware of preventive measures to avoid COVID-19 spread, there is still the possibility that  
7 5 misinformation on the internet can have produced the opposite. We found that females engaged  
8 6 more in preventive health behaviors than males. This is allied with a tendency of females to be  
9 7 more health-conscious and engaged in preventive behavior [38]. Moreover, the low preventive  
10 8 behavior in men may be due to their perceptions of masculinity which reduces their motivation to  
11 9 accept preventive health behavior [24, 39]. Similar findings were reported by studies done in  
12 10 Portugal, medical students in Egypt, university students in Palestine, and China [22, 33, 37, 40].  
13 11 Health messages and other health promotion initiatives at schools need to introduce gender-  
14 12 specific tailor preventive measures in order to enhance their efficiency. On the other hand, student  
15 13 whose father employed in non-governmental organization and other jobs had decreased  
16 14 engagement in preventive health behaviors. In this study the level of knowledge of the participant  
17 15 was not significant predictor for preventive health behavior. This may be due to knowledge is  
18 16 neither sufficient nor necessary to trigger a behavioral change (adopting preventive behaviors).

19 17 This study has certain limitations to be noted. This is cross sectional study, could not show a cause-  
20 18 and-effect relationship, and the findings represent the situation during the study period. The  
21 19 knowledge and preventive practices among the student may change rapidly. Besides, this study  
22 20 was based on self-report of the participant. There would be recall and social desirability that can  
23 21 bias the findings.

## 22 **CONCLUSIONS**

23 23 In this study, substantial number of the students had inadequate knowledge about COVID-19 and  
24 24 poorly engaged in COVID-19 preventive health behavior. The research results indicated that  
25 25 engaged/married and students living alone had a lower level of knowledge. Being affiliated with  
26 26 other religions, having educated father, and using television, radio, and health professional as a  
27 27 source of information were all associated with good knowledge. Sex, father occupation and source  
28 28 of information have all contributed to COVID-19 preventive behaviors. Therefore, the  
29 29 effectiveness of COVID-19 prevention measures needs to be well established among the students.  
30 30 Interventions that increase the awareness of the students and promote health behaviors need to be

1  
2  
3 1 strengthen in secondary schools. It is suggested to introduce COVID-19 related message need to  
4 be disseminated in related academic sessions, using school clubs, and mini-medias. In addition,  
5 2 the main sources of COVID-19 related information (health professionals, television, and radio)  
6 3 need to strengthen the dissemination of tailored, credible, and timely message to enhance the  
7 4 knowledge and engagement the student in preventive health behaviors.  
8 5  
9 6

## 6 **Acknowledgements**

7 The authors would like to thank the study participant and data collectors for their cooperation.

## 8 **Contributors**

9 SH AA AK and KS conceived and designed the study. SH AA AK and KS participated in data  
10 processing and management. SH analyzed the data and drafted the manuscript. AK and KS  
11 participated in data analysis and interpretation. SH AA AK and KS reviewed the drafted  
12 manuscript. All authors read and approved the final manuscript.

## 13 **Funding**

14 The author received no specific funding for this work

## 15 **Competing interests**

16 The author declare that he has no conflict of interest

## 17 **Consent for publication**

18 Not applicable

## 19 **Data availability statement**

20 Data will be available from the corresponding author upon reasonable request.

## 21 **Ethics Statement**

22 Ethical clearance was obtained from the Institutional Review Board of the University of Gondar  
23 with a reference number of V/P/RCS/05/588/2020. Letter of permission was obtained from Gondar  
24 city administrative education office. After the purpose and objective of the study have been  
25 informed, written consent was obtained from each study participant. Any identifiers of the study  
26 participants were not recorded. Indeed, for the participants with age less than 18, family/guardian

1 informed consent and an assent from themselves was taken. Finally, health information was  
2 provided for the study participants about the coronavirus and relative preventive measures.

### 3 **References**

- 4 1. Zu ZY, Jiang MD, Xu PP, Chen W, Ni QQ, Lu GM, Zhang LJ. Coronavirus disease 2019  
5 (COVID-19): a perspective from China. *Radiology*. 2020 Aug;296(2): E15-25.
- 6 2. World health organization: Listings of WHO's response to COVID-19  
7 <https://www.who.int/news/item/29-06-2020-covid-timeline>. Accessed 28 January 2021.
- 8 3. Worldometers. Covid-19 coronavirus pandemic; 2020. Available from:  
9 <https://www.worldometers.info/coronavirus/>. Accessed 28 January 2021.
- 10 4. COVID-19: One year later – WHO Director-General's new year message  
11 [https://www.who.int/news/item/30-12-2020-covid-19-anniversary-and-looking-forward-](https://www.who.int/news/item/30-12-2020-covid-19-anniversary-and-looking-forward-to-2021)  
12 [to-2021](https://www.who.int/news/item/30-12-2020-covid-19-anniversary-and-looking-forward-to-2021). Accessed 28 January 2021.
- 13 5. Zikargae MH. COVID-19 in Ethiopia: Assessment of How the Ethiopian Government has  
14 Executed Administrative Actions and Managed Risk Communications and Community  
15 Engagement. *Risk management and healthcare policy*. 2020; 13:2803.
- 16 6. Ministry of Health and Ethiopian Public Health Institute. Ethiopia Confirmed the First Case  
17 of Covid-19 [https://www.ephi.gov.et/images/pictures/pic\\_2011/pic\\_2012/First-English-](https://www.ephi.gov.et/images/pictures/pic_2011/pic_2012/First-English-Press-release-1.pdf)  
18 [Press-release-1.pdf](https://www.ephi.gov.et/images/pictures/pic_2011/pic_2012/First-English-Press-release-1.pdf)
- 19 7. Ministry of Education. Concept Note for Education Sector COVID 19-Preparedness and  
20 Response Plan. Addis Ababa, Ethiopia: 3<sup>rd</sup> April 2020.
- 21 8. Baye K. COVID-19 prevention measures in Ethiopia: Current realities and prospects. *Intl*  
22 *Food Policy Res Inst*; 2020 May 12.
- 23 9. WHO Health Emergency Dashboard; Ethiopia. Available at:  
24 <https://covid19.who.int/region/afro/country/et>. Accessed 28, January 2021.
- 25 10. UNICEF Ethiopia. The case for safely reopening schools in Ethiopia. Available at:  
26 <https://www.unicef.org/ethiopia/stories/case-safely-reopening-schools-ethiopia>. Accessed  
27 28, January 2021.
- 28 11. Erfani A, Shahriarirad R, Ranjbar K, Mirahmadizadeh A, Moghadami M. Knowledge,  
29 attitude and practice toward the novel coronavirus (COVID-19) outbreak: a population-  
30 based survey in Iran. *Bull World Health Organ*. 2020 Mar 30;30(10.2471).

12. Geda NR, Legesse B, Kebede SW, Fikadu B. Perceptions of Risks and Impacts of COVID-19 Among the Public in Ethiopia. *Frontier: Insights*; 2020.
13. World Health Organization. *Managing epidemics: key facts about major deadly diseases*. World Health Organization; 2018. <https://apps.who.int/iris/handle/10665/272442>.
14. World Health Organization. *RCCE ACTION PLAN GUIDANCE: COVID-19 preparedness & response*. <https://www.who.int/docs/default-source/coronaviruse/covid19-rcce-guidance-final-brand.pdf>.
15. Zegarra-Valdivia J, Vilca BN, Guerrero RJ. Knowledge, perception and attitudes in Regard to COVID-19 Pandemic in Peruvian Population, 2020.
16. Teferi SC. A Review on Knowledge, Attitude, and Practice during the COVID-19 Pandemic in Ethiopia. *Int J Virol Infect Dis*. 2020;5(2): 040-044.
17. Kebede Y, Yitayih Y, Birhanu Z, Mekonen S, Ambelu A. Knowledge, perceptions and preventive practices towards COVID-19 early in the outbreak among Jimma university medical center visitors, Southwest Ethiopia. *PloS one*. 2020 May 21;15(5):e0233744.
18. Tesfaye ZT, Yismaw MB, Negash Z, Ayele AG. COVID-19-related knowledge, attitude and practice among hospital and community pharmacists in Addis Ababa, Ethiopia. *Integrated Pharmacy Research & Practice*. 2020; 9:105.
19. Girma S, Agenagnew L, Beressa G, Tesfaye Y, Alenko A. Risk perception and precautionary health behavior toward COVID-19 among health professionals working in selected public university hospitals in Ethiopia. *Plos one*. 2020 Oct 29;15(10):e0241101.
20. Ayed MM, Mahmoud TM, Kamal FE. Impact of Teaching Program Regarding COVID-19 on Knowledge, Attitudes, Practices among Student.
21. IBk L, Apanga PA, Kumbeni MT, Akunvane R, Akparibo R. Knowledge and perceptions on COVID-19 among Senior High School students in Ghana: a cross-sectional study.
22. Alves RF, Samorinha C, Precioso J. Knowledge, attitudes and preventive behaviors toward COVID-19: a study among higher education students in Portugal. *Journal of Health Research*. 2020 Nov 11.
23. Souli D, Dilucca M. Knowledge, attitude and practice of secondary school students toward COVID-19 epidemic in Italy: a cross selectional study. *bioRxiv*. 2020 Jan 1.



- 1 24. Ministry of Health and Ethiopian Public Health Institute. Risk Communication and  
2 Community Engagement Strategy for COVID-19 Outbreak Response in Ethiopia. RCCE.  
3 Addis Ababa, Ethiopia: MoH & EPHI; 2020.
- 4 25. UNICEF. Creating awareness about COVID-19 in Ethiopia. Available at:  
5 [https://www.unicef.org/ethiopia/media/2716/file/COVID%2019%20Response%20update](https://www.unicef.org/ethiopia/media/2716/file/COVID%2019%20Response%20update%20#1.pdf)  
6 [%20#1.pdf](https://www.unicef.org/ethiopia/media/2716/file/COVID%2019%20Response%20update%20#1.pdf).
- 7 26. UNICEF Ethiopia. Available at: [https://www.unicef.org/ethiopia/stories/youth-volunteers-](https://www.unicef.org/ethiopia/stories/youth-volunteers-take-streets-mobilize-against-covid-19-ethiopia-0)  
8 [take-streets-mobilize-against-covid-19-ethiopia-0](https://www.unicef.org/ethiopia/stories/youth-volunteers-take-streets-mobilize-against-covid-19-ethiopia-0). Accessed 28, January 2021.
- 9 27. World Health Organization: Ethiopia. News and Press Release. 31 December 2020.  
10 Available at: <https://www.who.int/emergencies/diseases/novel-coronavirus-2019/advice>.  
11 Accessed 28, January 2021.
- 12 28. Gorndar City administration Educational Affairs, Preparatory School students list by sex  
13 and school type, 2019/2020.
- 14 29. Bloom BS. (1956) Taxonomy education. New York: David McKay.
- 15 30. Wogayehu B, Taye W, Faraja K. Knowledge regarding 2019 novel coronavirus (2019-  
16 nCoV) infection among final year health science students at Arbaminch College of Health  
17 Sciences, Southern Ethiopia: a cross-sectional study.
- 18 31. Tadesse AW, Melese N, Eshetie S, Chane M, Ali A. Knowledge, Attitude, and Practice  
19 and Associated Factors towards COVID-19 among College Students in Amhara Region,  
20 Ethiopia; A Cross-Sectional Study.
- 21 32. Aynalem YA, Akalu TY, Gebresellassie B, Sharew NT, Shiferaw WS. Assessment of  
22 undergraduate student knowledge, practices, and attitude towards COVID-19 in Debre  
23 Berhan University, Ethiopia.
- 24 33. Soltan EM, El-Zoghby SM, Salama HM. Knowledge, Risk Perception, and Preventive  
25 Behaviors Related to COVID-19 Pandemic Among Undergraduate Medical Students in  
26 Egypt. SN comprehensive clinical medicine. 2020 Dec;2(12):2568-75.
- 27 34. Taghrir MH, Borazjani R, Shiraly R. COVID-19 and Iranian medical students; a survey on  
28 their related-knowledge, preventive behaviors and risk perception. Archives of Iranian  
29 medicine. 2020 Apr 1;23(4):249-54.
- 30 35. Elhadi M, Msherghi A, Alsoufi A, Buzreg A, Bouhuwaish A, Khaled A, Alhadi A,  
31 Alameen H, Biala M, Elgherwi A, Elkhafeefi F. Knowledge, preventive behavior and risk

- 1 perception regarding COVID-19: a self-reported study on college students. The Pan  
2 African Medical Journal. 2020 Jun 11;35(75).
- 3 36. Khasawneh AI, Humeidan AA, Alsulaiman JW, Bloukh S, Ramadan M, Al-Shatanawi TN,  
4 Awad HH, Hijazi WY, Al-Kammash KR, Obeidat N, Saleh T. Medical students and  
5 COVID-19: Knowledge, attitudes, and precautionary measures. A descriptive study from  
6 Jordan. *Frontiers in public health*. 2020;8.
- 7 37. Naseef HA, Hadba LS, Humos LA, Shaheen RN, Mitwasi TT, El-Khairi L. Knowledge,  
8 attitudes and practices about Coronavirus disease (COVID-19) among Birzeit University  
9 students: A cross-sectional study.
- 10 38. Hiller J, Schatz K, Drexler H. Gender influence on health and risk behavior in primary  
11 prevention: a systematic review. *Journal of Public Health*. 2017 Aug 1;25(4):339-49.
- 12 39. Vaidya V, Partha G, Karmakar M. Gender differences in utilization of preventive care  
13 services in the United States. *Journal of women's health*. 2012 Feb 1;21(2):140-5.
- 14 40. Peng Y, Pei C, Zheng Y, Wang J, Zhang K, Zheng Z, Zhu P. Knowledge, attitude and  
15 practice associated with COVID-19 among university students: a cross-sectional survey in  
16 China.

1 **Tables**

2 **Table 1:** Socio-demographic characteristics of secondary school students in Gondar City,  
 3 Northwest Ethiopia, 2021 (n=370).

| Variables            | Description              | Knowledge about COVID-19 |                |            | p-value |
|----------------------|--------------------------|--------------------------|----------------|------------|---------|
|                      |                          | Poor n (%)               | Moderate n (%) | Good n (%) |         |
| Age                  | 15-19                    | 150 (84.7)               | 95 (89.6)      | 77 (88.5)  | 0.446   |
|                      | 20-30                    | 27 (15.3)                | 11 (10.4)      | 10 (11.5)  |         |
| Sex                  | Male                     | 86 (49.2)                | 51 (47.2)      | 41 (47.1)  | 0.0499  |
|                      | Female                   | 90 (50.8)                | 56 (52.8)      | 46 (52.9)  |         |
| Marital status       | Single                   | 142 (80.2)               | 96 (90.6)      | 75 (86.2)  | 0.059   |
|                      | Engaged/married          | 35 (19.8)                | 10 (9.4)       | 12 (13.8)  |         |
| Grade                | 10th                     | 80 (45.2)                | 39 (36.8)      | 38 (43.7)  | 0.495   |
|                      | 11th                     | 39 (22.0)                | 33 (31.1)      | 21 (24.1)  |         |
|                      | 12th                     | 58 (32.8)                | 34 (32.1)      | 28 (32.2)  |         |
| Religion             | Orthodox                 | 161 (90.9)               | 91 (85.8)      | 72 (82.8)  | 0.344   |
|                      | Muslim                   | 14 (7.9)                 | 13 (12.3)      | 12 (13.8)  |         |
|                      | Others                   | 2 (1.2)                  | 2 (1.9)        | 3 (3.4)    |         |
| Mother's occupation  | Housewife                | 126 (71.2)               | 75 (70.8)      | 61 (70.1)  | 0.986   |
|                      | Government employee      | 20 (11.3)                | 15 (14.2)      | 12 (13.8)  |         |
|                      | Marchant                 | 17 (9.6)                 | 9 (8.5)        | 7 (8.1)    |         |
|                      | NGO employee             | 5 (2.8)                  | 4 (3.8)        | 4 (4.6)    |         |
|                      | Farmer                   | 4 (2.3)                  | 1 (0.9)        | 2 (2.3)    |         |
|                      | Other                    | 5 (2.8)                  | 2 (1.9)        | 1 (1.2)    |         |
| Father's occupation  | Government Employee      | 34 (19.2)                | 28 (26.4)      | 30 (34.5)  | 0.039   |
|                      | NGO employee             | 17 (9.6)                 | 11 (10.4)      | 14 (16.1)  |         |
|                      | Merchant                 | 43 (24.3)                | 29 (27.4)      | 21 (24.1)  |         |
|                      | Farmer                   | 72 (40.7)                | 31 (29.3)      | 18 (20.7)  |         |
|                      | other                    | 11 (6.2)                 | 7 (6.6)        | 4 (4.6)    |         |
| Mother's educational | Unable to read and write | 71 (40.1)                | 32 (30.2)      | 28 (32.2)  | 0.151   |
|                      | Able to read and write   | 41 (23.2)                | 32 (30.2)      | 16 (18.4)  |         |

|                             |                          |            |           |           |       |
|-----------------------------|--------------------------|------------|-----------|-----------|-------|
| status                      | Primary education        | 31 (17.5)  | 12 (11.3) | 16 (18.4) |       |
|                             | Secondary education      | 24 (13.6)  | 18 (17.0) | 17 (19.5) |       |
|                             | Diploma and above        | 10 (5.7)   | 12 (11.3) | 10 (11.5) |       |
| Father's educational status | Unable to read and write | 39 (22.0)  | 10 (9.4)  | 15 (17.2) | 0.001 |
|                             | Able to read and write   | 59 (33.3)  | 37 (34.9) | 20 (23.0) |       |
|                             | Primary education        | 27 (15.2)  | 20 (18.9) | 12 (13.8) |       |
|                             | Secondary education      | 34 (19.2)  | 23 (21.7) | 13 (14.9) |       |
|                             | Diploma and above        | 18 (10.2)  | 16 (15.1) | 27 (31.0) |       |
| Living arrangement          | With mother/father       | 103 (58.2) | 70 (66.0) | 64 (73.6) | 0.057 |
|                             | With siblings            | 25 (14.1)  | 13 (12.3) | 11 (12.6) |       |
|                             | With relatives           | 14 (7.9)   | 12 (11.3) | 5 (5.8)   |       |
|                             | Alone                    | 31 (17.5)  | 8 (7.6)   | 4 (4.6)   |       |
|                             | Other                    | 4 (2.3)    | 3 (2.8)   | 3 (3.5)   |       |

1  
2  
3  
4  
5  
6  
7  
8  
9  
10  
11  
12  
13  
14  
15  
16  
17  
18  
19  
20  
21  
22  
23  
24  
25  
26  
27  
28  
29  
30  
31  
32  
33  
34  
35  
36  
37  
38  
39  
40  
41  
42  
43  
44  
45  
46  
47  
48  
49  
50  
51  
52  
53  
54  
55  
56  
57  
58  
59  
60

1 **Table 2:** Knowledge about COVID-19 among secondary school students in Gondar City,  
 2 Northwest Ethiopia, 2021 (N= 370).

| S.no | Knowledge Items                                                                                                                                                            | Frequency (%) |            |
|------|----------------------------------------------------------------------------------------------------------------------------------------------------------------------------|---------------|------------|
|      |                                                                                                                                                                            | Wrong         | Correct    |
| K1   | Main clinical symptoms of COVID-19 are fever, cough, shortness of breath, and fatigue                                                                                      | 45 (12.2)     | 325 (87.8) |
| K2   | Unlike the common cold, stuffy nose, runny nose, and sneezing are less common in persons infected with the COVID-19 virus                                                  | 221(59.7)     | 149 (40.3) |
| K3   | COVID-19 symptoms appear within 2–14 days                                                                                                                                  | 120 (32.4)    | 250 (67.6) |
| K4   | Currently, there is no effective treatment or vaccine for COVID-2019, but early symptomatic and supportive treatment can help most patients to recover from the infection. | 160 (43.2)    | 210 (56.8) |
| K5   | Not all persons with COVID-19 will develop severe cases. Those who are elderly, have chronic illnesses, and with suppressed immunity are more likely to be severe cases    | 184 (49.7)    | 186 (50.3) |
| K6   | The corona virus can infect children and adolescents.                                                                                                                      | 136 (36.8)    | 234 (63.2) |
| K7   | Touching or shaking hands of an infected person would result in the infection by the COVID-19 virus.                                                                       | 108 (29.2)    | 262 (70.8) |
| K8   | Touching an object or surface with the virus on it, then touching your mouth, nose, or eyes with the unwashed hand would result in the infection by the COVID-19 virus     | 63 (17.0)     | 307 (83.0) |
| K9   | The COVID-19 virus spreads via respiratory droplets of infected individuals through the air during sneezing or coughing of infected patients.                              | 75 (20.3)     | 295 (79.7) |
| K10  | Persons with COVID-19 cannot infect the virus to others if he has no any symptom of COVID-19                                                                               | 97 (26.2)     | 273 (73.8) |
| K11  | Wearing masks when moving out of home is important to prevent the infection with COVID-19 virus                                                                            | 126 (34.1)    | 244 (65.9) |
| K12  | Children and young adults do not need to take measures to prevent the infection by the COVID-19 virus                                                                      | 101 (27.3)    | 269 (72.7) |
| K13  | To prevent the COVID-19 infection, individuals should avoid going to crowded places such as public transportations, religious places, Hospitals and Workplaces             | 100 (27.0)    | 270 (73.0) |
| K14  | Washing hands frequently with soap and water for at least 20 seconds or use an alcohol-based hand sanitizer (60%) is important to prevent infection with COVID-19          | 123 (33.2)    | 247(66.8)  |
| K15  | Traveling to an infectious area or having contact with someone traveled to an area where the infection present is a risk for developing an infection                       | 98 (26.5)     | 272 (73.5) |

|     |                                                                                                                                 |           |            |
|-----|---------------------------------------------------------------------------------------------------------------------------------|-----------|------------|
| K16 | Isolation and treatment of people who are infected with the COVID-19 virus are effective ways to reduce the spread of the virus | 78 (21.1) | 292 (78.9) |
| K17 | People who have contact with someone infected with the COVID-19 virus should be immediately isolated in a proper place.         | 85 (23.0) | 285 (77.0) |

For peer review only

**Table 3:** COVID-19 preventive behaviors among secondary school students in Gondar city, Northwest Ethiopia, 2021 (n =370)

| S. No | Items                                                                                            | Mean | Standard deviation |
|-------|--------------------------------------------------------------------------------------------------|------|--------------------|
| PH1   | I keep a distance of at least two meters from others.                                            | 2.66 | 1.28               |
| PH2   | I place a tissue paper or bending elbow in front of my mouth and nose when coughing or sneezing. | 3.26 | 1.33               |
| PH3   | I don't shake hands with others and don't kiss them.                                             | 2.92 | 1.30               |
| PH4   | I don't leave the house unless absolutely necessary                                              | 2.66 | 1.32               |
| PH5   | I wash my hands regularly with soap and water for at least 20 seconds every hour.                | 2.85 | 1.28               |
| PH6   | I do not touch my eyes, nose and mouth by hands.                                                 | 2.76 | 1.32               |
| PH7   | I wash my hands with soap and water before touching anything while entering home.                | 2.98 | 1.44               |
| PH8   | I wear facemask consistently whenever I go out to my home.                                       | 2.69 | 1.39               |
|       | Overall preventive behavior standard score                                                       | 2.85 | 0.77               |

**Table 4:** Predictors of knowledge about COVID-19 among secondary school students in Gondar City, North West Ethiopia, 2021 (n=370)

| Variable                                    | Regression coefficient                        | Standard error | p-value | Adjusted Odds ratio | 95% CI for AOR |             |
|---------------------------------------------|-----------------------------------------------|----------------|---------|---------------------|----------------|-------------|
| <b>Age</b>                                  | 15-19 (ref.)                                  |                |         |                     |                |             |
|                                             | 20-30                                         | 0.19           | .34     | 0.58                | 1.21           | 0.62, 2.37  |
| <b>Marital status</b>                       | Single (ref.)                                 |                |         |                     |                |             |
|                                             | Engaged/married                               | -0.75          | 0.33    | 0.02                | 0.47           | 0.25, 0.90  |
| <b>Religion</b>                             | Orthodox (ref.)                               |                |         |                     |                |             |
|                                             | Muslim                                        | 0.40           | 0.35    | 0.25                | 1.46           | 0.74, 2.89  |
|                                             | Other*                                        | 2.04           | 0.84    | 0.01                | 7.71           | 1.50, 39.66 |
| <b>Father's educational status</b>          | Unable to read and write (ref.)               |                |         |                     |                |             |
|                                             | Able to read and write                        | 0.28           | 0.33    | 0.39                | 1.33           | 0.69, 2.55  |
|                                             | Completed primary school                      | 0.22           | 0.39    | 0.57                | 1.24           | 0.58, 2.66  |
|                                             | Completed secondary school                    | 0.06           | 0.39    | 0.89                | 1.06           | 0.49, 2.30  |
| <b>Father's occupation</b>                  | Diploma and higher Government Employee (ref.) | 0.94           | 0.44    | 0.03                | 2.56           | 1.07, 6.12  |
|                                             | NGO employee                                  | 0.29           | 0.38    | 0.44                | 1.34           | 0.64, 2.80  |
|                                             | Merchant                                      | -0.44          | 0.33    | 0.18                | 0.64           | 0.34, 1.23  |
|                                             | Farmer                                        | -0.41          | 0.37    | 0.27                | 0.67           | 0.32, 1.38  |
|                                             | Other                                         | -0.75          | 0.48    | 0.12                | 0.47           | 0.18, 1.20  |
| <b>Living arrangement</b>                   | Parents (ref.)                                |                |         |                     |                |             |
|                                             | Siblings                                      | -0.26          | 0.33    | 0.44                | 0.77           | 0.41, 1.47  |
|                                             | Relatives                                     | -0.30          | 0.38    | 0.44                | 0.74           | 0.35, 1.57  |
|                                             | Alone                                         | -1.14          | 0.40    | 0.00                | 0.32           | 0.15, 0.69  |
| <b>Source of information about COVID-19</b> | Others                                        | -0.27          | 0.66    | 0.69                | 0.77           | 0.21, 2.77  |
|                                             | Facebook (ref.)                               |                |         |                     |                |             |
|                                             | Telegram                                      | 0.81           | 0.59    | 0.17                | 2.24           | 0.70, 7.13  |
|                                             | Television                                    | 1.89           | 0.46    | 0.00                | 6.68           | 2.73, 16.36 |
|                                             | Radio                                         | 1.07           | 0.52    | 0.04                | 2.91           | 1.04, 8.11  |
| <b>Cut 1</b>                                | Health professionals                          | 1.42           | 0.52    | 0.01                | 4.15           | 1.51, 11.40 |
|                                             |                                               | 1.21           | 0.60    |                     |                | 0.04, 2.38  |
| <b>Cut 2</b>                                |                                               | 2.67           | 0.61    |                     |                | 1.48, 3.86  |

\*Other: Catholic and Protestant



**Table 5:** Predictors of COVID-19 preventive health behaviors among secondary school students in Gondar City, North West Ethiopia, 2021 (n=370)

| Variable                                                | Unstandardize<br>d B            | Standardize<br>d β | 95% CI for B |
|---------------------------------------------------------|---------------------------------|--------------------|--------------|
| <b>Sex</b>                                              | Male (ref.)                     |                    |              |
|                                                         | Female                          | 1.35*              | 0.11         |
| <b>Age</b>                                              | 15-19 (ref.)                    |                    |              |
|                                                         | 20-30                           | 0.73               | 0.04         |
| <b>Marital<br/>status</b>                               | Single (ref.)                   |                    |              |
|                                                         | Engaged/married                 | 1.64               | 0.10         |
| <b>Grade</b>                                            | 10 <sup>th</sup> (ref.)         |                    |              |
|                                                         | 11 <sup>th</sup>                | -0.61              | -0.04        |
|                                                         | 12 <sup>th</sup>                | 0.17               | 0.01         |
| <b>Mother's<br/>educational<br/>status</b>              | Unable to read and write (ref.) |                    |              |
|                                                         | Able to read and write          | -1.16              | -0.08        |
|                                                         | Completed primary school        | -0.98              | -0.06        |
|                                                         | Completed secondary school      | -1.33              | -0.08        |
|                                                         | Diploma and higher              | -1.82              | -0.08        |
| <b>Father's<br/>educational<br/>status</b>              | Unable to read and write (ref.) |                    |              |
|                                                         | Able to read and write          | 0.18               | 0.01         |
|                                                         | Completed primary school        | 0.46               | 0.03         |
|                                                         | Completed secondary school      | -0.90              | -0.06        |
|                                                         | Diploma and higher              | -1.20              | -0.07        |
| <b>Mother's<br/>occupation</b>                          | Housewife (ref.)                |                    |              |
|                                                         | Government employee             | -0.72              | -0.04        |
|                                                         | Merchant                        | -1.17              | -0.05        |
|                                                         | NGO employee                    | 2.14               | 0.06         |
|                                                         | Farmer                          | 0.52               | 0.01         |
|                                                         | Other                           | 1.07               | 0.03         |
| <b>Father's<br/>occupation</b>                          | Government Employee (ref.)      |                    |              |
|                                                         | NGO employee                    | -2.37*             | -0.12        |
|                                                         | Merchant                        | -0.25              | -0.02        |
|                                                         | Farmer                          | -0.59              | -0.04        |
|                                                         | Other                           | -3.46*             | -0.13        |
| <b>Living<br/>arrangement</b>                           | Parents (ref.)                  |                    |              |
|                                                         | Siblings                        | 0.60               | 0.03         |
|                                                         | Relatives                       | -0.53              | -0.02        |
|                                                         | Alone                           | 0.02               | 0.01         |
|                                                         | Others                          | 2.42               | 0.06         |
| <b>Source of<br/>information<br/>about<br/>COVID-19</b> | Facebook (ref.)                 |                    |              |
|                                                         | Telegram                        | -0.41              | -0.02        |
|                                                         | Television                      | 0.92               | 0.07         |
|                                                         | Radio                           | -0.12              | -0.01        |
|                                                         | Health professionals            | 3.00*              | 0.17         |

|                       |            |       |      |              |
|-----------------------|------------|-------|------|--------------|
| <b>Social support</b> | 10.32±2.30 | 0.29  | 0.11 | -0.01, 0.58  |
| <b>Constant</b>       |            | 19.84 |      | 15.16, 24.53 |

\*p<0.05, ref. =reference

For peer review only

1  
2  
3  
4  
5  
6  
7  
8  
9  
10  
11  
12  
13  
14  
15  
16  
17  
18  
19  
20  
21  
22  
23  
24  
25  
26  
27  
28  
29  
30  
31  
32  
33  
34  
35  
36  
37  
38  
39  
40  
41  
42  
43  
44  
45  
46  
47  
48  
49  
50  
51  
52  
53  
54  
55  
56  
57  
58  
59  
60

1 **Figure's legends**

2 **Figure 1:** Source of information about COVID-19 among secondary school students in Gondar  
3 City, Northwest Ethiopia, 2021 (N=370).

4 **Figure 2:** Knowledge status about COVID-19 among secondary school students in Gondar City,  
5 Northwest Ethiopia, 2021 (N= 370).

For peer review only



29 **Figure 1:** Source of information about COVID-19 among secondary school students in Gondar  
30 City, Northwest Ethiopia, 2021 (N=370).  
31  
32  
33  
34  
35  
36  
37  
38  
39  
40  
41  
42  
43  
44  
45  
46  
47  
48  
49  
50  
51  
52  
53  
54  
55  
56  
57  
58  
59  
60

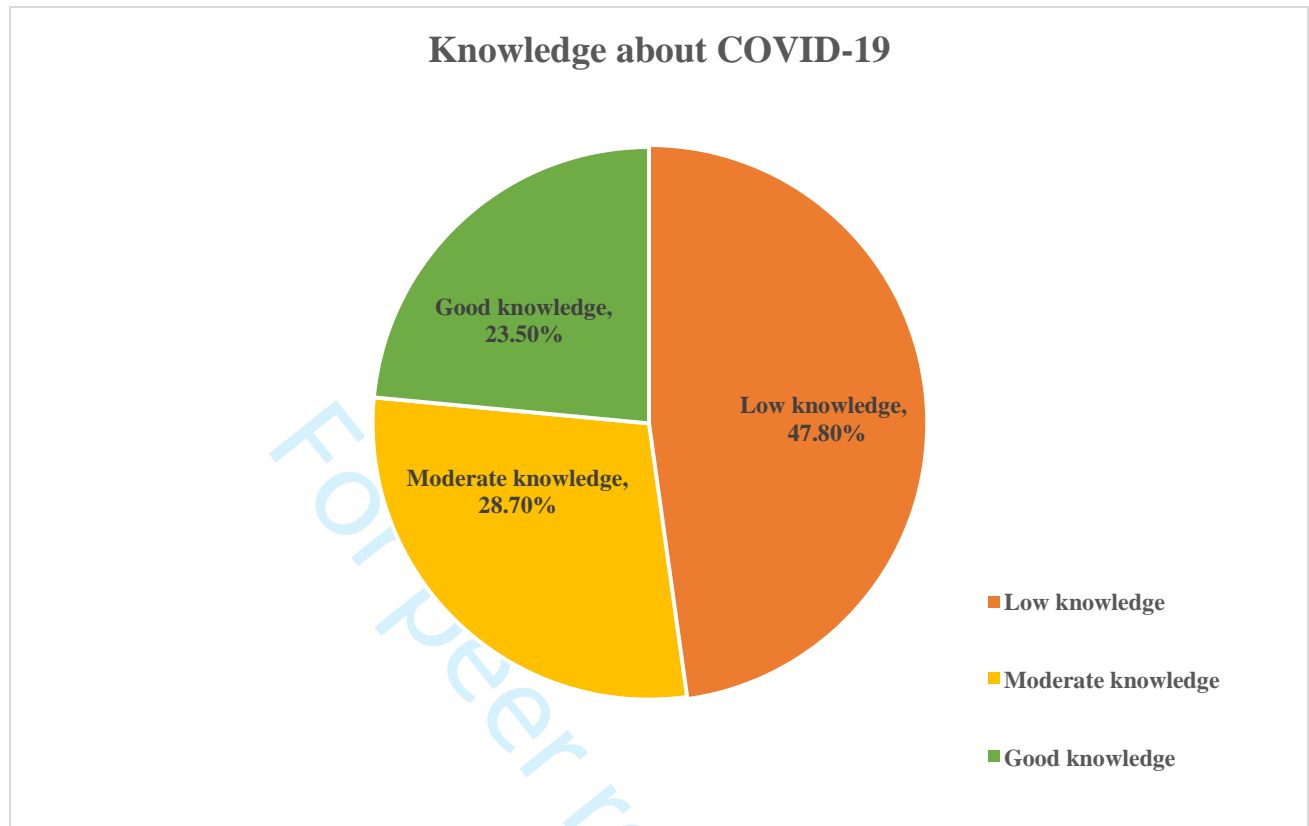

**Figure 2:** Knowledge status about COVID-19 among secondary school students in Gondar City, Northwest Ethiopia, 2021 (N= 370).

## English Version Questionnaire

**Title of the Research:** COVID-19 related knowledge and preventive behaviors among students in re-opened secondary schools in Gondar City, Northwest Ethiopia: cross-sectional study

**Name of the Organization:** University of Gondar

### Introduction

This information sheet is prepared for secondary school students of Gondar town, North West, Ethiopia. The aim of the form is to make the above concerned students clear about the purpose of research, data collection procedures and get consent to conduct the research

### Purpose of the Research Project

The aim of this study is to assess knowledge and preventive health behaviors towards COVID-19 school students in Gondar city, Northwest Ethiopia 2020

### Procedure

You are randomly selected to be one of the study participants. If you are willing to participate in this study, you will be requested to sign the consent form after you clearly understand the aim of this study. Finally, you are kindly requested to give your genuine response in the questionnaire.

### Risk and /or Discomfort

By participating in this research project, there is no risk or discomfort otherwise you will take time about 30 minutes to fill the questionnaire.

### Benefits of being in the study

There may not be direct benefits to you following your participation on this study but your participation is likely to help us in preventive health behaviors and associated factors. Ultimately this will help us to provide information for planners to consume to design and implement interventions.

### Confidentiality and Privacy Protections:

You do not need to write your name to the questionnaire. All your responses and the results obtained will be kept confidentially by using coding system whereby no one will have access to your responses.

### **Incentives/Payments for Participating**

You will not be provided any incentives or payment to take part in this project.

### **Right to Refusal or Withdraw**

You have the full right to refuse from participating in this research if you feel discomfort with it.

You have also the full right to withdraw from this study at any time if you wish.

### **Contacts and Questions:**

If you have any questions about the study please ask now. If you have questions later, want additional information, or wish to withdraw call the researcher conducting the study.

## **Annex 2: English Version Consent form**

I have been informed that the purpose of this study is to assess preventive health behaviors and its predictors of oral hygiene behavior among secondary school students. I have understood that participation in this study is entirely voluntarily. I have been told that my answers to the questions will not be given to anyone else and no reports of this study ever identify me in any way. I have also been informed that my participation or non-participation or my refusal to answer questions will have no effect on me. I understood that participation in this study does not involve risks.

Your signature below indicates that you have read or has been read to you the information provided above and have decided to participate in the study. If you later decide that you wish to withdraw from the study, simply tell me, you may discontinue your participation at any time.

Signature of the participant: \_\_\_\_\_ Date\_\_\_\_\_

Data collector's Name: \_\_\_\_\_ Signature: \_\_\_\_\_ Date\_\_\_\_\_

Supervisor's Name: \_\_\_\_\_ Signature: \_\_\_\_\_ Date\_\_\_\_\_

**Part 1: Socio demographic characteristics of a patient**

| Code | Question            | Response                                                                                          |
|------|---------------------|---------------------------------------------------------------------------------------------------|
| 1.   | Age (in years)      | _____                                                                                             |
| 2.   | Sex                 | 1. male<br>2. female                                                                              |
| 3.   | Marital status      | 1. Single<br>2. Married<br>3. Divorced<br>4. Widowed                                              |
| 4.   | Religion            | 1. Orthodox<br>2. Muslim<br>3. protestant<br>4. other                                             |
| 5.   | Place of residence  | 1. Rural<br>2. Urban                                                                              |
| 6.   | Educational status  | 1. 10th<br>2. 11th<br>3. 12th                                                                     |
| 7.   | Mothers' occupation | 1. Government employee<br>2. NGO employee<br>3. Marchant<br>4. Farmer<br>5. If other specify_____ |
| 8.   | Fathers' occupation | 1. Government employee<br>2. NGO employee<br>3. Marchant<br>4. Farmer<br>5. If other specify_____ |



|                               |                                                                                                     |                                                                                                                                                                                                         |
|-------------------------------|-----------------------------------------------------------------------------------------------------|---------------------------------------------------------------------------------------------------------------------------------------------------------------------------------------------------------|
| 9.                            | Mothers' educational status                                                                         | <ol style="list-style-type: none"> <li>1. No formal education</li> <li>2. Grade 1-8</li> <li>3. Grade 9-12</li> <li>4. Diploma &amp; above</li> </ol>                                                   |
| 10.                           | Fathers' educational status                                                                         | <ol style="list-style-type: none"> <li>1. No formal education</li> <li>2. Grade 1-8</li> <li>3. Grade 9-12</li> <li>4. Diploma &amp; above</li> </ol>                                                   |
| 11.                           | Where do you usually get information about COVID-19? (Multiple selection is possible)               | <ol style="list-style-type: none"> <li>1. Facebook</li> <li>2. Telegram</li> <li>3. Television</li> <li>4. Radio</li> <li>5. Magazine</li> <li>6. Newspaper</li> <li>7. Other (specify)-----</li> </ol> |
| <b>Part 3: Social Support</b> |                                                                                                     |                                                                                                                                                                                                         |
| 12.                           | How many people are so close to you that you can count on them if you have great personal problems? | <ol style="list-style-type: none"> <li>1. None</li> <li>2. 1-2</li> <li>3. 3-5</li> <li>4. 5+</li> </ol>                                                                                                |
| 13.                           | How much interest and concern do people show in what you do?                                        | <ol style="list-style-type: none"> <li>1. None</li> <li>2. Little</li> <li>3. Uncertain</li> <li>4. Some</li> <li>5. A lot</li> </ol>                                                                   |
| 14.                           | How easy is it to get practical help from neighbors if you should need it?                          | <ol style="list-style-type: none"> <li>1. Very difficult</li> <li>2. Difficult</li> <li>3. Possible</li> <li>4. Easy</li> <li>5. Very easy</li> </ol>                                                   |

| <b>Preventive Health Behaviors to COVID-19</b> |                                                                                                  |                                                                          |  |
|------------------------------------------------|--------------------------------------------------------------------------------------------------|--------------------------------------------------------------------------|--|
| 15.                                            | I keep a distance of at least two meters from others.                                            | 1. Not at all<br>2. Rarely<br>3. Sometimes<br>4. Many times<br>5. Always |  |
| 16.                                            | I place a tissue paper or bending elbow in front of my mouth and nose when coughing or sneezing. | 1. Not at all<br>2. Rarely<br>3. Sometimes<br>4. Many times<br>5. Always |  |
| 17.                                            | I don't shake hands with others and don't kiss them.                                             | 1. Not at all<br>2. Rarely<br>3. Sometimes<br>4. Many times<br>5. Always |  |
| 18.                                            | I don't leave the house unless absolutely necessary                                              | 1. Not at all<br>2. Rarely<br>3. Sometimes<br>4. Many times<br>5. Always |  |
| 19.                                            | I wash my hands regularly with soap and water for at least 20 seconds every hour.                | 1. Not at all<br>2. Rarely<br>3. Sometimes<br>4. Many times<br>5. Always |  |
| 20.                                            | I do not touch my eyes, nose and mouth by hands.                                                 | 1. Not at all<br>2. Rarely<br>3. Sometimes                               |  |

|                                 |                                                                                                                                                                            |                                                                          |  |
|---------------------------------|----------------------------------------------------------------------------------------------------------------------------------------------------------------------------|--------------------------------------------------------------------------|--|
|                                 |                                                                                                                                                                            | 4. Many times<br>5. Always                                               |  |
| 21.                             | I wash my hands with soap and water without touching anything after entering home.                                                                                         | 1. Not at all<br>2. Rarely<br>3. Sometimes<br>4. Many times<br>5. Always |  |
| 22.                             | I wear facemask consistently whenever I go out to my home.                                                                                                                 | 1. Not at all<br>2. Rarely<br>3. Sometimes<br>4. Many times<br>5. Always |  |
| <b>Knowledge about COVID-19</b> |                                                                                                                                                                            |                                                                          |  |
| 23.                             | Main clinical symptoms of COVID-19 are fever, cough, shortness of breath, and fatigue                                                                                      | 1. True<br>2. False<br>3. I don't know                                   |  |
| 24.                             | Unlike the common cold, stuffy nose, runny nose, and sneezing are less common in persons infected with the COVID-19 virus                                                  | 1. True<br>2. False<br>3. I don't know                                   |  |
| 25.                             | COVID-19 symptoms appear within 2–14 days                                                                                                                                  | 1. True<br>2. False<br>3. I don't know                                   |  |
| 26.                             | Currently, there is no effective treatment or vaccine for COVID-2019, but early symptomatic and supportive treatment can help most patients to recover from the infection. | 1. True<br>2. False<br>3. I don't know                                   |  |
| 27.                             | Not all persons with COVID-19 will develop severe cases. Those who are elderly, have chronic                                                                               | 1. True<br>2. False<br>3. I don't know                                   |  |

|     |                                                                                                                                                                        |                                                                                                      |
|-----|------------------------------------------------------------------------------------------------------------------------------------------------------------------------|------------------------------------------------------------------------------------------------------|
|     | illnesses, and with suppressed immunity are more likely to be severe cases                                                                                             |                                                                                                      |
| 28. | Touching or shaking hands of an infected person would result in the infection by the COVID-19 virus.                                                                   | <ol style="list-style-type: none"> <li>1. True</li> <li>2. False</li> <li>3. I don't know</li> </ol> |
| 29. | Touching an object or surface with the virus on it, then touching your mouth, nose, or eyes with the unwashed hand would result in the infection by the COVID-19 virus | <ol style="list-style-type: none"> <li>1. True</li> <li>2. False</li> <li>3. I don't know</li> </ol> |
| 30. | The COVID-19 virus spreads via respiratory droplets of infected individuals through the air during sneezing or coughing of infected patients.                          | <ol style="list-style-type: none"> <li>1. True</li> <li>2. False</li> <li>3. I don't know</li> </ol> |
| 31. | Persons with COVID-19 cannot infect the virus to others if he has no any symptom of COVID-19                                                                           | <ol style="list-style-type: none"> <li>1. True</li> <li>2. False</li> <li>3. I don't know</li> </ol> |
| 32. | Wearing masks when moving out of home is important to prevent the infection with COVID-19 virus                                                                        | <ol style="list-style-type: none"> <li>1. True</li> <li>2. False</li> <li>3. I don't know</li> </ol> |
| 33. | Children and young adults do not need to take measures to prevent the infection by the COVID-19 virus                                                                  | <ol style="list-style-type: none"> <li>1. True</li> <li>2. False</li> <li>3. I don't know</li> </ol> |
| 34. | To prevent the COVID-19 infection, individuals should avoid going to crowded places such as public transportations, religious places, Hospitals and Workplaces         | <ol style="list-style-type: none"> <li>1. True</li> <li>2. False</li> <li>3. I don't know</li> </ol> |
| 35. | Washing hands frequently with soap and water for at least 20 seconds or use an alcohol-based hand                                                                      | <ol style="list-style-type: none"> <li>1. True</li> <li>2. False</li> <li>3. I don't know</li> </ol> |

|     |                                                                                                                                                      |                                                                                                  |
|-----|------------------------------------------------------------------------------------------------------------------------------------------------------|--------------------------------------------------------------------------------------------------|
|     | sanitizer (60%) is important to prevent infection with COVID-19                                                                                      |                                                                                                  |
| 36. | Traveling to an infectious area or having contact with someone traveled to an area where the infection present is a risk for developing an infection | <ol style="list-style-type: none"><li>1. True</li><li>2. False</li><li>3. I don't know</li></ol> |
| 37. | Isolation and treatment of people who are infected with the COVID-19 virus are effective ways to reduce the spread of the virus                      | <ol style="list-style-type: none"><li>1. True</li><li>2. False</li><li>3. I don't know</li></ol> |
| 38. | People who have contact with someone infected with the COVID-19 virus should be immediately isolated in a proper place.                              | <ol style="list-style-type: none"><li>1. True</li><li>2. False</li><li>3. I don't know</li></ol> |

## STROBE Statement—checklist of items that should be included in reports of observational studies

|                           | Item No. | Recommendation                                                                                                                                                                                    | Page No. |
|---------------------------|----------|---------------------------------------------------------------------------------------------------------------------------------------------------------------------------------------------------|----------|
| <b>Title and abstract</b> | 1        | (a) Indicate the study's design with a commonly used term in the title or the abstract                                                                                                            | 2        |
|                           |          | (b) Provide in the abstract an informative and balanced summary of what was done and what was found                                                                                               | 2        |
| <b>Introduction</b>       |          |                                                                                                                                                                                                   |          |
| Background/rationale      | 2        | Explain the scientific background and rationale for the investigation being reported                                                                                                              | 4, 5     |
| Objectives                | 3        | State specific objectives, including any pre-specified hypotheses                                                                                                                                 | 5        |
| <b>Methods</b>            |          |                                                                                                                                                                                                   |          |
| Study design              | 4        | Present key elements of study design early in the paper                                                                                                                                           | 6        |
| Setting                   | 5        | Describe the setting, locations, and relevant dates, including periods of recruitment, exposure, follow-up, and data collection                                                                   | 6        |
| Participants              | 6        | (a) Give the eligibility criteria, and the sources and methods of selection of participants                                                                                                       | 6        |
| Variables                 | 7        | Clearly define all outcomes, exposures, predictors, potential confounders, and effect modifiers. Give diagnostic criteria, if applicable                                                          | 6        |
| Data sources/measurement  | 8*       | For each variable of interest, give sources of data and details of methods of assessment (measurement). Describe comparability of assessment methods if there is more than one group              | 6, 7     |
| Bias                      | 9        | Describe any efforts to address potential sources of bias                                                                                                                                         | 7        |
| Study size                | 10       | Explain how the study size was arrived at                                                                                                                                                         | 6        |
| Quantitative variables    | 11       | Explain how quantitative variables were handled in the analyses. If applicable, describe which groupings were chosen and why                                                                      | 7        |
| Statistical methods       | 12       | (a) Describe all statistical methods, including those used to control for confounding                                                                                                             | 7        |
|                           |          | (b) Describe any methods used to examine subgroups and interactions                                                                                                                               | N/A      |
|                           |          | (c) Explain how missing data were addressed                                                                                                                                                       | N/A      |
|                           |          | (d) If applicable, describe analytical methods taking account of sampling strategy                                                                                                                | N/A      |
|                           |          | (e) Describe any sensitivity analyses                                                                                                                                                             | N/A      |
| <b>Results</b>            |          |                                                                                                                                                                                                   |          |
| Participants              | 13*      | (a) Report numbers of individuals at each stage of study—eg numbers potentially eligible, examined for eligibility, confirmed eligible, included in the study, completing follow-up, and analysed | 8        |
|                           |          | (b) Give reasons for non-participation at each stage                                                                                                                                              | 8        |
|                           |          | (c) Consider use of a flow diagram                                                                                                                                                                | N/A      |
| Descriptive data          | 14*      | (a) Give characteristics of study participants (eg demographic, clinical, social) and information on exposures and potential confounders                                                          | 8        |
|                           |          | (b) Indicate number of participants with missing data for each variable of interest                                                                                                               | N/A      |
| Outcome data              | 15*      | Report numbers of outcome events or summary measures                                                                                                                                              | 8        |

|    |                          |    |                                                                                                                                                                                                              |        |
|----|--------------------------|----|--------------------------------------------------------------------------------------------------------------------------------------------------------------------------------------------------------------|--------|
| 1  |                          |    |                                                                                                                                                                                                              |        |
| 2  |                          |    |                                                                                                                                                                                                              |        |
| 3  |                          |    |                                                                                                                                                                                                              |        |
| 4  |                          |    |                                                                                                                                                                                                              |        |
| 5  |                          |    |                                                                                                                                                                                                              |        |
| 6  |                          |    |                                                                                                                                                                                                              |        |
| 7  |                          |    |                                                                                                                                                                                                              |        |
| 8  |                          |    |                                                                                                                                                                                                              |        |
| 9  |                          |    |                                                                                                                                                                                                              |        |
| 10 |                          |    |                                                                                                                                                                                                              |        |
| 11 |                          |    |                                                                                                                                                                                                              |        |
| 12 |                          |    |                                                                                                                                                                                                              |        |
| 13 |                          |    |                                                                                                                                                                                                              |        |
| 14 |                          |    |                                                                                                                                                                                                              |        |
| 15 |                          |    |                                                                                                                                                                                                              |        |
| 16 |                          |    |                                                                                                                                                                                                              |        |
| 17 |                          |    |                                                                                                                                                                                                              |        |
| 18 |                          |    |                                                                                                                                                                                                              |        |
| 19 |                          |    |                                                                                                                                                                                                              |        |
| 20 |                          |    |                                                                                                                                                                                                              |        |
| 21 |                          |    |                                                                                                                                                                                                              |        |
| 22 |                          |    |                                                                                                                                                                                                              |        |
| 23 |                          |    |                                                                                                                                                                                                              |        |
| 24 |                          |    |                                                                                                                                                                                                              |        |
| 25 |                          |    |                                                                                                                                                                                                              |        |
| 26 |                          |    |                                                                                                                                                                                                              |        |
| 27 |                          |    |                                                                                                                                                                                                              |        |
| 28 |                          |    |                                                                                                                                                                                                              |        |
| 29 |                          |    |                                                                                                                                                                                                              |        |
| 30 |                          |    |                                                                                                                                                                                                              |        |
| 31 |                          |    |                                                                                                                                                                                                              |        |
| 32 |                          |    |                                                                                                                                                                                                              |        |
| 33 |                          |    |                                                                                                                                                                                                              |        |
| 34 |                          |    |                                                                                                                                                                                                              |        |
| 35 |                          |    |                                                                                                                                                                                                              |        |
| 36 |                          |    |                                                                                                                                                                                                              |        |
| 37 |                          |    |                                                                                                                                                                                                              |        |
| 38 |                          |    |                                                                                                                                                                                                              |        |
| 39 |                          |    |                                                                                                                                                                                                              |        |
| 40 |                          |    |                                                                                                                                                                                                              |        |
| 41 |                          |    |                                                                                                                                                                                                              |        |
| 42 |                          |    |                                                                                                                                                                                                              |        |
| 43 |                          |    |                                                                                                                                                                                                              |        |
| 44 |                          |    |                                                                                                                                                                                                              |        |
| 45 |                          |    |                                                                                                                                                                                                              |        |
| 46 |                          |    |                                                                                                                                                                                                              |        |
| 47 |                          |    |                                                                                                                                                                                                              |        |
| 48 |                          |    |                                                                                                                                                                                                              |        |
| 49 |                          |    |                                                                                                                                                                                                              |        |
| 50 |                          |    |                                                                                                                                                                                                              |        |
| 51 |                          |    |                                                                                                                                                                                                              |        |
| 52 |                          |    |                                                                                                                                                                                                              |        |
| 53 |                          |    |                                                                                                                                                                                                              |        |
| 54 |                          |    |                                                                                                                                                                                                              |        |
| 55 |                          |    |                                                                                                                                                                                                              |        |
| 56 |                          |    |                                                                                                                                                                                                              |        |
| 57 |                          |    |                                                                                                                                                                                                              |        |
| 58 |                          |    |                                                                                                                                                                                                              |        |
| 59 |                          |    |                                                                                                                                                                                                              |        |
| 60 |                          |    |                                                                                                                                                                                                              |        |
|    | Main results             | 16 | (a) Give unadjusted estimates and, if applicable, confounder-adjusted estimates and their precision (eg, 95% confidence interval). Make clear which confounders were adjusted for and why they were included | 9      |
|    |                          |    | (b) Report category boundaries when continuous variables were categorized                                                                                                                                    | 8      |
|    |                          |    | (c) If relevant, consider translating estimates of relative risk into absolute risk for a meaningful time period                                                                                             | N/A    |
|    | Other analyses           | 17 | Report other analyses done—eg analyses of subgroups and interactions, and sensitivity analyses                                                                                                               | 8, 9   |
|    | <b>Discussion</b>        |    |                                                                                                                                                                                                              |        |
|    | Key results              | 18 | Summarise key results with reference to study objectives                                                                                                                                                     | 10     |
|    | Limitations              | 19 | Discuss limitations of the study, taking into account sources of potential bias or imprecision. Discuss both direction and magnitude of any potential bias                                                   | 12     |
|    | Interpretation           | 20 | Give a cautious overall interpretation of results considering objectives, limitations, multiplicity of analyses, results from similar studies, and other relevant evidence                                   | 10, 11 |
|    | Generalisability         | 21 | Discuss the generalisability (external validity) of the study results                                                                                                                                        | 10, 11 |
|    | <b>Other information</b> |    |                                                                                                                                                                                                              |        |
|    | Funding                  | 22 | Give the source of funding and the role of the funders for the present study and, if applicable, for the original study on which the present article is based                                                | 13     |
