# Supplementary material for: Determinants of COVID-19-related knowledge and preventive behaviours among students in reopened secondary schools: cross-sectional study
Source: PubMed Central journal article supplement — BMJ Open. 2021 Apr 24;11(4):e050189. doi: 10.1136/bmjopen-2021-050189 (PMC8076628; doi:10.1136/bmjopen-2021-050189), 2021-04-24
Supplement: bmjopen-2021-050189supp001.pdf [file bmjopen-2021-050189supp001.pdf]

## **English Version Questionnaire**

**Title of the Research:** COVID-19 related knowledge and preventive behaviors among students in re-opened secondary schools in Gondar City, Northwest Ethiopia: cross-sectional study

**Name of the Organization:** University of Gondar

### **Introduction**

This information sheet is prepared for secondary school students of Gondar town, North West, Ethiopia. The aim of the form is to make the above concerned students clear about the purpose of research, data collection procedures and get consent to conduct the research

### **Purpose of the Research Project**

The aim of this study is to assess knowledge and preventive health behaviors towards COVID-19 school students in Gondar city, Northwest Ethiopia 2020

### **Procedure**

You are randomly selected to be one of the study participants. If you are willing to participate in this study, you will be requested to sign the consent form after you clearly understand the aim of this study. Finally, you are kindly requested to give your genuine response in the questionnaire.

### **Risk and /or Discomfort**

By participating in this research project, there is no risk or discomfort otherwise you will take time about 30 minutes to fill the questionnaire.

### **Benefits of being in the study**

There may not be direct benefits to you following your participation on this study but your participation is likely to help us in preventive health behaviors and associated factors. Ultimately this will help us to provide information for planners to consume to design and implement interventions.

### **Confidentiality and Privacy Protections:**

You do not need to write your name to the questionnaire. All your responses and the results obtained will be kept confidentially by using coding system whereby no one will have access to your responses.

**Incentives/Payments for Participating**

You will not be provided any incentives or payment to take part in this project.

**Right to Refusal or Withdraw**

You have the full right to refuse from participating in this research if you feel discomfort with it.

You have also the full right to withdraw from this study at any time if you wish.

**Contacts and Questions:**

If you have any questions about the study please ask now. If you have questions later, want additional information, or wish to withdraw call the researcher conducting the study.

**Annex 2: English Version Consent form**

I have been informed that the purpose of this study is to assess preventive health behaviors and its predictors of oral hygiene behavior among secondary school students. I have understood that participation in this study is entirely voluntarily. I have been told that my answers to the questions will not be given to anyone else and no reports of this study ever identify me in any way. I have also been informed that my participation or non-participation or my refusal to answer questions will have no effect on me. I understood that participation in this study does not involve risks.

Your signature below indicates that you have read or has been read to you the information provided above and have decided to participate in the study. If you later decide that you wish to withdraw from the study, simply tell me, you may discontinue your participation at any time.

Signature of the participant: \_\_\_\_\_ Date \_\_\_\_\_

Data collector's Name: \_\_\_\_\_ Signature: \_\_\_\_\_ Date \_\_\_\_\_

Supervisor's Name: \_\_\_\_\_ Signature: \_\_\_\_\_ Date \_\_\_\_\_

**Part 1: Socio demographic characteristics of a patient**

| Code | Question            | Response                                                                                          |
|------|---------------------|---------------------------------------------------------------------------------------------------|
| 1.   | Age (in years)      | _____                                                                                             |
| 2.   | Sex                 | 1. male<br>2. female                                                                              |
| 3.   | Marital status      | 1. Single<br>2. Married<br>3. Divorced<br>4. Widowed                                              |
| 4.   | Religion            | 1. Orthodox<br>2. Muslim<br>3. protestant<br>4. other                                             |
| 5.   | Place of residence  | 1. Rural<br>2. Urban                                                                              |
| 6.   | Educational status  | 1. 10th<br>2. 11th<br>3. 12th                                                                     |
| 7.   | Mothers' occupation | 1. Government employee<br>2. NGO employee<br>3. Marchant<br>4. Farmer<br>5. If other specify_____ |
| 8.   | Fathers' occupation | 1. Government employee<br>2. NGO employee<br>3. Marchant<br>4. Farmer<br>5. If other specify_____ |

|                               |                                                                                                     |                                                                                                                                                                                                         |
|-------------------------------|-----------------------------------------------------------------------------------------------------|---------------------------------------------------------------------------------------------------------------------------------------------------------------------------------------------------------|
| 9.                            | Mothers' educational status                                                                         | <ol style="list-style-type: none"> <li>1. No formal education</li> <li>2. Grade 1-8</li> <li>3. Grade 9-12</li> <li>4. Diploma &amp; above</li> </ol>                                                   |
| 10.                           | Fathers' educational status                                                                         | <ol style="list-style-type: none"> <li>1. No formal education</li> <li>2. Grade 1-8</li> <li>3. Grade 9-12</li> <li>4. Diploma &amp; above</li> </ol>                                                   |
| 11.                           | Where do you usually get information about COVID-19? (Multiple selection is possible)               | <ol style="list-style-type: none"> <li>1. Facebook</li> <li>2. Telegram</li> <li>3. Television</li> <li>4. Radio</li> <li>5. Magazine</li> <li>6. Newspaper</li> <li>7. Other (specify)-----</li> </ol> |
| <b>Part 3: Social Support</b> |                                                                                                     |                                                                                                                                                                                                         |
| 12.                           | How many people are so close to you that you can count on them if you have great personal problems? | <ol style="list-style-type: none"> <li>1. None</li> <li>2. 1-2</li> <li>3. 3-5</li> <li>4. 5+</li> </ol>                                                                                                |
| 13.                           | How much interest and concern do people show in what you do?                                        | <ol style="list-style-type: none"> <li>1. None</li> <li>2. Little</li> <li>3. Uncertain</li> <li>4. Some</li> <li>5. A lot</li> </ol>                                                                   |
| 14.                           | How easy is it to get practical help from neighbors if you should need it?                          | <ol style="list-style-type: none"> <li>1. Very difficult</li> <li>2. Difficult</li> <li>3. Possible</li> <li>4. Easy</li> <li>5. Very easy</li> </ol>                                                   |

| <b>Preventive Health Behaviors to COVID-19</b> |                                                                                                  |                                                                          |  |
|------------------------------------------------|--------------------------------------------------------------------------------------------------|--------------------------------------------------------------------------|--|
| 15.                                            | I keep a distance of at least two meters from others.                                            | 1. Not at all<br>2. Rarely<br>3. Sometimes<br>4. Many times<br>5. Always |  |
| 16.                                            | I place a tissue paper or bending elbow in front of my mouth and nose when coughing or sneezing. | 1. Not at all<br>2. Rarely<br>3. Sometimes<br>4. Many times<br>5. Always |  |
| 17.                                            | I don't shake hands with others and don't kiss them.                                             | 1. Not at all<br>2. Rarely<br>3. Sometimes<br>4. Many times<br>5. Always |  |
| 18.                                            | I don't leave the house unless absolutely necessary                                              | 1. Not at all<br>2. Rarely<br>3. Sometimes<br>4. Many times<br>5. Always |  |
| 19.                                            | I wash my hands regularly with soap and water for at least 20 seconds every hour.                | 1. Not at all<br>2. Rarely<br>3. Sometimes<br>4. Many times<br>5. Always |  |
| 20.                                            | I do not touch my eyes, nose and mouth by hands.                                                 | 1. Not at all<br>2. Rarely<br>3. Sometimes                               |  |

|                                 |                                                                                                                                                                            |                                                                          |  |
|---------------------------------|----------------------------------------------------------------------------------------------------------------------------------------------------------------------------|--------------------------------------------------------------------------|--|
|                                 |                                                                                                                                                                            | 4. Many times<br>5. Always                                               |  |
| 21.                             | I wash my hands with soap and water without touching anything after entering home.                                                                                         | 1. Not at all<br>2. Rarely<br>3. Sometimes<br>4. Many times<br>5. Always |  |
| 22.                             | I wear facemask consistently whenever I go out to my home.                                                                                                                 | 1. Not at all<br>2. Rarely<br>3. Sometimes<br>4. Many times<br>5. Always |  |
| <b>Knowledge about COVID-19</b> |                                                                                                                                                                            |                                                                          |  |
| 23.                             | Main clinical symptoms of COVID-19 are fever, cough, shortness of breath, and fatigue                                                                                      | 1. True<br>2. False<br>3. I don't know                                   |  |
| 24.                             | Unlike the common cold, stuffy nose, runny nose, and sneezing are less common in persons infected with the COVID-19 virus                                                  | 1. True<br>2. False<br>3. I don't know                                   |  |
| 25.                             | COVID-19 symptoms appear within 2–14 days                                                                                                                                  | 1. True<br>2. False<br>3. I don't know                                   |  |
| 26.                             | Currently, there is no effective treatment or vaccine for COVID-2019, but early symptomatic and supportive treatment can help most patients to recover from the infection. | 1. True<br>2. False<br>3. I don't know                                   |  |
| 27.                             | Not all persons with COVID-19 will develop severe cases. Those who are elderly, have chronic                                                                               | 1. True<br>2. False<br>3. I don't know                                   |  |

|     |                                                                                                                                                                        |                                                                                                      |
|-----|------------------------------------------------------------------------------------------------------------------------------------------------------------------------|------------------------------------------------------------------------------------------------------|
|     | illnesses, and with suppressed immunity are more likely to be severe cases                                                                                             |                                                                                                      |
| 28. | Touching or shaking hands of an infected person would result in the infection by the COVID-19 virus.                                                                   | <ol style="list-style-type: none"> <li>1. True</li> <li>2. False</li> <li>3. I don't know</li> </ol> |
| 29. | Touching an object or surface with the virus on it, then touching your mouth, nose, or eyes with the unwashed hand would result in the infection by the COVID-19 virus | <ol style="list-style-type: none"> <li>1. True</li> <li>2. False</li> <li>3. I don't know</li> </ol> |
| 30. | The COVID-19 virus spreads via respiratory droplets of infected individuals through the air during sneezing or coughing of infected patients.                          | <ol style="list-style-type: none"> <li>1. True</li> <li>2. False</li> <li>3. I don't know</li> </ol> |
| 31. | Persons with COVID-19 cannot infect the virus to others if he has no any symptom of COVID-19                                                                           | <ol style="list-style-type: none"> <li>1. True</li> <li>2. False</li> <li>3. I don't know</li> </ol> |
| 32. | Wearing masks when moving out of home is important to prevent the infection with COVID-19 virus                                                                        | <ol style="list-style-type: none"> <li>1. True</li> <li>2. False</li> <li>3. I don't know</li> </ol> |
| 33. | Children and young adults do not need to take measures to prevent the infection by the COVID-19 virus                                                                  | <ol style="list-style-type: none"> <li>1. True</li> <li>2. False</li> <li>3. I don't know</li> </ol> |
| 34. | To prevent the COVID-19 infection, individuals should avoid going to crowded places such as public transportations, religious places, Hospitals and Workplaces         | <ol style="list-style-type: none"> <li>1. True</li> <li>2. False</li> <li>3. I don't know</li> </ol> |
| 35. | Washing hands frequently with soap and water for at least 20 seconds or use an alcohol-based hand                                                                      | <ol style="list-style-type: none"> <li>1. True</li> <li>2. False</li> <li>3. I don't know</li> </ol> |

|     |                                                                                                                                                      |                                                                                                  |
|-----|------------------------------------------------------------------------------------------------------------------------------------------------------|--------------------------------------------------------------------------------------------------|
|     | sanitizer (60%) is important to prevent infection with COVID-19                                                                                      |                                                                                                  |
| 36. | Traveling to an infectious area or having contact with someone traveled to an area where the infection present is a risk for developing an infection | <ol style="list-style-type: none"><li>1. True</li><li>2. False</li><li>3. I don't know</li></ol> |
| 37. | Isolation and treatment of people who are infected with the COVID-19 virus are effective ways to reduce the spread of the virus                      | <ol style="list-style-type: none"><li>1. True</li><li>2. False</li><li>3. I don't know</li></ol> |
| 38. | People who have contact with someone infected with the COVID-19 virus should be immediately isolated in a proper place.                              | <ol style="list-style-type: none"><li>1. True</li><li>2. False</li><li>3. I don't know</li></ol> |
